# Supplementary material for: The role of Jagged1 as a dynamic switch of cancer cell plasticity in PDAC assembloids
Source: PubMed Central journal article supplement (PMC9169352; doi:10.7150/thno.71364), 2022-05-24
Supplement: thnov12p4431s1.pdf [file thnov12p4431s1.pdf]

1 **Supplementary Materials for**

2  
3 **The role of Jagged1 as a dynamic switch**  
4 **of cancer cell plasticity in PDAC assembloids**

5  
6 Jae-II Choi<sup>1\*</sup>, John Hoon Rim<sup>1\*</sup>, Sung Ill Jang<sup>2</sup>, Joon Seong Park<sup>3</sup>,

7 Hak Park<sup>1</sup>, Jae Hee Cho<sup>2#</sup> and Jong-Baeck Lim<sup>1#</sup>

8  
9 <sup>1</sup>Department of Laboratory Medicine, Severance Hospital, Yonsei University College  
10 of Medicine, Seoul, Republic of Korea

11 <sup>2</sup>Institute of Gastroenterology, Department of Internal Medicine, Gangnam Severance  
12 Hospital, Yonsei University College of Medicine, Seoul, Republic of Korea

13 <sup>3</sup>Pancreatobiliary Cancer Clinic, Department of Surgery, Gangnam Severance  
14 Hospital, Yonsei University College of Medicine, Seoul, Republic of Korea

15  
16 \* These authors contributed equally to this work.

18 #Co-corresponding author: Jong-Baeck Lim, 50-1 Yonsei-Ro, Seodaemun-Gu,  
19 Severance Hospital, Yonsei University College of Medicine, Seoul, Republic of Korea  
20 Tel: 82-2-2228-2448; Fax: 82-2-2019-8926; E-mail: jlim@yuhs.ac, jlim@yonsei.ac.kr

21 #Co-corresponding author: Jae Hee Cho, 211 Eonju-Ro, Gangnam-Gu, Gangnam  
22 Severance Hospital, Yonsei University College of Medicine, Seoul, Republic of Korea  
23 Tel: +82-2-2019-3310, E-mail: jhcho9328@yuhs.ac

24

25 **SUPPLEMENTARY FIGURE LEGENDS**

26 **Figure S1. (A)** Sorting purity of CD44(+)PI(-) in the PDAC organoids. **(B)** Schematic  
27 figure for the experiment of 2<sup>nd</sup> differentiation capacity in the organoids. **(C)** FACS plot  
28 showing the CD24, CD44, and EpCAM on control organoids and 2<sup>nd</sup> differentiated  
29 organoids from sorted CD44(+) cells in the 1<sup>st</sup> differentiated organoid. EpCAM  
30 expression levels in the CD44(+)CD24(+) groups. Dotted lines indicate fluorescence  
31 minus one (FMO).

32 **Figure S2. (A)** Heatmap analysis of genes highly expressed in pancreatic cancer  
33 tumors compared to normal tissue in TCGA-PAAD data using the R package caret.  
34 Blue color in the row side indicates the top 100 differentially expressed genes in the  
35 normal and tumor samples. **(B)** Heatmap showing the subgroups of CD3D- and CD2-  
36 expressing clusters using the DatabaseImmuneCellExpressionData in SingleR.

37 **Figure S3. (A)** Molecular function (MP) and **(B)** biological process (BP) DAVID  
38 analysis of the significantly regulated gene list in States 1, 2, and 3 ( $P < 0.05$ , T-test).  
39 **(C)** Heatmap showing the apoptotic process in genes significantly regulated in States  
40 1, 2, and 3. **(D)** FACS plot showing the CDH1 and CDH2 in the CD24(+)CD44(+) CICs  
41 (N = 3 biological replicates). **(E-H)** Expression of markers associated with  
42 differentiated ductal, CICs **(E)**, epithelial **(F)**, mesenchymal **(G)**, and QM-PDA **(H)** in  
43 the CIC subset of PDAC assembloids (State 1 in the trajectory analysis).

44 **Figure S4. (A)** Quantification of *WNT5B* and *TGFB1* mRNA levels by rhJAG1 with  
45 DAPT in ECs (\*\* $P < 0.05$ , Bonferroni's multiple comparisons test).

46 **Figure S5. (A) (Left)** FACS plot showing CFSE(-)CD24(+)CD44(+)EpCAM(+) CICs  
47 after co-culture of PDAC organoid derived CD44(-) differentiated cancer cells, CFSE-

48 labeled HUVECs and autologous PBMC for treatment with control and DAPT. **(Right)**  
49 Quantification of the CFSE(-)CD24(+)CD44(+) CICs in the indicated groups (N = 3  
50 biological replicates, \*\*P < 0.05, Mann-Whitney *U* test). **(B)** Overall survival analysis  
51 according to *NOTCH3* and *DLL4* expression level in TCGA-PAAD data.

52

### 53 **SUPPLEMENTARY TABLE LEGENDS**

54 **Table S1.** Donor information list.

55 **Table S2.** Differentially expressed gene list according to differentiation states by  
56 trajectory analysis.

57 **Table S3.** Primer sequence information.

**Figure S1**

**A**

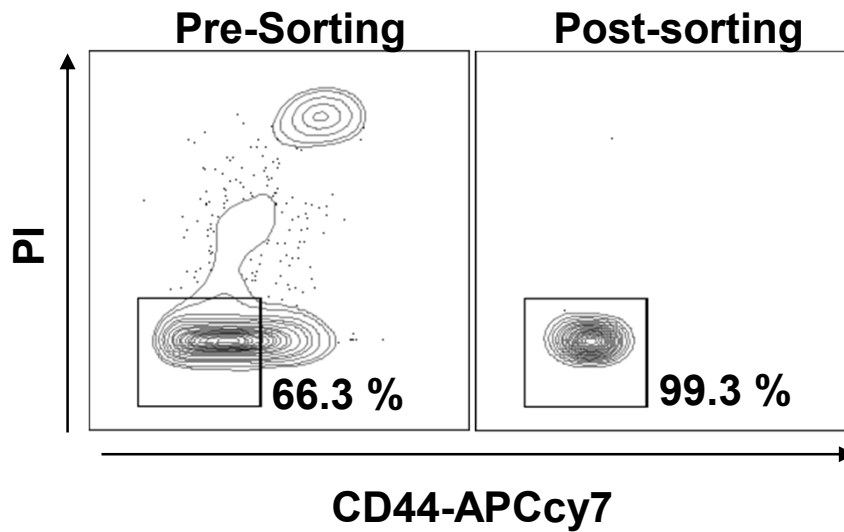

**B**

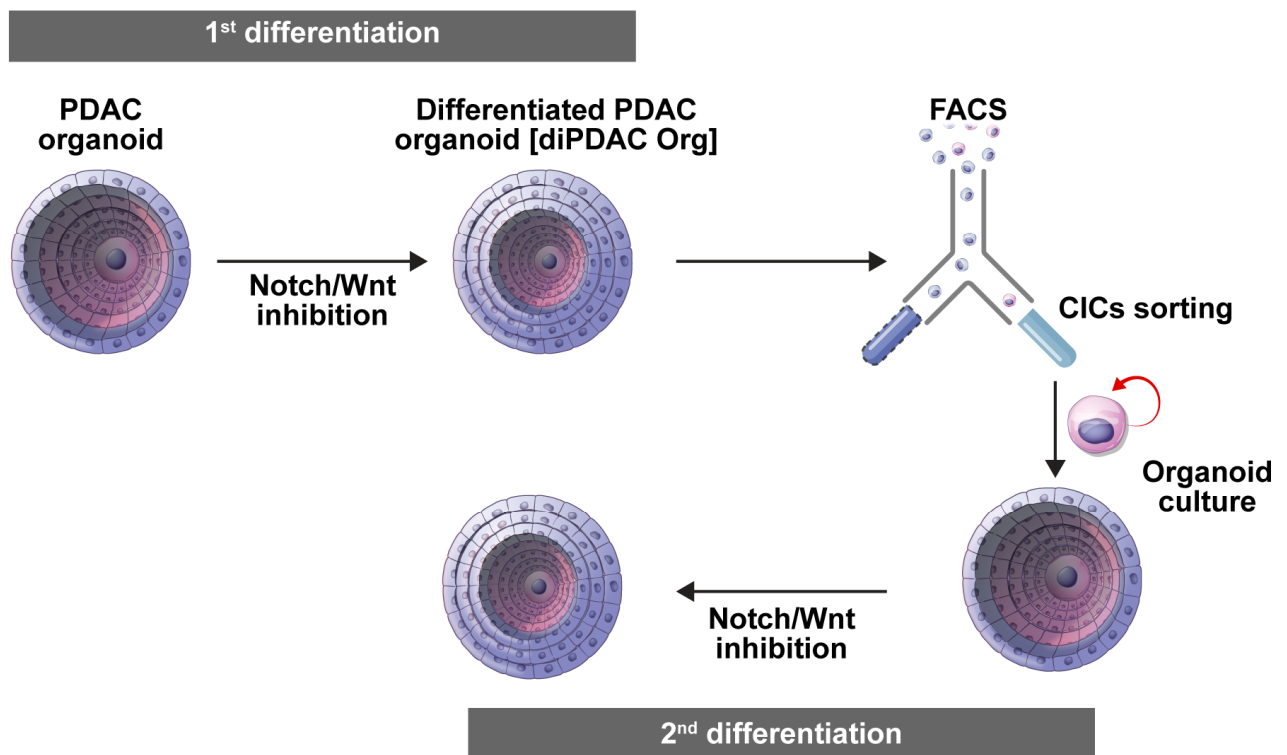

**C**

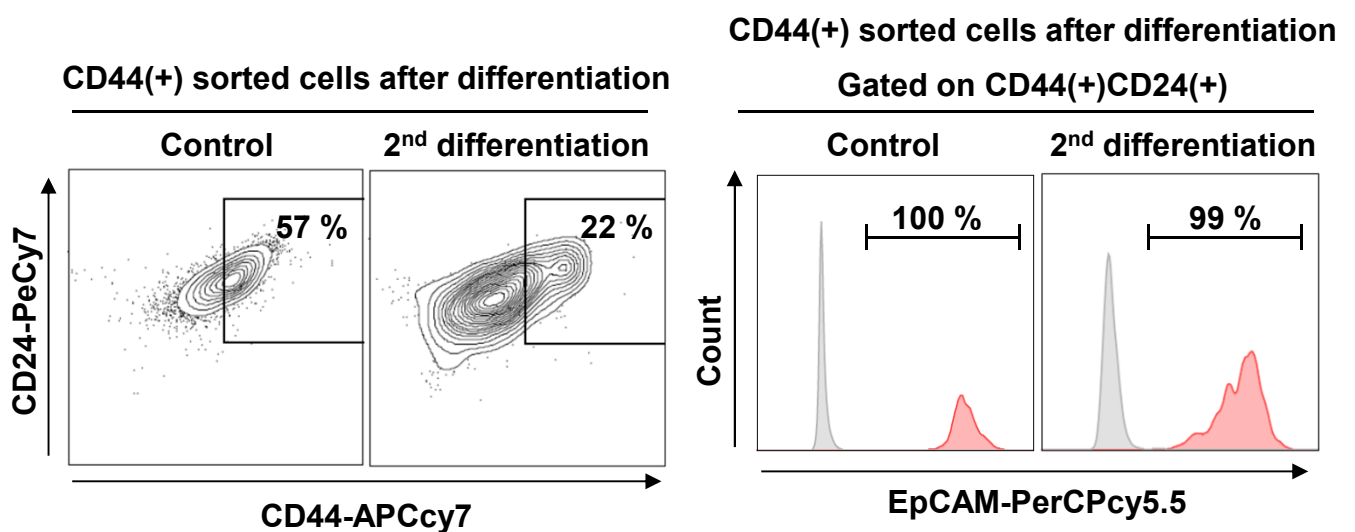

# Figure S2

## A

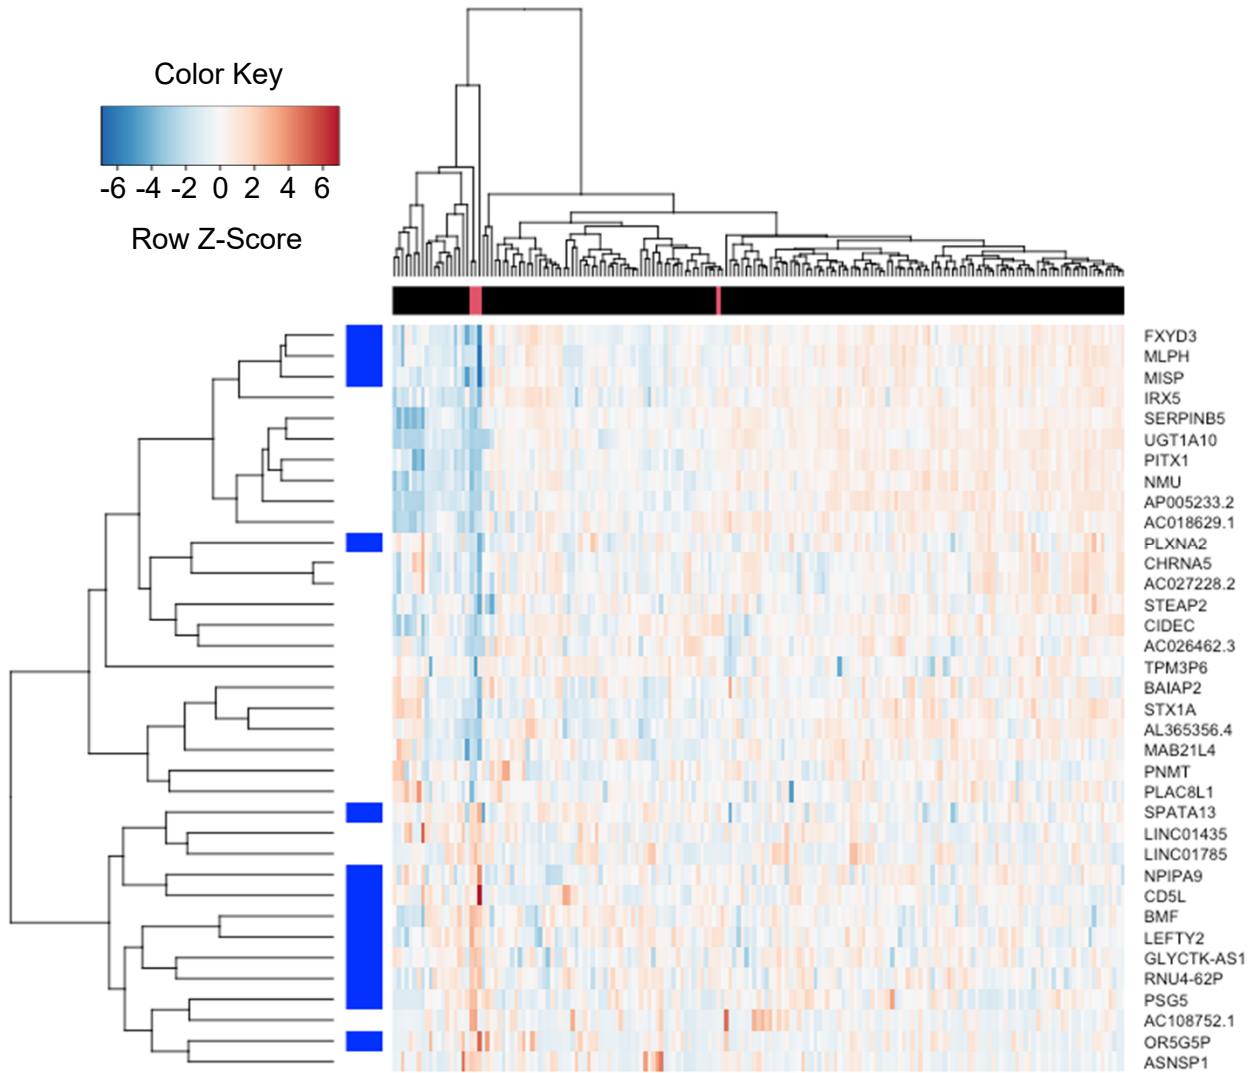

## B

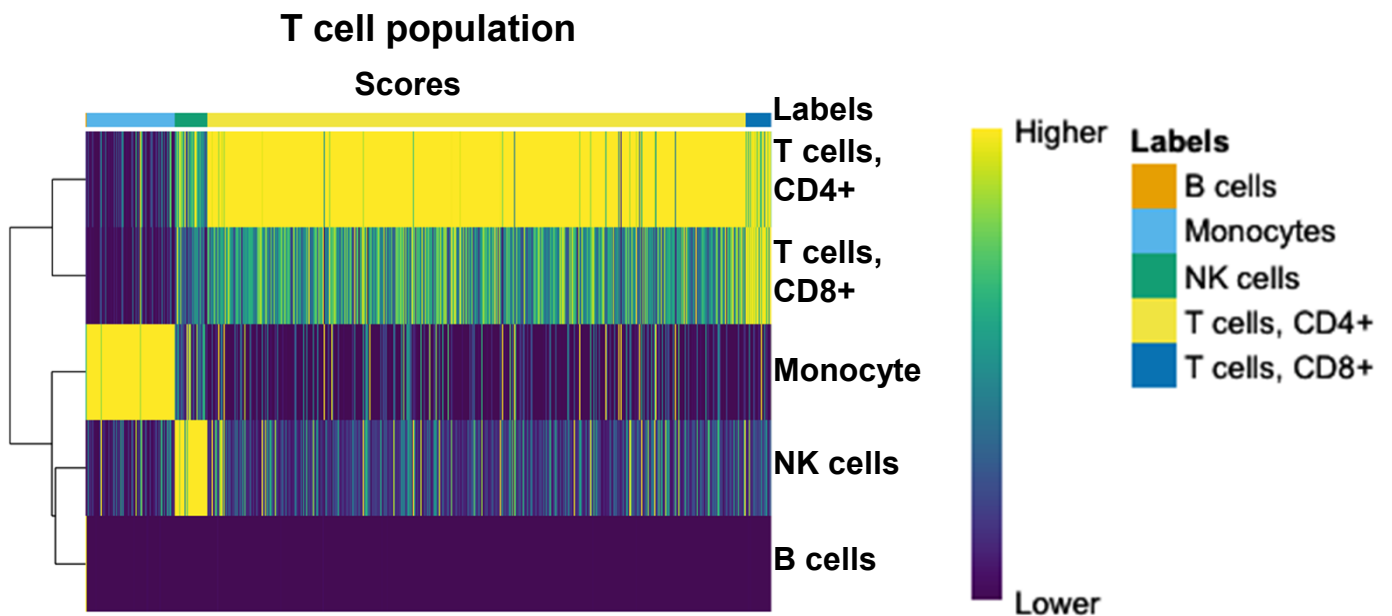

# Figure S3

## A

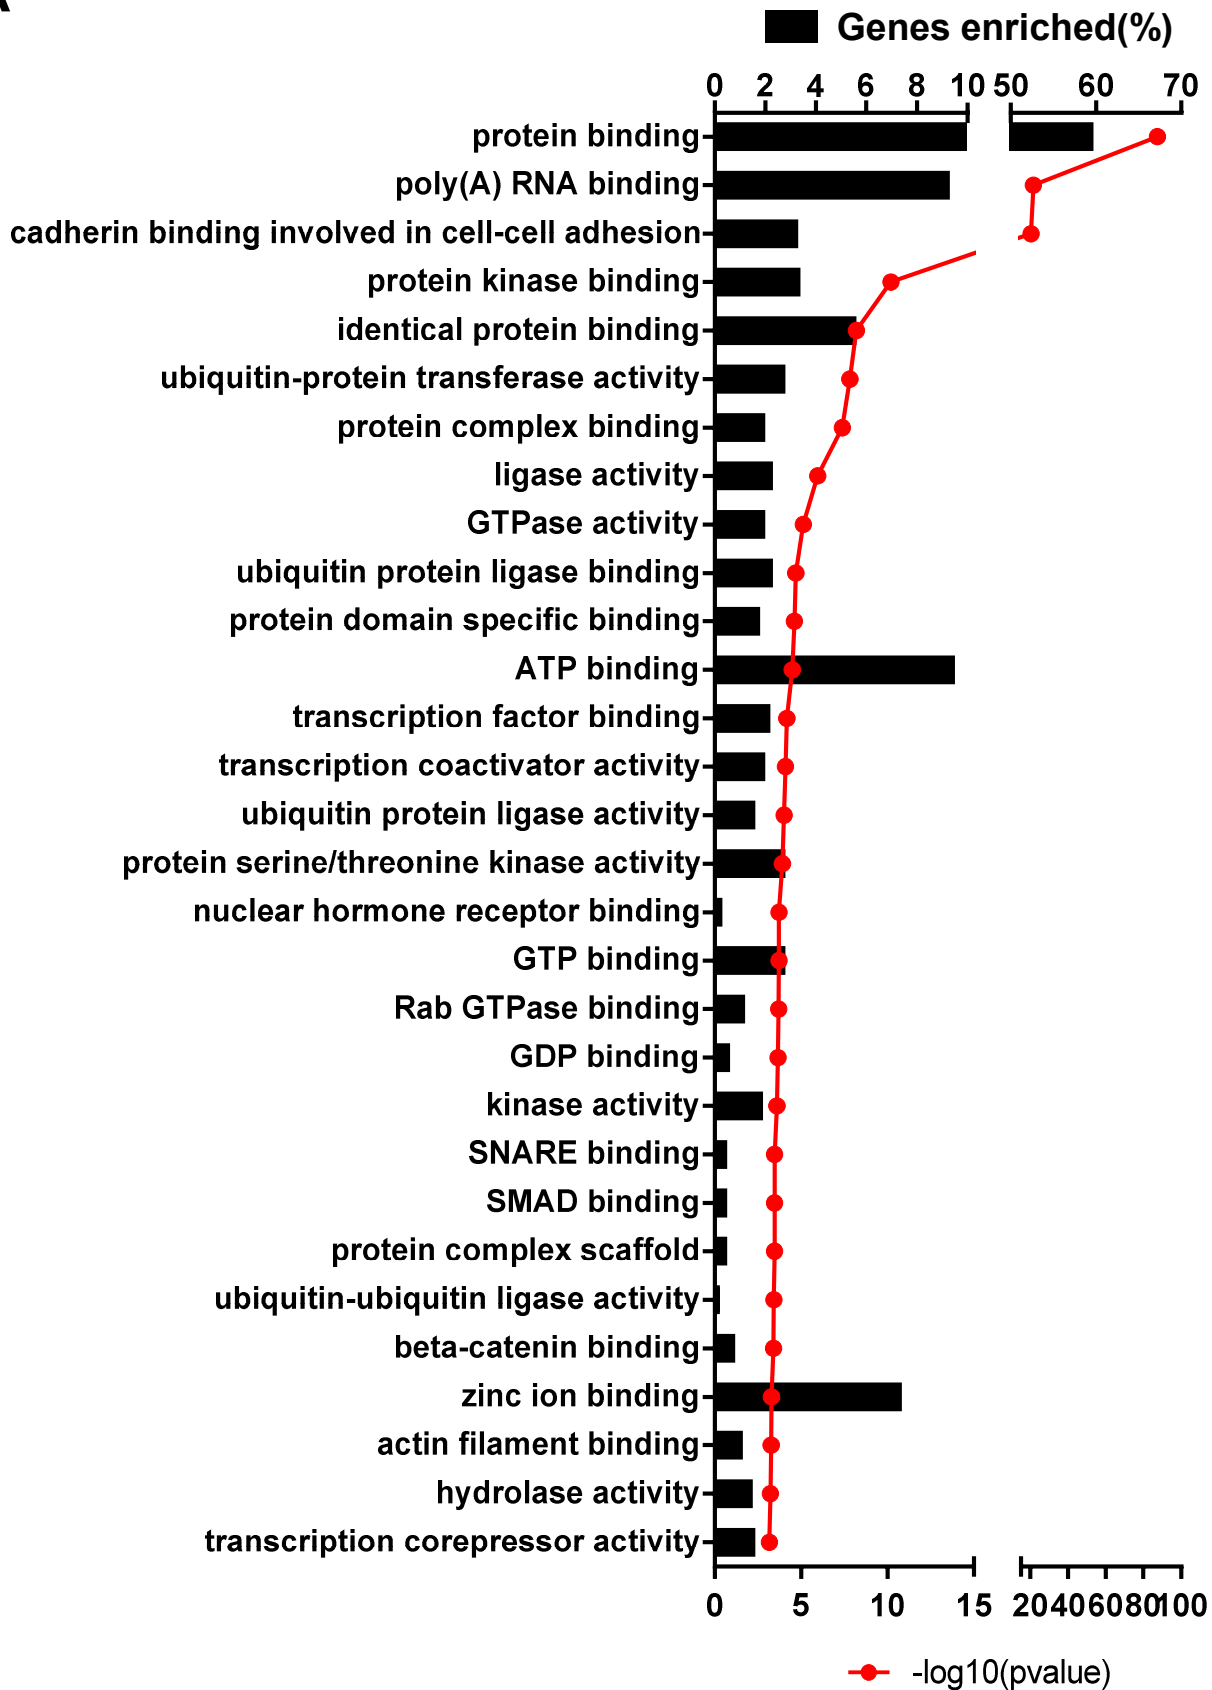

Figure S3

B

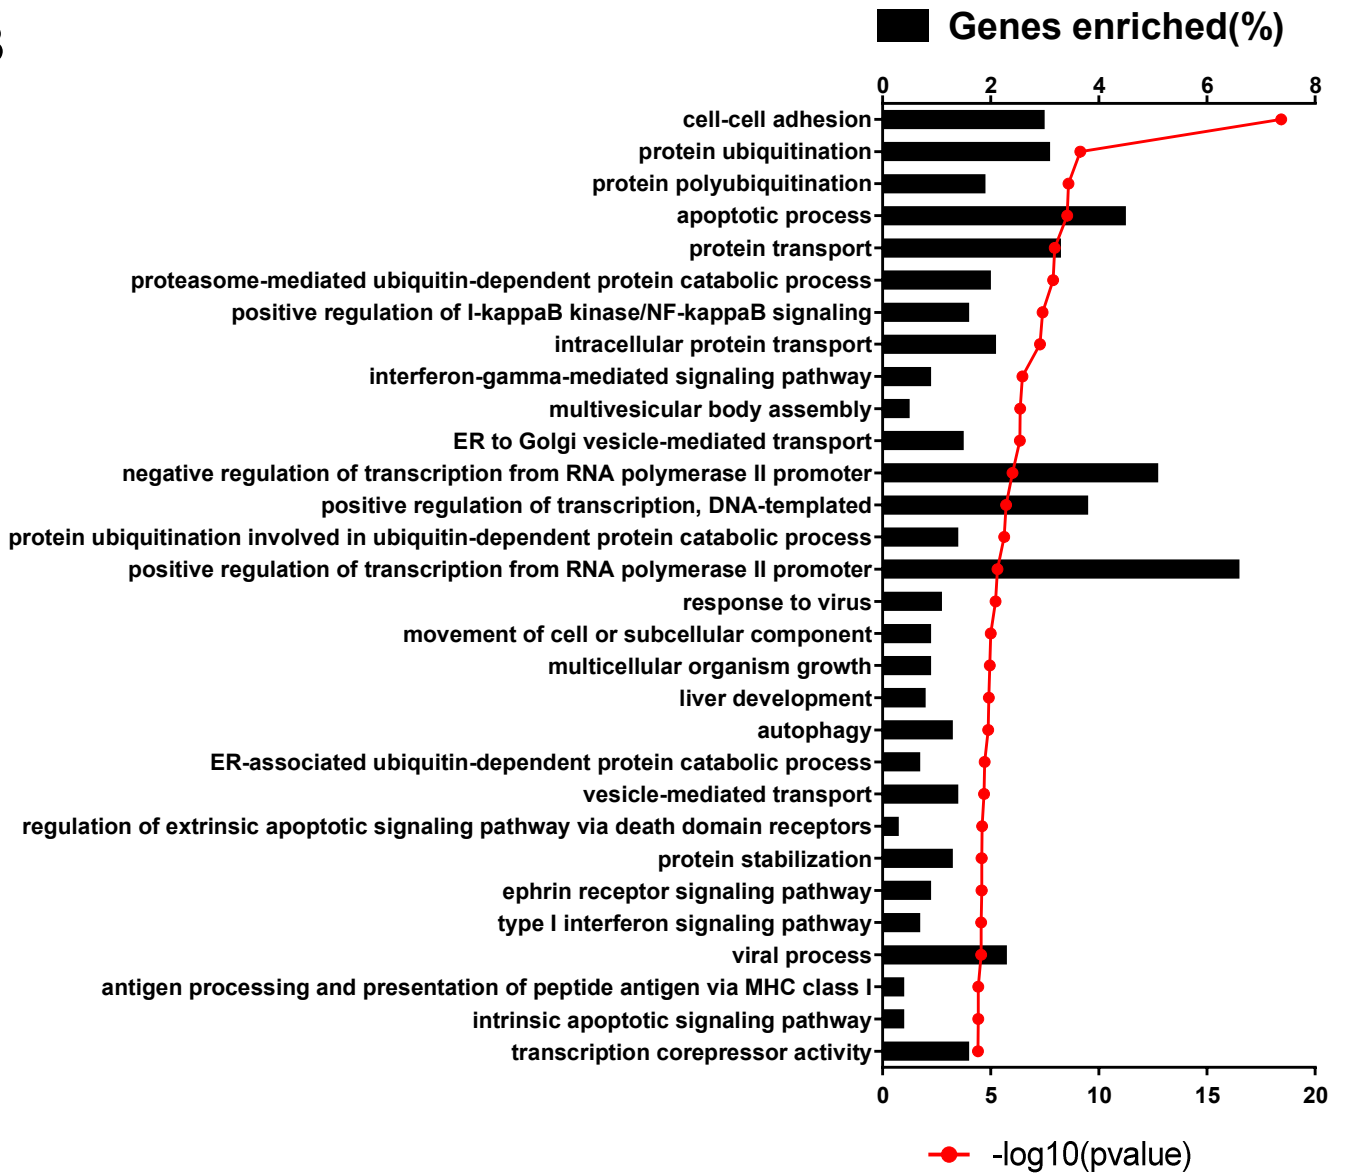

Biological process (BP)



Figure S3

C

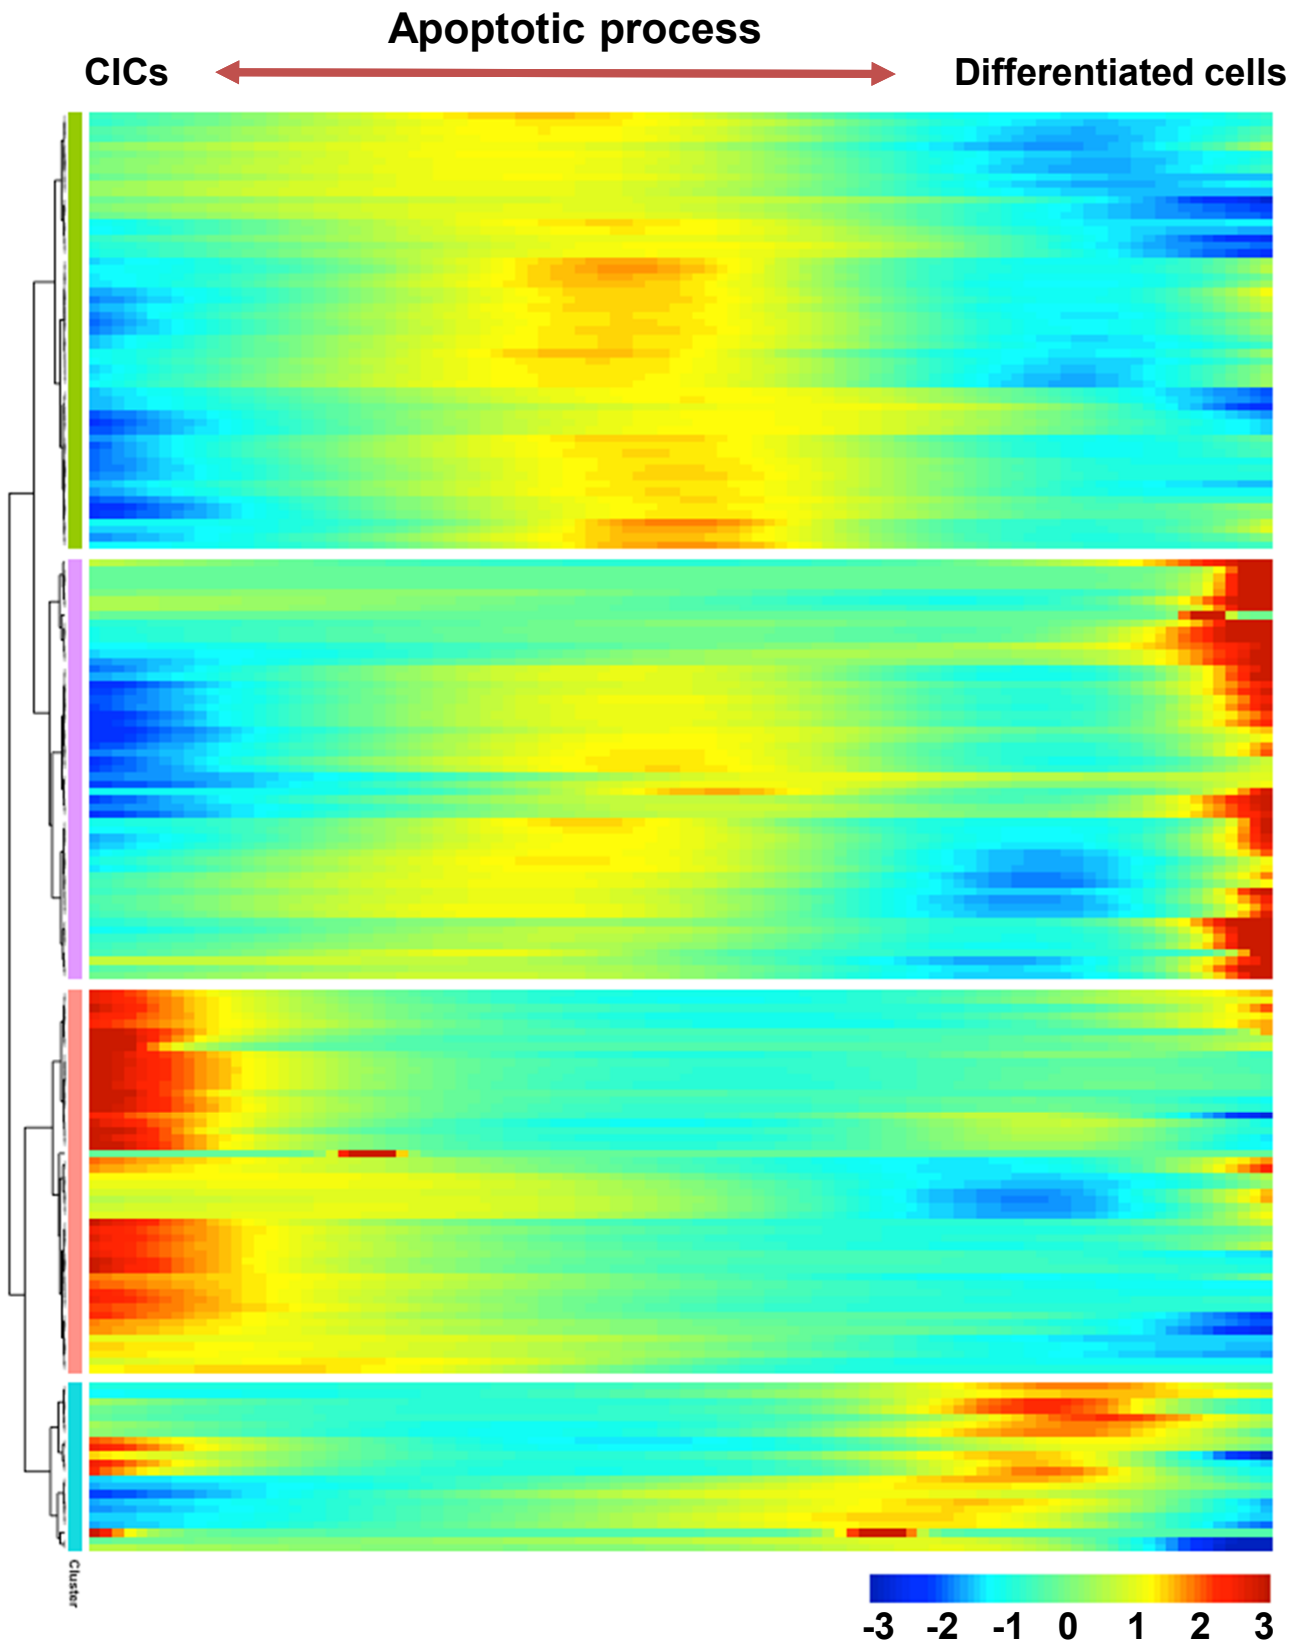

# Figure S3

## D

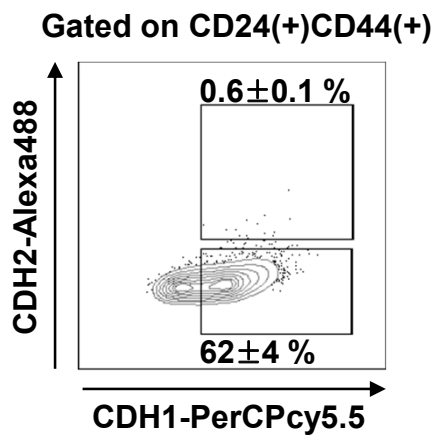

## E

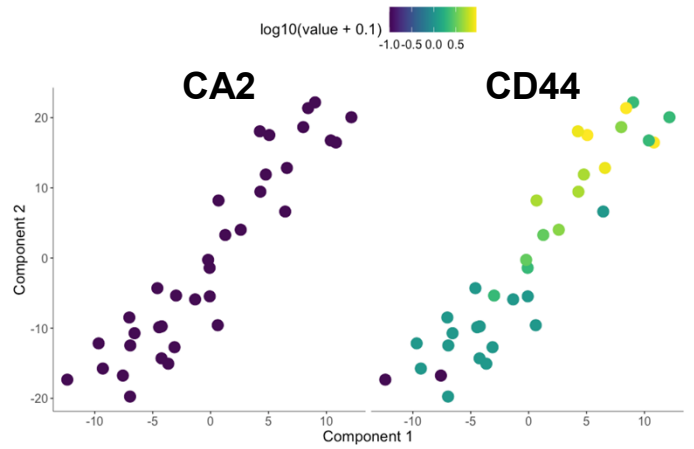

## F

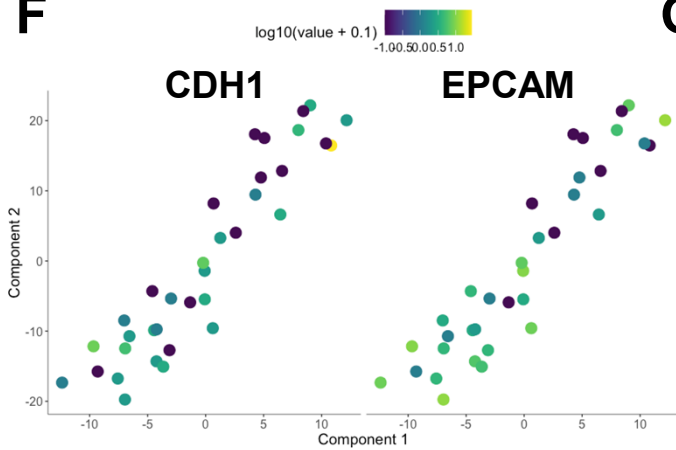

## G

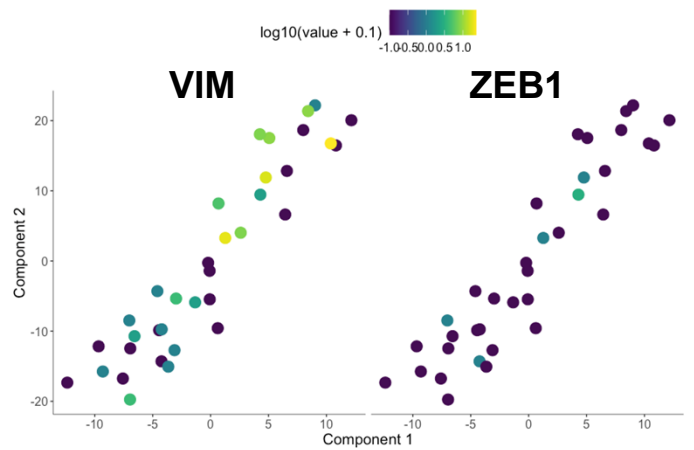

## H

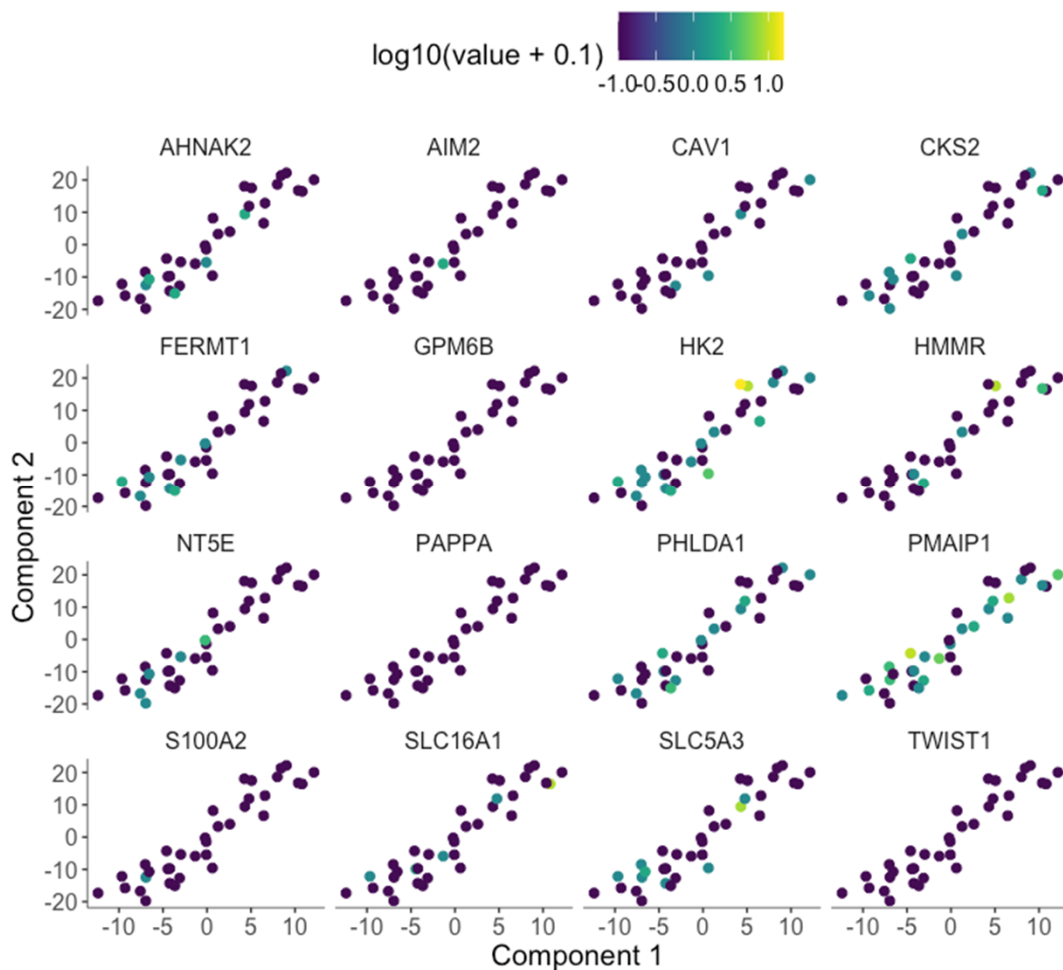

Figure S4

A

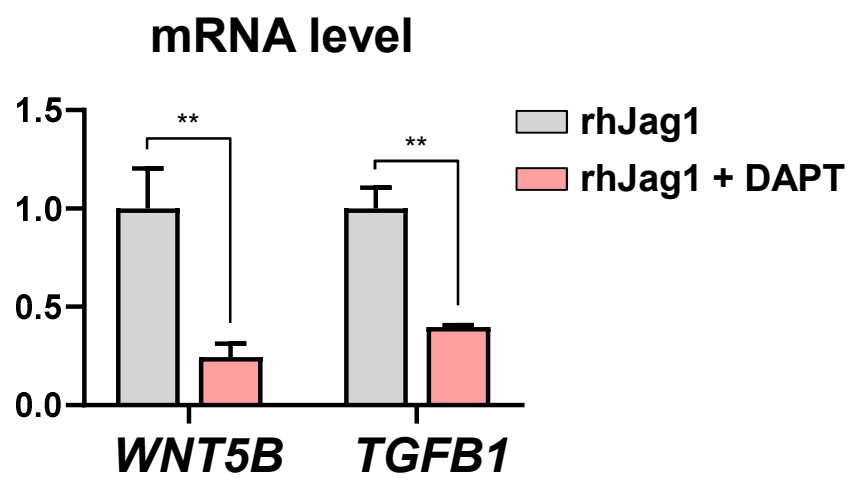

Figure S5

A

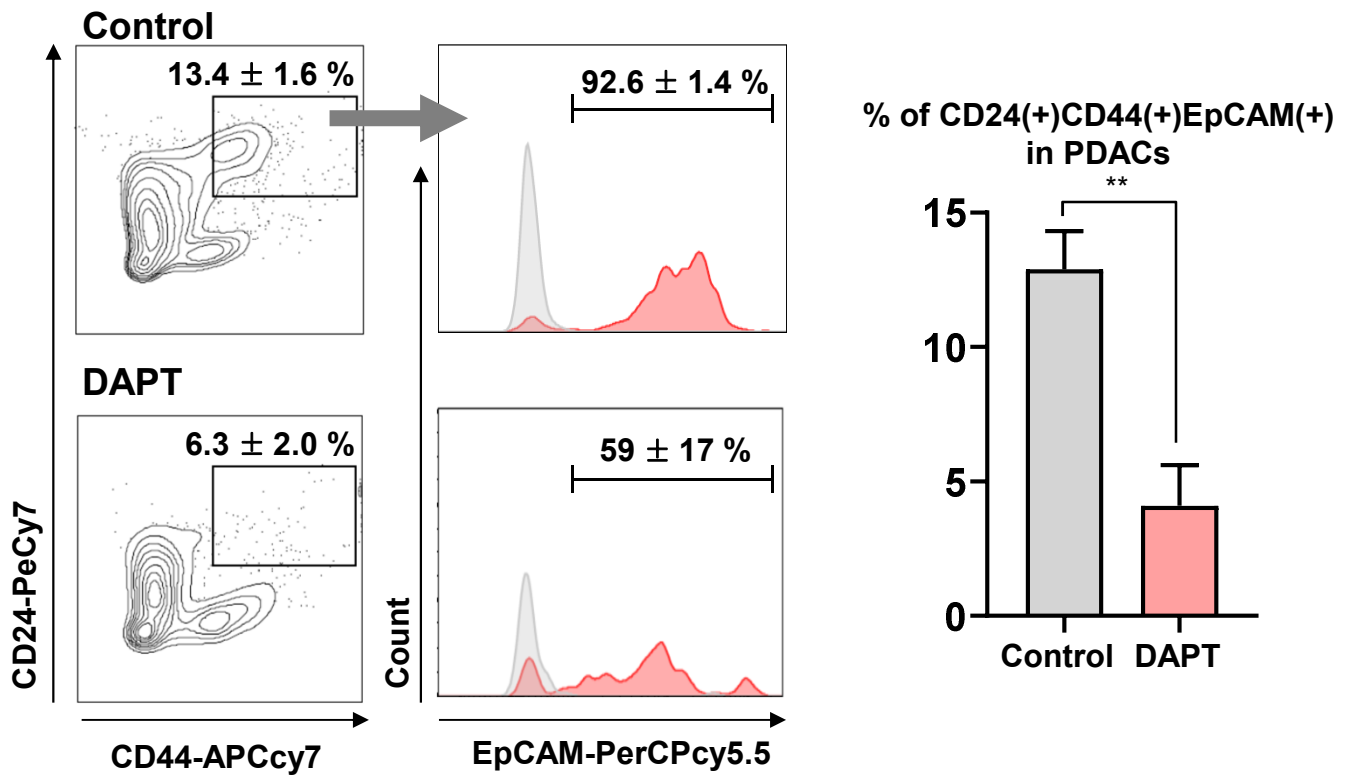

B

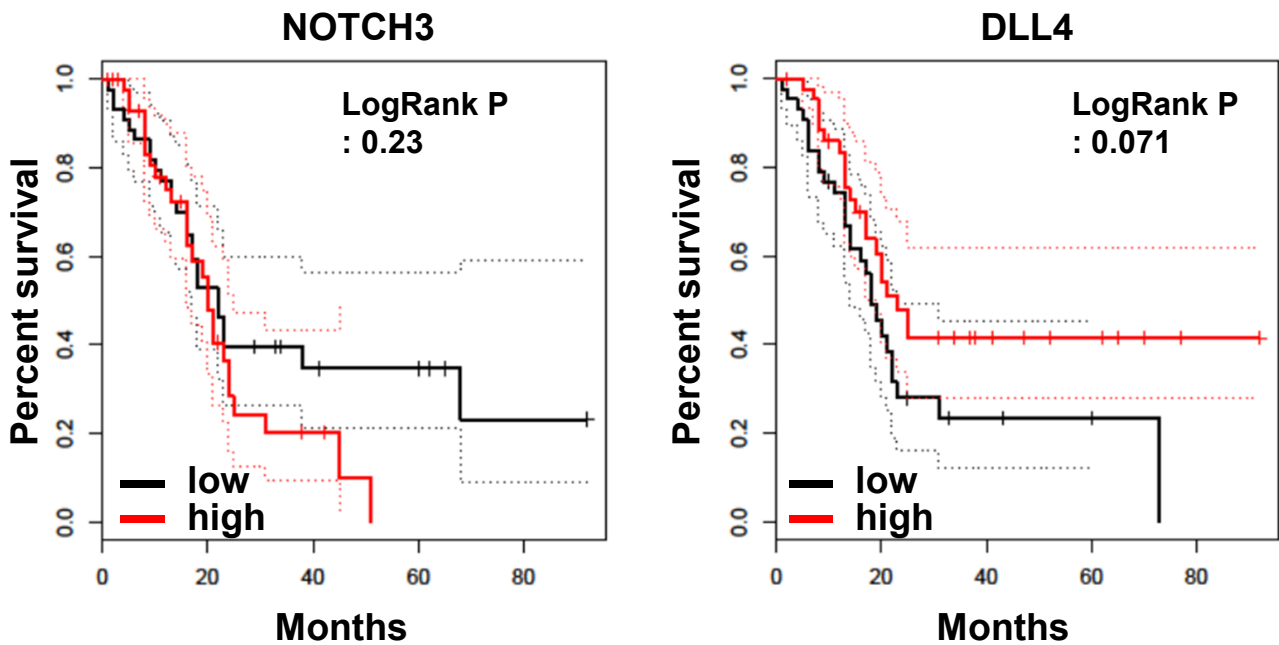

**Table S1. Donor information of pancreatic cancer organoid**

|          | Sex | Age | Source   | History |
|----------|-----|-----|----------|---------|
| Donor 1  | F   | 65  | EUS-FNA  | PDA     |
| Donor 2* | M   | 74  | Surgical | PDA     |
| Donor 3  | F   | 74  | Surgical | PDA     |
| Donor 4  | M   | 67  | Surgical | PDA     |
| Donor 5  | M   | 63  | Surgical | PDA     |
| Donor 6  | M   | 75  | Surgical | PDA     |
| Donor 7  | M   | 50  | Surgical | PDA     |
| Donor 8  | M   | 29  | Surgical | PDA     |

EUS-FNA = Endo-scopic Untrasound-Fine Needle Aspiration

PDA = Pancreatic ductal adenocarcinoma

\* = single cell RNAseq analysis

**Table S2. Differentially expressed gene list according to differentiation states by trajectory analysis**

| gene_ID   | State3 vs State1 | State3 vs State2 | State2 vs State1 |
|-----------|------------------|------------------|------------------|
| CA2       | 0.16809708       | 2.81168E-13      | 5.82493E-10      |
| CD44      | 4.28104E-15      | 0.00114374       | 5.92748E-08      |
| GCNT3     | 0.473258198      | 6.50302E-08      | 4.25932E-07      |
| TICAM1    | 0.122097983      | 4.00326E-10      | 1.22254E-06      |
| TSPAN3    | 0.169855064      | 5.5256E-08       | 2.38733E-05      |
| CTSE      | 0.197642949      | 6.46357E-07      | 3.90281E-05      |
| TUBB2A    | 0.022822143      | 6.4551E-09       | 4.86511E-05      |
| B4GALT4   | 0.952303037      | 0.000390032      | 0.000114002      |
| PTPRR     | 0.796368347      | 1.4909E-05       | 0.000123093      |
| RHPN2     | 0.681660701      | 0.000347655      | 0.000187234      |
| MMP15     | 0.700272433      | 0.00044363       | 0.000188609      |
| MUC13     | 0.211420717      | 5.91395E-07      | 0.000192119      |
| ABHD2     | 0.848286219      | 0.000991873      | 0.000219203      |
| RFLNA     | 0.889264534      | 0.000255036      | 0.000242943      |
| MUC5AC    | 0.248206361      | 0.016324282      | 0.000243446      |
| GSN       | 0.557945233      | 1.31523E-05      | 0.000248282      |
| ARID1A    | 0.855328142      | 0.000124633      | 0.000261058      |
| TIMP2     | 0.182174983      | 1.76348E-06      | 0.000284761      |
| TOX3      | 0.79037985       | 0.000156894      | 0.000315291      |
| KLF2      | 0.155684309      | 1.55148E-07      | 0.000319218      |
| PLL       | 0.371321105      | 0.001090849      | 0.00032301       |
| LINC02381 | 0.040734409      | 0.787630049      | 0.000414259      |
| B4GALNT3  | 0.343813532      | 0.028160356      | 0.000416693      |
| SYMPK     | 0.330520025      | 0.121182221      | 0.000473396      |
| CASP7     | 0.765761369      | 0.006211504      | 0.000499474      |
| FUT4      | 0.702149195      | 4.08769E-05      | 0.00051191       |
| PRKCD     | 0.538704424      | 0.008339402      | 0.000548366      |
| CAB39     | 0.365378009      | 0.032429057      | 0.000600763      |
| CLDN18    | 0.486552224      | 2.49273E-05      | 0.000608602      |
| HPGD      | 0.915593824      | 6.71074E-05      | 0.000610458      |
| SUGP2     | 0.423511271      | 0.051273173      | 0.000611221      |
| MUC17     | 0.237915735      | 3.36229E-06      | 0.000627581      |
| CLDN23    | 0.246426124      | 3.77568E-06      | 0.00062762       |
| CXADR     | 0.94378867       | 0.000319615      | 0.00068267       |
| MUC3A     | 0.436371467      | 5.57139E-05      | 0.000775906      |
| MUCL3     | 0.18263733       | 0.050965548      | 0.000780237      |
| LSR       | 0.436862232      | 0.000259013      | 0.000798489      |
| TSPAN8    | 0.275255621      | 9.4307E-06       | 0.000834502      |
| RAB8B     | 0.858850183      | 0.002349016      | 0.000846244      |
| LACTB     | 0.810625821      | 0.002211458      | 0.000879144      |

|           |             |             |             |
|-----------|-------------|-------------|-------------|
| AGR3      | 0.620397659 | 0.002867435 | 0.000900837 |
| BCAS1     | 0.804196344 | 0.001442077 | 0.000916434 |
| CGN       | 0.112716492 | 4.23281E-07 | 0.000944941 |
| SEMA4B    | 0.079029493 | 5.94674E-07 | 0.000977713 |
| HSPG2     | 0.170688524 | 5.87482E-06 | 0.001036614 |
| UPK1B     | 0.470738833 | 0.006106949 | 0.001051734 |
| PTPRG     | 0.862990938 | 0.000209718 | 0.00110429  |
| SPATS2L   | 0.077811525 | 3.49892E-06 | 0.00115375  |
| PKDCC     | 0.821802987 | 0.000632339 | 0.0012316   |
| GOLM1     | 0.045614796 | 1.42263E-06 | 0.001244035 |
| CEACAM5   | 0.192435265 | 5.42773E-06 | 0.001244898 |
| SAMD8     | 0.621402195 | 0.009936831 | 0.001290708 |
| CD164     | 0.025582454 | 8.94674E-08 | 0.001318038 |
| DUSP14    | 0.430552724 | 0.002189479 | 0.001355438 |
| FOXQ1     | 0.684844647 | 0.003418717 | 0.001397047 |
| JUP       | 0.004964668 | 1.36299E-07 | 0.00146832  |
| CCNQ      | 0.000173931 | 0.775763243 | 0.001644248 |
| FAM102B   | 0.945310684 | 0.000502095 | 0.001665508 |
| LATS2     | 0.021582483 | 2.82864E-06 | 0.001817099 |
| STEAP4    | 0.625322951 | 0.000417092 | 0.001918481 |
| KLK11     | 0.091817139 | 1.90034E-06 | 0.002035721 |
| MFN2      | 0.483370938 | 0.022969126 | 0.002064088 |
| IDH2      | 0.60236822  | 0.000443684 | 0.002084439 |
| ABO       | 0.384194521 | 0.053909905 | 0.002087491 |
| PDCD6IP   | 0.060576609 | 1.32128E-06 | 0.002116792 |
| RAB11FIP1 | 0.045473365 | 2.99851E-07 | 0.002184696 |
| ARHGEF37  | 0.002681518 | 0.251795368 | 0.002192555 |
| STX3      | 0.345973768 | 0.036974643 | 0.002333676 |
| S100P     | 0.54306624  | 0.087300489 | 0.002465976 |
| NUDT22    | 0.000584379 | 0.733557171 | 0.002550448 |
| TM4SF5    | 0.594121151 | 0.005706006 | 0.002866776 |
| CIB1      | 0.121480396 | 1.56162E-06 | 0.002899639 |
| DNAJC13   | 0.362606103 | 0.137642031 | 0.002912373 |
| RUNDC1    | 0.988328014 | 0.000679721 | 0.002987359 |
| DUSP8     | 0.104334908 | 1.17201E-06 | 0.003064673 |
| EPCAM     | 0.049774946 | 6.14615E-07 | 0.003084473 |
| BTNL8     | 0.751583479 | 0.002255414 | 0.00311427  |
| CSTA      | 0.058509543 | 0.478258069 | 0.003116004 |
| FHL2      | 0.880904694 | 0.000951957 | 0.003123012 |
| PAR6B     | 0.769149356 | 0.000969492 | 0.003161831 |
| ACHE      | 0.18210699  | 4.13063E-05 | 0.00317069  |
| TNFRSF21  | 0.210210381 | 9.59675E-06 | 0.003217628 |
| FOSL2     | 0.007662709 | 4.19641E-08 | 0.003276224 |

|          |             |             |             |
|----------|-------------|-------------|-------------|
| SCFD1    | 9.07731E-07 | 0.098749457 | 0.003341382 |
| DNAJB12  | 0.613635255 | 0.079883268 | 0.003400397 |
| TST      | 0.822657742 | 0.003837384 | 0.003423233 |
| ANKS4B   | 0.9999999   | 0.000586399 | 0.003609029 |
| MAL2     | 0.356746879 | 0.0002096   | 0.003647549 |
| YPEL5    | 0.101606972 | 3.50671E-05 | 0.003743159 |
| NTHL1    | 0.479076449 | 0.137480994 | 0.003780361 |
| TFF2     | 0.876944375 | 0.00896723  | 0.003856827 |
| TPRN     | 0.636134201 | 0.000680096 | 0.00391563  |
| CCT8     | 0.032993116 | 0.637085933 | 0.003923585 |
| KLF5     | 0.025865232 | 1.46194E-06 | 0.003982468 |
| LMO4     | 0.599115257 | 0.003537651 | 0.004091296 |
| SLC17A5  | 0.17813473  | 0.00014405  | 0.004107844 |
| DUOX2    | 0.045500548 | 1.18958E-05 | 0.004147361 |
| AKAP13   | 0.251612571 | 0.000191637 | 0.004216801 |
| PAQR8    | 0.679261754 | 0.00141447  | 0.004234176 |
| HACL1    | 0.019738167 | 0.247171006 | 0.004261434 |
| INSR     | 0.161190719 | 3.38212E-06 | 0.004320324 |
| MISP     | 0.026888182 | 1.57632E-06 | 0.004327357 |
| ERF      | 0.708476355 | 0.003742105 | 0.004333509 |
| ARHGEF11 | 0.822496322 | 0.001874727 | 0.004422457 |
| CPSF3    | 0.168778353 | 0.504457052 | 0.004536919 |
| DUSP4    | 0.415543476 | 0.000448933 | 0.004543724 |
| SIKE1    | 0.236519564 | 0.171477976 | 0.004694049 |
| PCDH7    | 0.019669052 | 0.498461605 | 0.004905702 |
| UBL3     | 0.726367795 | 0.001537366 | 0.00514264  |
| MFAP1    | 0.806785231 | 0.011937921 | 0.005144949 |
| GNAI1    | 0.740278798 | 0.02689425  | 0.005171111 |
| SAP30L   | 0.459247936 | 0.000314828 | 0.005309504 |
| PSMA3    | 0.015379172 | 0.725482066 | 0.005387847 |
| KBTBD11  | 0.15761362  | 0.024091363 | 0.0054276   |
| TYRO3    | 0.202558228 | 0.07768517  | 0.005452043 |
| ITPKC    | 0.874074152 | 0.000925008 | 0.005605211 |
| LYZ      | 0.210049048 | 0.000101211 | 0.005638408 |
| LPIN2    | 0.018302414 | 1.24361E-06 | 0.005682549 |
| OCLN     | 0.30828999  | 0.000392329 | 0.005763302 |
| CRB3     | 0.076416471 | 3.07874E-05 | 0.00583331  |
| ERRFI1   | 0.081367968 | 4.154E-05   | 0.005836815 |
| SLC9A1   | 0.98373725  | 0.003532771 | 0.00584573  |
| CXCL16   | 0.113508649 | 2.77201E-05 | 0.005870202 |
| OSTM1    | 0.942569994 | 0.004068704 | 0.005922088 |
| CNPY3    | 0.000741379 | 0.884955324 | 0.005935238 |
| WWC1     | 0.604423315 | 0.020178865 | 0.005963304 |



|            |             |             |             |
|------------|-------------|-------------|-------------|
| LZTR1      | 0.05244347  | 0.15194936  | 0.005992907 |
| PACSIN2    | 0.144473472 | 5.4282E-05  | 0.006070138 |
| NDUFA1     | 0.001089157 | 0.324539925 | 0.006191786 |
| NR2F2      | 0.056946733 | 1.81329E-06 | 0.006232111 |
| UGCG       | 0.36427346  | 0.000159083 | 0.006292856 |
| MRPL46     | 0.463148322 | 0.398184211 | 0.006384237 |
| SLPI       | 0.348828626 | 0.000626486 | 0.006393235 |
| RRP1B      | 0.025683508 | 0.716654537 | 0.00640134  |
| PTDSS2     | 0.273467997 | 0.034302113 | 0.006420744 |
| SLK        | 0.080185415 | 5.4233E-06  | 0.006433106 |
| PLEKHH2    | 0.234071412 | 0.293748514 | 0.006529961 |
| CYP2S1     | 0.590101925 | 0.00531822  | 0.006574808 |
| ARRDC4     | 0.341270506 | 0.000465104 | 0.00657526  |
| PPDPF      | 0.862123219 | 0.064426479 | 0.006622917 |
| WASL       | 0.217926471 | 0.000108465 | 0.006707446 |
| CYHR1      | 0.819860345 | 0.009171228 | 0.006728397 |
| EZR        | 0.057826631 | 7.38528E-06 | 0.006797655 |
| DDX28      | 0.0120331   | 0.292369522 | 0.006855574 |
| ABCB7      | 0.692658866 | 0.142946689 | 0.006986604 |
| AOC1       | 0.928022028 | 0.000947534 | 0.006996271 |
| ARHGAP27   | 0.864982558 | 0.007062365 | 0.007025739 |
| LGALS9C    | 0.555786339 | 0.074594303 | 0.007070612 |
| MYD88      | 0.124353967 | 1.15243E-05 | 0.007088124 |
| ST14       | 0.047702267 | 2.617E-05   | 0.007089604 |
| PCDH1      | 0.750090209 | 0.00163273  | 0.007097856 |
| MTERF4     | 0.129445833 | 0.402771923 | 0.00713409  |
| POR        | 0.077428418 | 1.29196E-05 | 0.00725301  |
| HCST       | 0.087794173 | 0.043266136 | 0.007290374 |
| WASHC2C    | 0.324071451 | 7.7007E-05  | 0.007497446 |
| PEBP1      | 0.363788793 | 0.066814964 | 0.007535363 |
| GRN        | 0.30016856  | 0.000704193 | 0.00779121  |
| ISG20      | 0.052394972 | 5.13355E-07 | 0.007883645 |
| AC092683.1 | 0.011685944 | 0.440624641 | 0.00790828  |
| GLIPR1     | 0.627211019 | 0.270735928 | 0.007923145 |
| C19orf24   | 0.000920054 | 0.424010363 | 0.007978716 |
| NFKBIL1    | 0.540113361 | 0.000917474 | 0.008021778 |
| OGFOD3     | 0.124666294 | 0.165177088 | 0.008110084 |
| MED29      | 0.52053577  | 0.001264525 | 0.008119662 |
| SECTM1     | 0.433869272 | 0.000583776 | 0.008207624 |
| IGSF6      | 0.888665799 | 0.239368177 | 0.008207834 |
| MACC1      | 0.827616835 | 0.005536415 | 0.00824928  |
| ADAM9      | 0.068896098 | 1.62129E-05 | 0.008327033 |
| HACD3      | 0.171340489 | 0.570304923 | 0.008431413 |

|          |             |             |             |
|----------|-------------|-------------|-------------|
| SPNS2    | 0.413277321 | 0.002007514 | 0.00847418  |
| SMIM13   | 0.041123862 | 0.623170127 | 0.008531117 |
| NOL4L    | 0.363920393 | 0.066639127 | 0.008581991 |
| SLC6A20  | 0.873279185 | 0.005822573 | 0.008604324 |
| CD82     | 0.223489373 | 0.000112007 | 0.0086087   |
| FAM110C  | 0.161974324 | 0.180940304 | 0.008681885 |
| LIF      | 0.737277803 | 0.00188609  | 0.008705602 |
| SSH2     | 0.123626931 | 0.303955529 | 0.008734585 |
| L3MBTL2  | 0.312346667 | 0.000155931 | 0.008836591 |
| FXD3     | 0.527670409 | 0.001592903 | 0.008839252 |
| NOM1     | 0.012623099 | 0.70288185  | 0.009141607 |
| HSPB1    | 0.621911167 | 0.004041873 | 0.009145477 |
| RBM47    | 0.334752806 | 0.000422918 | 0.009385859 |
| NPC2     | 0.362076349 | 0.000372921 | 0.009554141 |
| RETREG1  | 0.750351216 | 0.027358969 | 0.009693845 |
| YWHAG    | 0.585978395 | 0.001786415 | 0.009712408 |
| TIMM29   | 0.813834924 | 0.006908915 | 0.009777822 |
| EFCAB14  | 0.928162328 | 0.016293769 | 0.009795257 |
| PPM1A    | 0.835769978 | 0.0142572   | 0.009819063 |
| NUP50-DT | 0.498229361 | 0.10110062  | 0.00984274  |
| NSUN4    | 0.0160149   | 3.53663E-05 | 0.009872595 |
| BTF3L4   | 0.091693598 | 0.976837351 | 0.00997396  |
| BCL2L1   | 0.069310332 | 1.81881E-05 | 0.010028421 |
| KDM4C    | 0.001657093 | 0.873071744 | 0.010072188 |
| DHRS12   | 0.744274752 | 0.226938859 | 0.010090347 |
| INPP1    | 0.182346215 | 9.86694E-05 | 0.010099568 |
| RNASE1   | 0.512691726 | 0.001435517 | 0.010103137 |
| FOXO4    | 0.401299575 | 0.024788201 | 0.010106164 |
| ASAH1    | 0.130066971 | 0.000101282 | 0.010153036 |
| CCDC68   | 0.58724455  | 0.000788297 | 0.010238416 |
| CABLES1  | 0.326680773 | 0.00053512  | 0.010275801 |
| AQR      | 0.934443513 | 0.004553247 | 0.010514727 |
| KLF3     | 0.006378798 | 1.98676E-07 | 0.0105262   |
| PRSS16   | 0.18301986  | 0.863998954 | 0.010549159 |
| MTFR2    | 0.002984963 | 0.415229678 | 0.010600502 |
| SOCS6    | 0.571326407 | 0.00207075  | 0.010649179 |
| PLOD3    | 0.627983255 | 0.003018244 | 0.010724814 |
| MICALL1  | 0.002334979 | 0.949022233 | 0.010767324 |
| JUND     | 0.07300593  | 3.66074E-05 | 0.010826877 |
| RHOB     | 0.042150613 | 1.55206E-05 | 0.01102492  |
| PKM      | 0.032497148 | 0.351882195 | 0.011030604 |
| CCDC85C  | 0.257101698 | 3.63013E-05 | 0.011122946 |
| SRI      | 0.930568736 | 0.03093297  | 0.011216815 |

|          |             |             |             |
|----------|-------------|-------------|-------------|
| VSIG2    | 0.914597382 | 0.015245899 | 0.011252634 |
| INTS3    | 0.467826186 | 0.070504862 | 0.011374395 |
| BRD1     | 0.316390661 | 0.000331415 | 0.011398792 |
| GSKIP    | 0.42975924  | 0.00133705  | 0.011404046 |
| SPTBN1   | 0.147932993 | 5.14999E-05 | 0.011450953 |
| TMEM30B  | 0.042943776 | 1.115E-05   | 0.011463873 |
| KIF2A    | 0.296788296 | 0.201176405 | 0.011548671 |
| CISD3    | 0.630492235 | 0.0723808   | 0.011597344 |
| UBALD1   | 0.055193544 | 0.355082422 | 0.011688681 |
| RMDN3    | 0.650785843 | 0.068139351 | 0.011817493 |
| MED15    | 0.423585657 | 0.001229393 | 0.012068377 |
| D2HGDH   | 0.381620064 | 0.358602841 | 0.012263518 |
| PLCD3    | 0.44272509  | 0.001612256 | 0.012346449 |
| SCARB2   | 0.222910351 | 0.000416633 | 0.012454131 |
| TNFAIP1  | 0.440710624 | 0.00163358  | 0.01258893  |
| FRA10AC1 | 0.087061027 | 0.628710557 | 0.012704578 |
| ALDH1A3  | 0.210619974 | 0.108770903 | 0.012732652 |
| TOB1     | 0.421427033 | 0.001514543 | 0.012878556 |
| UBE3C    | 0.189217807 | 0.00019104  | 0.012913378 |
| REX1BD   | 0.049772513 | 0.753030867 | 0.013027101 |
| CYTH2    | 0.057293935 | 2.85423E-05 | 0.013077501 |
| RBP1     | 0.868454613 | 0.360047401 | 0.013111599 |
| NASP     | 0.060356463 | 0.562399909 | 0.013187884 |
| LASP1    | 0.024145911 | 1.23017E-06 | 0.013259719 |
| PXDC1    | 0.800517003 | 0.028086859 | 0.013318236 |
| TRNP1    | 0.370704599 | 0.114693649 | 0.01333699  |
| ARHGAP12 | 0.256199507 | 0.000189343 | 0.013375652 |
| HLA-DMB  | 0.050686006 | 5.57686E-06 | 0.013408109 |
| TENT5A   | 0.239634569 | 0.000128006 | 0.013431117 |
| PSCA     | 0.163742442 | 0.141895721 | 0.013435287 |
| CTSA     | 0.050044651 | 2.09981E-05 | 0.013447898 |
| ARL3     | 0.086761186 | 0.26202063  | 0.013448857 |
| SNRPA    | 0.015525681 | 0.693805658 | 0.013490481 |
| ABCC1    | 0.000117331 | 0.243257335 | 0.01351958  |
| C17orf49 | 0.687796539 | 0.415229678 | 0.013520353 |
| MARVELD3 | 0.270401034 | 9.12756E-05 | 0.013734872 |
| FA2H     | 0.89368581  | 0.00606664  | 0.013842365 |
| PRKX     | 0.933544632 | 0.363358927 | 0.013869776 |
| LCOR     | 0.347999873 | 0.000989004 | 0.013992158 |
| ZSWIM6   | 0.682575414 | 0.051146176 | 0.013992542 |
| CPD      | 0.684589928 | 0.006848087 | 0.014003435 |
| ZBTB7A   | 0.148129374 | 0.000248806 | 0.014041417 |
| TPM1     | 0.108713358 | 2.8214E-05  | 0.014082656 |

|            |             |             |             |
|------------|-------------|-------------|-------------|
| MYO19      | 0.053741405 | 0.367286609 | 0.014091689 |
| SLC9A3R1   | 0.596243626 | 0.003472346 | 0.014270533 |
| RAB29      | 0.037454116 | 0.52647894  | 0.014287276 |
| ATRX       | 9.25577E-05 | 0.082313442 | 0.014377775 |
| VIL1       | 0.28517736  | 0.038762786 | 0.014577361 |
| TMEM256    | 0.180047412 | 0.369144791 | 0.014633377 |
| H1FO       | 0.022203679 | 5.51081E-06 | 0.014659966 |
| DYRK2      | 0.85660082  | 0.005197073 | 0.014817407 |
| VAV2       | 0.656634686 | 0.019149516 | 0.014910898 |
| GIT1       | 0.884043927 | 0.019626395 | 0.014966221 |
| GNAQ       | 0.804044623 | 0.008854018 | 0.014998869 |
| HOXB2      | 0.004485133 | 0.975866106 | 0.015038951 |
| MIDN       | 0.009746084 | 2.16234E-06 | 0.015136023 |
| ABCC3      | 0.152115117 | 0.369832686 | 0.015199234 |
| MVD        | 0.006267426 | 0.777384966 | 0.015202492 |
| MMP25      | 0.111434906 | 0.577631125 | 0.015224749 |
| TMED7      | 0.242336809 | 0.00036486  | 0.015356335 |
| CRIM1      | 0.050782127 | 1.47209E-05 | 0.015444217 |
| SLC9A3     | 0.679376798 | 0.003390105 | 0.015470966 |
| FAM3B      | 0.726849016 | 0.005524894 | 0.015619423 |
| DNAJC24    | 0.001986291 | 0.615794728 | 0.015692816 |
| LRRC1      | 0.182077328 | 0.000156863 | 0.015697952 |
| AC020916.1 | 0.515237057 | 0.003424773 | 0.015721046 |
| MCU        | 0.144264462 | 0.000185578 | 0.015771215 |
| DUSP1      | 0.116927804 | 9.85713E-05 | 0.015837206 |
| ANXA11     | 0.120827753 | 3.09801E-05 | 0.015983421 |
| SLC45A4    | 0.30167655  | 0.001608437 | 0.01601246  |
| CDH17      | 0.71610373  | 0.01569697  | 0.016196317 |
| RHOA       | 0.607728074 | 0.001714303 | 0.016201242 |
| BLMH       | 0.430179157 | 0.325941265 | 0.016242061 |
| BRAT1      | 0.386713313 | 0.334171155 | 0.016287363 |
| ESRP2      | 0.502276086 | 0.062586595 | 0.016336131 |
| DUSP6      | 0.068730169 | 6.24513E-05 | 0.01645286  |
| NUP107     | 0.971036075 | 0.222459284 | 0.016546067 |
| LMAN2L     | 0.66347249  | 0.041008282 | 0.016622201 |
| RABEP2     | 0.059103838 | 0.329864039 | 0.016998884 |
| MTHFD2L    | 0.211940047 | 0.376863112 | 0.017032819 |
| AC021218.1 | 0.518196704 | 0.086512621 | 0.017066406 |
| DPP8       | 0.023792482 | 2.17304E-05 | 0.017141159 |
| MSH3       | 0.50811831  | 0.249865923 | 0.017206335 |
| CKAP2      | 0.113012679 | 0.205582839 | 0.017207762 |
| NDUFAF2    | 0.056726634 | 0.573809342 | 0.017289019 |
| MAP1LC3B   | 0.00031855  | 2.52167E-08 | 0.017369705 |

|           |             |             |             |
|-----------|-------------|-------------|-------------|
| ZNF217    | 0.112842011 | 0.000161526 | 0.017381657 |
| CASC4     | 0.292984195 | 0.000259342 | 0.017434212 |
| BANF1     | 0.105329129 | 0.418672024 | 0.017436125 |
| FOS       | 0.061986809 | 1.9932E-05  | 0.017438131 |
| TFDP2     | 0.598809615 | 0.398792658 | 0.017519413 |
| MATR3.1   | 0.184247139 | 0.64068054  | 0.017539587 |
| ZNF3      | 0.206066751 | 0.118790134 | 0.017544505 |
| ZNF432    | 0.53313191  | 0.123000316 | 0.017624751 |
| EIF4G3    | 3.04474E-05 | 0.040280506 | 0.017649059 |
| SLC37A1   | 0.233578736 | 0.00027317  | 0.017689837 |
| C7orf43   | 0.404436032 | 0.384935246 | 0.017701487 |
| MYO1E     | 0.054236974 | 3.97148E-06 | 0.017704217 |
| CAPN5     | 0.420870056 | 0.001179244 | 0.017830578 |
| TMEM135   | 0.629153617 | 0.035210002 | 0.01811971  |
| TM4SF4    | 0.946360202 | 0.023939756 | 0.018128884 |
| RUNX1     | 0.544748963 | 0.00321561  | 0.01825946  |
| VAR5      | 0.061858234 | 0.338086942 | 0.018267132 |
| DUSP3     | 0.72142064  | 0.064104325 | 0.01837001  |
| TCEAL8    | 0.637402171 | 0.094397981 | 0.018423236 |
| SETDB2    | 0.798856371 | 0.353762929 | 0.018440204 |
| FOXO1     | 0.127963844 | 8.49791E-05 | 0.01859526  |
| NRBF2     | 0.542599766 | 0.139785662 | 0.01870874  |
| HSPB11    | 0.196286735 | 0.816796286 | 0.018765181 |
| ABHD11    | 0.161171378 | 0.000248331 | 0.019001825 |
| ASCC1     | 0.87256635  | 0.151397588 | 0.019048261 |
| MRPS21    | 0.027880925 | 0.994913453 | 0.019053201 |
| RNF19A    | 0.122813945 | 2.84956E-05 | 0.019096584 |
| EHBP1     | 0.009726733 | 0.952625717 | 0.019142831 |
| CANT1     | 0.121170621 | 0.000440092 | 0.019306644 |
| TRIM41    | 0.545366444 | 0.043347565 | 0.019453088 |
| ENTPD5    | 0.827226691 | 0.01690206  | 0.019479271 |
| MAP7      | 0.280618034 | 0.000824959 | 0.019493839 |
| SIK1B     | 0.849530689 | 0.004918559 | 0.01949384  |
| ITPKA     | 0.460717139 | 0.124627874 | 0.019546098 |
| CERS2     | 0.514132555 | 0.003182977 | 0.019714254 |
| ALDH9A1   | 0.235508148 | 0.358895134 | 0.019724176 |
| ATF3      | 0.003612921 | 1.32725E-07 | 0.019749317 |
| GNPDA1    | 0.667867797 | 0.043685929 | 0.01998563  |
| HIST1H2AC | 0.348833458 | 0.002853075 | 0.020021004 |
| RNF11     | 0.602963889 | 0.004111144 | 0.020104305 |
| R3HDM2    | 0.324954452 | 0.290865292 | 0.020119967 |
| DDR1      | 0.163454769 | 0.000446214 | 0.020272602 |
| TMEM37    | 0.266128883 | 0.000571732 | 0.020297975 |

|            |             |             |             |
|------------|-------------|-------------|-------------|
| NUP37      | 0.000486038 | 0.34390798  | 0.020398428 |
| STK39      | 0.822794213 | 0.006613635 | 0.020457287 |
| BX255925.3 | 0.218613495 | 0.000554982 | 0.020489249 |
| MTCH2      | 0.954459645 | 0.082866548 | 0.020543233 |
| RAB22A     | 0.128302049 | 0.000375384 | 0.020559819 |
| RBM10      | 0.000483224 | 0.170173791 | 0.020587195 |
| TDG        | 0.007567716 | 0.857516739 | 0.020591618 |
| DBN1       | 0.132503914 | 0.307905205 | 0.020706704 |
| NTN4       | 0.43502814  | 0.003402882 | 0.020735627 |
| MYO15B     | 0.247695818 | 0.000148956 | 0.020779116 |
| PIK3CG     | 0.02236426  | 0.254662063 | 0.020839147 |
| SLC38A10   | 0.184816967 | 0.000458496 | 0.020916516 |
| PRMT1      | 0.080127032 | 0.799214191 | 0.021008374 |
| FMO5       | 0.441321587 | 0.044409325 | 0.021014578 |
| NOL9       | 0.04262408  | 0.453689805 | 0.02108488  |
| STX7       | 0.134684527 | 0.000253616 | 0.02108609  |
| FAM13B     | 0.033509198 | 0.967596988 | 0.02112443  |
| ARPC1B     | 0.050545153 | 0.846622961 | 0.021144292 |
| PRR13      | 0.587816653 | 0.006154835 | 0.021279712 |
| SNX9       | 0.384915461 | 0.002290143 | 0.021279912 |
| NEK3       | 0.005836303 | 0.976378487 | 0.021434695 |
| FUT2       | 0.088704607 | 7.61125E-05 | 0.021434764 |
| GPR108     | 0.42896575  | 0.001278214 | 0.021536416 |
| RGL1       | 0.206522766 | 0.920649543 | 0.021545004 |
| SERPINB9   | 0.028316126 | 0.932849743 | 0.021690015 |
| METTL15    | 0.670348165 | 0.006898288 | 0.02169654  |
| SCD        | 0.019216568 | 0.47202912  | 0.021775886 |
| AMDHD2     | 0.276439576 | 0.192545615 | 0.021808601 |
| FYCO1      | 0.910086543 | 0.008606324 | 0.021846038 |
| B3GNT7     | 0.736345393 | 0.133043574 | 0.021919438 |
| ANAPC5     | 0.153984469 | 0.520106786 | 0.021972485 |
| SMPD3      | 0.571162486 | 0.002698399 | 0.02215642  |
| EBPL       | 0.016363039 | 0.932096074 | 0.022410859 |
| CHST4      | 0.549336157 | 0.005046451 | 0.02245312  |
| ANKRD29    | 0.069875381 | 0.000120984 | 0.022468765 |
| SFT2D1     | 0.964160363 | 0.055867631 | 0.022513402 |
| CDH3       | 0.000147614 | 0.079023581 | 0.02258018  |
| GRAMD2B    | 0.59525104  | 0.039079146 | 0.022677647 |
| DVL3       | 0.066602076 | 0.000247136 | 0.022917003 |
| RAB11A     | 0.292819696 | 0.001940423 | 0.022934731 |
| RAVER2     | 0.598263326 | 0.003641527 | 0.022957223 |
| SLCO2A1    | 0.637329986 | 0.003352653 | 0.022993813 |
| AGAP1      | 0.79544653  | 0.025885677 | 0.02305792  |

|            |             |             |             |
|------------|-------------|-------------|-------------|
| SYTL2      | 0.599467436 | 0.275207827 | 0.023142762 |
| NPAS1      | 0.267167124 | 0.483367428 | 0.023180249 |
| SCRN1      | 0.120766983 | 0.000319704 | 0.023187045 |
| CLRN3      | 0.238041559 | 0.32527635  | 0.023291451 |
| RIOK3      | 0.243173097 | 0.000680788 | 0.023577463 |
| AC007952.4 | 0.692844841 | 0.120437077 | 0.023597339 |
| UBR5       | 0.029416672 | 0.832185911 | 0.023951217 |
| TUBG1      | 0.127909073 | 0.524725765 | 0.023965445 |
| TUFT1      | 0.011033659 | 2.34073E-05 | 0.024249836 |
| UBE4A      | 0.03826263  | 3.62058E-05 | 0.024278672 |
| IFI44L     | 0.001032784 | 0.358986359 | 0.024316658 |
| TSPAN1     | 0.216779299 | 0.00056886  | 0.024336405 |
| NCOA4      | 0.270218391 | 0.000904742 | 0.024343018 |
| DOK2       | 0.095652649 | 0.2286996   | 0.024514524 |
| TBCB       | 0.136070185 | 0.393850447 | 0.024711279 |
| RHOBTB1    | 0.085710271 | 0.000193646 | 0.024728917 |
| CEACAM6    | 0.072587694 | 0.000146424 | 0.024771491 |
| ZFP36L2    | 0.038139294 | 4.16821E-06 | 0.024789222 |
| DDX23      | 0.032920644 | 1.44063E-06 | 0.024835899 |
| EXOC8      | 0.831721406 | 0.002766298 | 0.024979523 |
| TRMT10C    | 0.000366142 | 0.226792155 | 0.025016212 |
| MSRB2      | 0.763102097 | 0.022633604 | 0.025153517 |
| NIT2       | 0.001302617 | 0.162679143 | 0.025155407 |
| ACTR3C     | 0.234231578 | 0.120844576 | 0.025244399 |
| PRR15L     | 0.547907849 | 0.002755413 | 0.025285196 |
| C21orf2    | 0.090883927 | 0.380863066 | 0.02535268  |
| CCNL2      | 0.007195752 | 0.760937014 | 0.025502502 |
| CCL15      | 0.22429483  | 0.331166084 | 0.025514535 |
| RIPK4      | 0.11606726  | 0.000233104 | 0.025518542 |
| ALDH3B1    | 0.574369362 | 0.050484007 | 0.025632317 |
| WASHC5     | 0.188010362 | 0.855422938 | 0.025737775 |
| WDR24      | 0.235243156 | 0.000665761 | 0.025857029 |
| UBAP2L     | 0.808645481 | 0.120030001 | 0.025861076 |
| IWS1       | 0.996712658 | 0.050202844 | 0.025896297 |
| PHF2       | 0.3598804   | 0.002613387 | 0.025910695 |
| RNF130     | 0.352085525 | 0.624271724 | 0.025978694 |
| DPP4       | 0.130939283 | 0.000506084 | 0.026007468 |
| TMA16      | 0.515029168 | 0.374813774 | 0.026010225 |
| NCK2       | 0.757596397 | 0.272241959 | 0.026024131 |
| USP8       | 0.814554243 | 0.022924874 | 0.026096081 |
| FAM171A1   | 0.433606993 | 0.362710236 | 0.026102954 |
| WDR74      | 0.08394985  | 0.530965352 | 0.026131438 |
| MESD       | 0.009981378 | 3.77078E-06 | 0.026253483 |

|          |             |             |             |
|----------|-------------|-------------|-------------|
| MRPS27   | 0.008536099 | 0.881539508 | 0.026304777 |
| SLC35E2A | 0.842544955 | 0.339959599 | 0.026352265 |
| LDLR     | 0.215839112 | 0.000113194 | 0.026365155 |
| LGR4     | 0.161116537 | 0.000273721 | 0.026369464 |
| SLC15A3  | 0.173083202 | 0.00038074  | 0.026422002 |
| FKRP     | 0.004781931 | 0.752472013 | 0.026457686 |
| TIMM17A  | 0.020989492 | 0.78791926  | 0.026499317 |
| EBP      | 0.043459347 | 0.789908776 | 0.026526739 |
| GAPDH    | 0.039187714 | 0.455908982 | 0.026574188 |
| PPP3CC   | 0.777584693 | 0.09662428  | 0.026634539 |
| BMP2     | 0.216333889 | 0.000627548 | 0.026804092 |
| CCL28    | 0.197365507 | 0.000357486 | 0.026890951 |
| PLAT     | 0.003526778 | 0.611568431 | 0.026997763 |
| TGFA     | 0.602787135 | 0.003382091 | 0.027021544 |
| KCTD3    | 0.627333245 | 0.007542003 | 0.027169581 |
| WHAMM    | 0.199379745 | 0.000710601 | 0.027237995 |
| FILIP1L  | 0.149079746 | 0.445034325 | 0.027334099 |
| ZNF512   | 0.191158049 | 0.415229678 | 0.027429119 |
| TMEM185B | 0.768874789 | 0.006888261 | 0.027659999 |
| UBE4B    | 0.534159197 | 0.135931927 | 0.027673732 |
| C3orf58  | 0.401299575 | 0.01915491  | 0.027829078 |
| CREB3L1  | 0.418745993 | 0.00383996  | 0.027973693 |
| CHPT1    | 0.816480272 | 0.062722611 | 0.028013618 |
| ESYT1    | 0.01501225  | 0.986178089 | 0.028061331 |
| SREK1    | 0.464319953 | 0.44025864  | 0.028460484 |
| TMED10   | 0.574136862 | 0.004630132 | 0.028485515 |
| CAPN9    | 0.658521231 | 0.044686166 | 0.028492954 |
| ZFP64    | 0.68417533  | 0.25216226  | 0.02849796  |
| AXIN1    | 0.008744264 | 0.902805031 | 0.028550281 |
| CRIP1    | 0.694736885 | 0.018787982 | 0.028577089 |
| ZNF532   | 0.007627788 | 0.908886132 | 0.028691239 |
| CEP120   | 0.908557576 | 0.023933756 | 0.02874441  |
| RAB12    | 0.697103799 | 0.011800011 | 0.028776098 |
| PIH1D1   | 0.091093071 | 0.547186999 | 0.02888347  |
| CTNNB1   | 0.628087035 | 0.008328992 | 0.029010113 |
| ANKS3    | 0.027212298 | 0.415229678 | 0.02909427  |
| MAP3K21  | 0.176056434 | 0.593385431 | 0.029122558 |
| VSIR     | 0.097227027 | 4.03186E-05 | 0.029149893 |
| PTPN4    | 0.109485868 | 0.60853106  | 0.02924718  |
| ABHD3    | 0.657907575 | 0.008872531 | 0.029282611 |
| MSMB     | 0.484821275 | 0.018028424 | 0.029367526 |
| C8orf76  | 0.364607427 | 0.00183599  | 0.029424811 |
| TMEM134  | 0.874706073 | 0.020047089 | 0.029466594 |



|            |             |             |             |
|------------|-------------|-------------|-------------|
| EPS8       | 0.008343151 | 1.52644E-05 | 0.029475307 |
| DEPP1      | 0.416339342 | 0.003052099 | 0.029551484 |
| CPEB2      | 0.462205107 | 0.164476987 | 0.029584055 |
| MYADM      | 0.000220928 | 0.116981445 | 0.029590235 |
| SPSB1      | 0.008794384 | 0.876051106 | 0.029687573 |
| GTPBP1     | 0.693482688 | 0.151033987 | 0.029736769 |
| CCDC159    | 0.163090191 | 0.291811353 | 0.029928621 |
| RABAC1     | 0.036352589 | 0.837008708 | 0.029985311 |
| RPF2       | 0.666852035 | 0.147553991 | 0.029992484 |
| THAP3      | 0.002377164 | 0.40341115  | 0.030071756 |
| STK38L     | 0.667033849 | 0.197546675 | 0.03010734  |
| LINC00342  | 0.000953936 | 0.23001642  | 0.03013871  |
| WDR20      | 0.946544879 | 0.011705609 | 0.030145556 |
| PVR        | 0.124629153 | 0.000257655 | 0.030319331 |
| PIP5K1A    | 0.591812281 | 0.007338104 | 0.030329862 |
| ITGA1      | 0.031605165 | 0.806898493 | 0.030529636 |
| SMCO2      | 0.008385999 | 0.9999999   | 0.030534065 |
| RGS19      | 0.013125283 | 0.935103339 | 0.030602656 |
| GCSH       | 0.934911491 | 0.150839648 | 0.03064826  |
| BLOC1S1    | 0.759530061 | 0.014933115 | 0.030728933 |
| DPY30      | 0.007981729 | 0.623496109 | 0.03078516  |
| LINC02001  | 0.502116445 | 0.415229678 | 0.030787255 |
| GPBAR1     | 0.358667164 | 0.169998577 | 0.030787407 |
| TMEM128    | 0.522188954 | 0.003547255 | 0.030852442 |
| CHCHD4     | 0.430836543 | 0.199341747 | 0.030929379 |
| MIRLET7BHG | 0.018933912 | 0.8166734   | 0.03097033  |
| RAB3GAP1   | 0.748007847 | 0.020951311 | 0.031140705 |
| FRK        | 0.351826819 | 0.001939559 | 0.031182961 |
| TXK        | 0.071539944 | 0.249441007 | 0.031193465 |
| MPP3       | 0.008652843 | 0.9999999   | 0.031216885 |
| SCAND1     | 0.249118327 | 0.000600172 | 0.031272734 |
| TMEM70     | 0.178611082 | 0.285764639 | 0.031340087 |
| TJP3       | 0.460234346 | 0.004062675 | 0.031356729 |
| ZBED1      | 0.593391628 | 0.009711088 | 0.0314028   |
| MIB2       | 0.008450293 | 0.989077107 | 0.031414373 |
| NISCH      | 0.597243069 | 0.097985178 | 0.031468041 |
| DNAJC3-DT  | 0.016028624 | 0.757286534 | 0.031513022 |
| MLLT6      | 0.002284424 | 0.379892115 | 0.031536826 |
| NAA30      | 0.263817392 | 0.59523031  | 0.031605031 |
| ERCC1      | 0.074349006 | 0.773761436 | 0.031719582 |
| OPA3       | 0.397582974 | 0.041605243 | 0.031744883 |
| TACC2      | 0.894343308 | 0.018341742 | 0.03178447  |
| NDUFB11    | 0.268064231 | 0.429075788 | 0.031854877 |

|          |             |             |             |
|----------|-------------|-------------|-------------|
| SLC4A2   | 0.597743867 | 0.171616112 | 0.031872255 |
| PELI2    | 0.96286259  | 0.016599886 | 0.031883107 |
| MARCKS   | 0.057780622 | 4.72268E-05 | 0.031960114 |
| LTB4R    | 0.0151836   | 0.415229678 | 0.032013331 |
| CD55     | 0.002627975 | 1.30179E-07 | 0.032041914 |
| RHOA     | 0.195524511 | 0.000178351 | 0.032088579 |
| SRM      | 0.112217972 | 0.577388281 | 0.0321198   |
| GIT2     | 0.234348463 | 0.746481625 | 0.032237479 |
| DNAJC5   | 0.941794308 | 0.056874867 | 0.032242151 |
| SLBP     | 0.046668471 | 0.795318175 | 0.032280048 |
| IRS1     | 0.5099064   | 0.006768962 | 0.032314758 |
| CLDND1   | 0.139439345 | 0.333312909 | 0.032530737 |
| ZNF559   | 0.401299575 | 0.02441866  | 0.032558023 |
| C2CD4B   | 0.193367509 | 0.156382599 | 0.03264164  |
| HADHB    | 0.004680875 | 0.558636532 | 0.032648801 |
| P3H1     | 0.074739241 | 0.463678098 | 0.032673628 |
| SARNP    | 0.376572494 | 0.881898055 | 0.032770684 |
| COPE     | 0.00650923  | 0.472956091 | 0.032843017 |
| C9orf64  | 0.265064584 | 0.002118584 | 0.032882877 |
| RFX5     | 0.415361122 | 0.003592793 | 0.032948074 |
| CYP2C18  | 0.014679218 | 4.19015E-05 | 0.032974023 |
| TUSC1    | 0.239003352 | 0.001988422 | 0.033013174 |
| WNT7B    | 0.042820395 | 0.633352713 | 0.033176223 |
| SAV1     | 0.131619233 | 0.000879114 | 0.03328458  |
| TUBA1A   | 0.02395565  | 0.570035739 | 0.033440398 |
| E2F3     | 0.000626776 | 0.219300141 | 0.033516766 |
| ADM      | 0.944230979 | 0.024267624 | 0.033516922 |
| METRNL   | 0.339518614 | 0.002778295 | 0.033551888 |
| P4HTM    | 0.696403702 | 0.006850024 | 0.033668564 |
| SMC2     | 0.858236973 | 0.091324284 | 0.033701881 |
| CCDC186  | 0.078652919 | 9.04353E-05 | 0.033821551 |
| METTL26  | 0.592181423 | 0.104841401 | 0.033822306 |
| EDEM2    | 0.025375454 | 0.891132106 | 0.033862395 |
| CFI      | 0.17211621  | 0.147659783 | 0.033914006 |
| CDCP1    | 0.024746414 | 2.78418E-05 | 0.033959059 |
| ABCD1    | 0.563337142 | 0.005846667 | 0.033990217 |
| PML      | 0.000106065 | 0.051920656 | 0.034041398 |
| TMEM126B | 0.663154308 | 0.320284318 | 0.034086474 |
| MEPCE    | 0.001347289 | 0.2636443   | 0.034129349 |
| C2CD4A   | 0.105018494 | 0.157248687 | 0.03414376  |
| FAM104A  | 0.940069758 | 0.080040408 | 0.03419378  |
| FLNA     | 0.007697484 | 0.702052133 | 0.034199863 |
| PKP2     | 0.449921356 | 0.103555004 | 0.034255879 |

|            |             |             |             |
|------------|-------------|-------------|-------------|
| CBX4       | 0.775214011 | 0.040621808 | 0.034367436 |
| LYPD3      | 0.009931337 | 0.9999999   | 0.034407859 |
| CAPG       | 0.341822486 | 0.336003353 | 0.034453524 |
| SIK1       | 0.498464616 | 0.082411688 | 0.034600998 |
| UFSP1      | 0.815806783 | 0.018173363 | 0.034612921 |
| KLF6       | 0.055120144 | 0.000261787 | 0.034664379 |
| LMO7       | 0.001430339 | 2.1787E-07  | 0.034689948 |
| HACD4      | 0.050706661 | 0.415229678 | 0.03482098  |
| HR         | 0.9999999   | 0.012559443 | 0.035005584 |
| ACTL6A     | 0.040036733 | 0.987971817 | 0.03501319  |
| APH1B      | 0.314918076 | 0.53701047  | 0.035021906 |
| DDX10      | 0.019639124 | 0.813745737 | 0.035063024 |
| TRIM15     | 0.095947642 | 7.85128E-05 | 0.035080279 |
| DDX3Y      | 0.012307512 | 0.774745726 | 0.035118335 |
| AL691432.2 | 0.401299575 | 0.652014622 | 0.035190903 |
| B2M        | 0.024557489 | 1.53241E-05 | 0.035327352 |
| NEK9       | 0.003158525 | 0.447660191 | 0.035337283 |
| ARHGAP17   | 0.75970682  | 0.010618233 | 0.035381513 |
| CCR1       | 0.932263868 | 0.415229678 | 0.035430026 |
| ANP32E     | 0.352091038 | 0.08865566  | 0.03543724  |
| ILVBL      | 0.825653343 | 0.141063893 | 0.035448887 |
| STEAP1     | 0.00960032  | 0.875826039 | 0.03545525  |
| OSR2       | 0.851232608 | 0.03860277  | 0.035466362 |
| FAM114A1   | 0.581606115 | 0.011465462 | 0.03548111  |
| SAXO2      | 0.9999999   | 0.012813944 | 0.03553182  |
| F2RL1      | 0.066805415 | 1.89845E-05 | 0.03573126  |
| MAFF       | 0.002214774 | 4.12589E-07 | 0.035752349 |
| BATF       | 0.323793359 | 0.327981955 | 0.035817347 |
| GIPC1      | 0.856349652 | 0.033243166 | 0.035866464 |
| PLCB4      | 0.9999999   | 0.013056376 | 0.03603065  |
| SMIM5      | 0.996185378 | 0.07165419  | 0.036036523 |
| MKRN1      | 0.319894204 | 0.001593361 | 0.036180732 |
| MIR29B2CHG | 0.011015288 | 0.839062218 | 0.036210741 |
| STRN4      | 0.693772915 | 0.245947423 | 0.036248907 |
| ZBTB17     | 0.812680534 | 0.035531175 | 0.036274167 |
| SSBP2      | 0.429558269 | 0.343954338 | 0.036286597 |
| RNF20      | 0.000111391 | 0.109730028 | 0.03632084  |
| KHNYN      | 0.293955895 | 0.00144127  | 0.036323618 |
| RPUSD4     | 0.902613724 | 0.048597411 | 0.03636682  |
| INPP4B     | 0.00513703  | 0.457078245 | 0.036387858 |
| PGS1       | 0.008906838 | 0.912536027 | 0.03644184  |
| APIP       | 0.254321125 | 0.878477533 | 0.036470967 |
| ZNF324     | 0.014565311 | 0.918253569 | 0.036480219 |

|            |             |             |             |
|------------|-------------|-------------|-------------|
| RTN4R      | 0.034354164 | 2.99352E-05 | 0.036533887 |
| LDHB       | 0.230414489 | 0.13001061  | 0.036609132 |
| C1orf21    | 0.360040432 | 0.21413535  | 0.036637438 |
| ADGRF1     | 0.067826727 | 6.98594E-05 | 0.036702965 |
| DSTN       | 0.151500591 | 0.000122968 | 0.036715638 |
| TRAPPC5    | 0.010905091 | 0.9999999   | 0.036758592 |
| BBS12      | 0.401299575 | 0.068893887 | 0.036917892 |
| MDN1       | 0.355909741 | 0.44471921  | 0.036963544 |
| AC090912.2 | 0.234641166 | 0.112946869 | 0.037011437 |
| SEZ6L2     | 0.829694087 | 0.048649388 | 0.037095528 |
| NPM1       | 0.141350113 | 0.570488077 | 0.037104966 |
| AKR1C3     | 0.467679326 | 0.384970598 | 0.03713386  |
| ANXA6      | 0.031338836 | 0.688149108 | 0.037135744 |
| CAMK2D     | 0.035009605 | 1.47202E-05 | 0.037217076 |
| HLA-F      | 0.067181203 | 0.000228378 | 0.037314625 |
| WDTC1      | 0.875408733 | 0.026052283 | 0.037387577 |
| SPG11      | 0.208987747 | 0.902048854 | 0.03739568  |
| CFDP1      | 0.421762444 | 0.007430136 | 0.037413031 |
| SOWAHC     | 0.231922382 | 0.001074727 | 0.037589576 |
| TMEM168    | 0.338123817 | 0.002816614 | 0.037606022 |
| SRGN       | 0.400013876 | 0.000348146 | 0.037637746 |
| MRPL41     | 0.015310095 | 0.841625249 | 0.037909934 |
| UBE2O      | 0.001333774 | 0.194483016 | 0.037929772 |
| AC025263.1 | 0.122384236 | 0.474594373 | 0.037942928 |
| TRIM21     | 0.030579798 | 4.94421E-05 | 0.038084649 |
| TIA1       | 0.001490418 | 0.281255391 | 0.038092864 |
| DUSP5      | 0.382363331 | 0.002307034 | 0.038174912 |
| HDAC8      | 0.001374057 | 0.249367603 | 0.038209796 |
| SUFU       | 0.278077597 | 0.047777771 | 0.038226375 |
| CD2        | 0.193746587 | 0.146906172 | 0.038404251 |
| ACE2       | 0.431659194 | 0.480768719 | 0.038446051 |
| SBNO1      | 0.314913459 | 0.001926345 | 0.038464812 |
| POLR3B     | 0.091157153 | 0.324890394 | 0.038542041 |
| BLVRA      | 0.530992168 | 0.19297696  | 0.038570739 |
| SELENOW    | 0.610368735 | 0.02379015  | 0.038801176 |
| DPM2       | 0.000257976 | 0.154631058 | 0.038941982 |
| NOMO1      | 0.150708802 | 0.344827903 | 0.038997486 |
| ATP2B4     | 0.000103227 | 0.019743459 | 0.039202341 |
| RNF186     | 0.65761219  | 0.020972238 | 0.039443904 |
| ZHX1       | 0.603888324 | 0.223467436 | 0.039587332 |
| SHROOM3    | 0.018749583 | 1.21154E-05 | 0.039639494 |
| ZRANB2     | 0.002483776 | 0.254692831 | 0.039655606 |
| CFAP298    | 0.011510338 | 0.423490576 | 0.039791077 |

|              |             |             |             |
|--------------|-------------|-------------|-------------|
| THOC3        | 0.634767574 | 0.125658907 | 0.039841023 |
| KLHDC7B      | 0.012285226 | 0.9999999   | 0.039989061 |
| RNASEH2C     | 0.247870811 | 0.484387181 | 0.040030872 |
| CFH          | 0.044098134 | 0.68057781  | 0.040042251 |
| CLPB         | 0.000608352 | 0.118229097 | 0.040073213 |
| MXRA5        | 0.088898087 | 0.366659076 | 0.04010026  |
| BMPR1A       | 0.388678066 | 0.003176135 | 0.040126342 |
| SMIM22       | 0.027258205 | 5.69623E-05 | 0.040164706 |
| SLC16A7      | 0.97956708  | 0.048313766 | 0.040208895 |
| EXOC6B       | 0.674661003 | 0.013199106 | 0.040261699 |
| AREG         | 0.636829785 | 0.013752814 | 0.040291761 |
| HECTD1       | 0.555924133 | 0.367055686 | 0.040403101 |
| FGFR1OP2     | 0.003702457 | 0.345169577 | 0.040413077 |
| NIT1         | 6.43661E-05 | 0.079768899 | 0.040625764 |
| CNIH1        | 0.317719568 | 0.514178847 | 0.040711331 |
| NCAPD3       | 0.575384155 | 0.190873154 | 0.040773245 |
| AVPI1        | 0.54716063  | 0.003410409 | 0.040780338 |
| GKN1         | 0.423969979 | 0.004490237 | 0.040831775 |
| USP2         | 0.401299575 | 0.124966747 | 0.040851716 |
| TRAF3IP2-AS1 | 0.235068737 | 0.144239917 | 0.040878035 |
| PSAPL1       | 0.342940171 | 0.55806834  | 0.041148125 |
| CAPRIN1      | 0.000249739 | 0.148509403 | 0.041226592 |
| ZNF322       | 0.855296653 | 0.055146636 | 0.041288475 |
| AC016831.7   | 0.617779939 | 0.119181623 | 0.041348939 |
| TTC8         | 0.291951531 | 0.881715262 | 0.041349818 |
| AP000866.2   | 0.9999999   | 0.015734792 | 0.041397608 |
| CDHR5        | 0.952234634 | 0.025555321 | 0.041411325 |
| ITGB5        | 0.973054966 | 0.020962854 | 0.041617448 |
| COQ5         | 0.671202392 | 0.209984295 | 0.041697792 |
| TRAC         | 0.029457734 | 0.430840167 | 0.041738361 |
| LIPH         | 0.003247786 | 3.33396E-07 | 0.04176673  |
| PSD3         | 0.707314563 | 0.081216872 | 0.041797082 |
| TRIM66       | 0.013091396 | 0.9999999   | 0.041827309 |
| CAMK2N1      | 0.2510727   | 0.000431906 | 0.041885544 |
| PLAC8        | 0.751907368 | 0.01108122  | 0.041923273 |
| MMP9         | 0.863760272 | 0.05520448  | 0.041954541 |
| PRRC2B       | 0.048526232 | 0.900661498 | 0.04203945  |
| TUBA4A       | 0.051176667 | 0.912958175 | 0.042059302 |
| HDAC7        | 0.020388245 | 0.836905129 | 0.042097264 |
| ACOX1        | 0.72667967  | 0.072534945 | 0.042138329 |
| LINC00926    | 0.708852635 | 0.032675931 | 0.042178695 |
| LARP4B       | 0.239581414 | 0.000351118 | 0.042217375 |
| ATPAF1       | 0.984136988 | 0.02871716  | 0.042436307 |

|            |             |             |             |
|------------|-------------|-------------|-------------|
| NFKBIE     | 0.937297407 | 0.069107131 | 0.042462344 |
| MED22      | 0.16474172  | 0.157510387 | 0.042579391 |
| CNOT8      | 0.104360178 | 0.575311583 | 0.042684985 |
| MFSD10     | 0.067517982 | 0.862390218 | 0.042816037 |
| CAMSAP2    | 0.001341405 | 0.29667372  | 0.042897855 |
| ATP8B1     | 0.918208095 | 0.024801496 | 0.042924545 |
| CLDN4      | 0.01009016  | 2.17479E-05 | 0.042952381 |
| AL441992.1 | 0.183338462 | 0.813041159 | 0.042969481 |
| CDC42EP5   | 0.062993246 | 6.02874E-05 | 0.043010362 |
| NRP1       | 0.016090602 | 0.790332127 | 0.043026451 |
| SMG8       | 0.23259715  | 0.153309525 | 0.04304173  |
| SMAD5      | 0.333573332 | 0.449547978 | 0.043088944 |
| MFNG       | 0.43758366  | 0.20265705  | 0.043313706 |
| SFR1       | 0.7474175   | 0.009444043 | 0.043373675 |
| SPATA2     | 0.240142374 | 0.000785042 | 0.043438601 |
| BUB1       | 0.373792955 | 0.149495805 | 0.043447898 |
| SPATA6     | 0.11511207  | 0.791936007 | 0.0434639   |
| PLS1       | 0.106979415 | 0.000175459 | 0.043643415 |
| AC020656.1 | 0.576554475 | 0.187804922 | 0.043649216 |
| DCBLD2     | 0.029484905 | 0.838692321 | 0.043736266 |
| NCOA7      | 0.082936652 | 0.000173406 | 0.04376857  |
| PRSS8      | 0.031030798 | 6.76172E-05 | 0.043791919 |
| SIAE       | 0.594312803 | 0.006547674 | 0.043864908 |
| DEGS1      | 9.72805E-05 | 0.025905745 | 0.043895774 |
| PARP8      | 0.36514114  | 0.003952197 | 0.043932978 |
| TBC1D22A   | 0.437320138 | 0.260655453 | 0.043982999 |
| PIGA       | 0.771431787 | 0.016467398 | 0.044008887 |
| LAMTOR2    | 0.000486668 | 0.060147543 | 0.044031323 |
| NFX1       | 0.398223509 | 0.37951549  | 0.044225035 |
| ASXL1      | 0.00555868  | 0.463306389 | 0.044461018 |
| FGF2       | 0.005487637 | 0.225200933 | 0.044505212 |
| CDX2       | 0.071078194 | 0.000336876 | 0.044610006 |
| PDS5A      | 0.493265581 | 0.28311099  | 0.044641824 |
| CDC20      | 0.109097254 | 0.247605833 | 0.044655419 |
| DPYD       | 0.000165    | 0.02154224  | 0.044819946 |
| DAG1       | 0.063702775 | 0.00028046  | 0.04484547  |
| WDFY2      | 0.010158735 | 0.648512255 | 0.044859661 |
| LDHA       | 0.027826759 | 0.974449188 | 0.044967207 |
| TBK1       | 0.561347378 | 0.01300772  | 0.045042971 |
| ABHD17C    | 0.055767715 | 1.73264E-05 | 0.045094412 |
| ACAP2      | 0.78998957  | 0.402109732 | 0.045106302 |
| DARS       | 0.00046603  | 0.091143139 | 0.045229518 |
| ZC3H7B     | 0.123360442 | 0.981666728 | 0.04537576  |

|            |             |             |             |
|------------|-------------|-------------|-------------|
| PEX5       | 0.9999999   | 0.017800489 | 0.045380045 |
| HMG20B     | 0.221880477 | 0.002657295 | 0.04546333  |
| CD53       | 0.007842222 | 0.660431434 | 0.045505032 |
| ITGB7      | 0.004685066 | 0.340090347 | 0.045555873 |
| TTBK2      | 0.005947217 | 0.601338908 | 0.045628572 |
| LTBP1      | 0.868662963 | 0.03872973  | 0.045687168 |
| ESRP1      | 0.67731424  | 0.075734894 | 0.045768875 |
| CYTIP      | 0.769996278 | 0.017326447 | 0.045813453 |
| SNAI3-AS1  | 0.014898865 | 0.9999999   | 0.045834733 |
| NHS        | 0.965110682 | 0.016787117 | 0.045842573 |
| EHD2       | 0.348402912 | 0.225753128 | 0.045988929 |
| SNU13      | 0.018452587 | 0.528544877 | 0.045997843 |
| RAB27B     | 0.761552889 | 0.022943829 | 0.046082248 |
| OPLAH      | 0.419998865 | 0.216517857 | 0.0462172   |
| CLDN3      | 0.314973014 | 0.001206086 | 0.046246907 |
| SIRT1      | 0.554854776 | 0.132049675 | 0.046283756 |
| ARL6IP4    | 0.055668813 | 0.873253811 | 0.046387687 |
| KAZALD1    | 0.838825558 | 0.024585953 | 0.046450944 |
| ABI1       | 0.246126786 | 0.003180593 | 0.046483896 |
| ACAT1      | 0.12804618  | 0.508831865 | 0.046679685 |
| APC        | 0.243735454 | 0.002127555 | 0.046807575 |
| KIAA1522   | 0.620973474 | 0.014891843 | 0.0468503   |
| SORBS3     | 0.835714837 | 0.022322543 | 0.047217604 |
| TCN1       | 0.17646931  | 0.002082919 | 0.047286299 |
| HOXA3      | 0.820366654 | 0.191496499 | 0.047416218 |
| TMOD3      | 0.479724877 | 0.010608425 | 0.047626977 |
| RRAS2      | 0.49261771  | 0.016113095 | 0.047744119 |
| AC073332.1 | 0.237674218 | 0.213179665 | 0.047783305 |
| LIMA1      | 0.331538811 | 0.005020337 | 0.047980177 |
| GRK3       | 0.207327551 | 0.329245825 | 0.048043931 |
| POLE2      | 0.249507312 | 0.415229678 | 0.048316946 |
| KLK6       | 0.032577687 | 0.464444849 | 0.048326955 |
| HOXB3      | 0.087640542 | 0.000266414 | 0.04836118  |
| SEMA6B     | 0.017354415 | 0.976378487 | 0.048487043 |
| AC105446.1 | 0.016140676 | 0.9999999   | 0.048506916 |
| BRD3       | 0.560085851 | 0.105077543 | 0.048568042 |
| AEN        | 0.947640497 | 0.035673558 | 0.048651556 |
| TNFSF9     | 0.936470552 | 0.067714654 | 0.048707125 |
| KLHL15     | 0.037342443 | 0.415229678 | 0.048736596 |
| RPL4       | 0.142503685 | 0.578732959 | 0.048796256 |
| ZNF341     | 0.510569531 | 0.415229678 | 0.048804235 |
| FRRS1      | 0.016292399 | 0.9999999   | 0.048829277 |
| CYP1B1     | 0.841461009 | 0.062357423 | 0.048965789 |

|            |             |             |             |
|------------|-------------|-------------|-------------|
| IQSEC1     | 0.354011043 | 0.525196867 | 0.049080779 |
| SIVA1      | 0.332744952 | 0.501289202 | 0.049086176 |
| DDX17      | 0.005008511 | 0.289975134 | 0.049088901 |
| GARS       | 0.022329751 | 0.848691154 | 0.04912752  |
| CHD7       | 0.498136944 | 0.261453488 | 0.04914666  |
| ARL5B      | 0.857075123 | 0.05270274  | 0.049154521 |
| SNAPIN     | 0.998832366 | 0.071139813 | 0.04916719  |
| RASAL3     | 0.284642828 | 0.3080137   | 0.049259049 |
| RGMB       | 0.401299575 | 0.054487938 | 0.049304358 |
| SPA17      | 0.06994097  | 0.785077932 | 0.049514976 |
| KCNAB2     | 0.003904641 | 0.296842032 | 0.049618706 |
| IL7        | 0.227792543 | 0.00298842  | 0.049630056 |
| FKBP11     | 0.187968823 | 0.708953441 | 0.04986085  |
| SGO2       | 0.468123883 | 0.316489669 | 0.049906336 |
| PPP1R26    | 0.32600318  | 0.004952714 | 0.050257703 |
| VSIG10     | 0.055487102 | 0.000295629 | 0.05036984  |
| CXCL17     | 0.047491532 | 0.391541448 | 0.050472416 |
| TRAPPC11   | 0.705600972 | 0.014036814 | 0.050588636 |
| AC026401.3 | 0.017144369 | 0.9999999   | 0.050623751 |
| TMEM219    | 0.311779734 | 0.006699307 | 0.050804814 |
| SAYSD1     | 0.507234295 | 0.04288307  | 0.05087855  |
| HLA-DQB1   | 0.260613903 | 0.005877895 | 0.050900867 |
| RAB2A      | 0.241992314 | 0.00155599  | 0.050980156 |
| RPL10      | 0.018460827 | 0.812602429 | 0.051123536 |
| YTHDF1     | 0.394156261 | 0.00816543  | 0.051383334 |
| EXOC1      | 0.792134821 | 0.033132872 | 0.051517074 |
| PIP4K2C    | 0.128581636 | 0.000597906 | 0.051575846 |
| MAGI3      | 0.027712742 | 0.000225315 | 0.051717279 |
| EEF1A2     | 0.091571067 | 0.000216306 | 0.05172631  |
| AC103591.3 | 0.003201348 | 0.393286766 | 0.05175088  |
| VILL       | 0.300001023 | 0.007239019 | 0.051903201 |
| RPS4Y1     | 0.01591761  | 0.706900767 | 0.051978897 |
| ACTN4      | 0.009286553 | 3.00648E-05 | 0.052017718 |
| PICALM     | 0.032489452 | 0.000145018 | 0.052337415 |
| CEP57      | 0.022471144 | 0.751588202 | 0.052351766 |
| CAND1      | 0.500048654 | 0.012942308 | 0.052663247 |
| MED20      | 0.835476985 | 0.02000061  | 0.052865072 |
| AZGP1      | 0.065404136 | 0.000126203 | 0.052884313 |
| BDKRB2     | 0.297121152 | 0.003570952 | 0.052966073 |
| MRPS15     | 0.007185195 | 0.451810844 | 0.053139513 |
| TAF13      | 0.543868422 | 0.009142389 | 0.053163061 |
| APH1A      | 0.698210352 | 0.046098368 | 0.053252329 |
| CCDC122    | 0.043848425 | 0.415229678 | 0.053359177 |



|            |             |             |             |
|------------|-------------|-------------|-------------|
| EPN1       | 0.015852368 | 7.26481E-06 | 0.053454683 |
| SPATA7     | 0.768020305 | 0.042151387 | 0.053519259 |
| PSIP1      | 0.010762437 | 0.600126791 | 0.053569716 |
| LITAF      | 0.069821464 | 0.000131126 | 0.053647244 |
| GPR35      | 0.858300311 | 0.046215364 | 0.05385459  |
| ECHDC3     | 0.018727399 | 0.9999999   | 0.053891821 |
| FEZF1-AS1  | 0.489473045 | 0.008357829 | 0.053894313 |
| RNF135     | 0.026132161 | 0.732984129 | 0.053975478 |
| LINC01003  | 0.368888133 | 0.005519161 | 0.054180565 |
| MAN2C1     | 0.760240315 | 0.01534632  | 0.054284933 |
| RAB17      | 0.967976981 | 0.033471563 | 0.054328152 |
| STX1A      | 0.000265789 | 0.207105805 | 0.054411754 |
| KIF3B      | 0.27448418  | 0.001631419 | 0.054521426 |
| MYO1B      | 0.57103882  | 0.014001396 | 0.054840421 |
| FAM3D      | 0.00939179  | 1.19369E-05 | 0.055080106 |
| SLF1       | 0.039710722 | 0.66764579  | 0.055192641 |
| AP3M1      | 0.013327091 | 0.663753268 | 0.055223483 |
| CHCHD2     | 0.008533688 | 0.38704801  | 0.055322047 |
| UBL5       | 0.001823107 | 0.12911217  | 0.055534358 |
| TTC22      | 0.042793017 | 0.000159202 | 0.055620515 |
| NEAT1      | 0.013400398 | 0.488080774 | 0.05587107  |
| CLIC5      | 0.034840419 | 7.96546E-06 | 0.056003898 |
| NCEH1      | 0.089671054 | 0.000184418 | 0.056009743 |
| SPTSSA     | 0.00525759  | 0.36436035  | 0.056090405 |
| SH3BGR13   | 0.008521623 | 0.402161723 | 0.056128799 |
| TRAF4      | 0.057496826 | 0.000362998 | 0.056377238 |
| APP        | 0.003873718 | 8.87911E-07 | 0.056398575 |
| RARA       | 0.231386643 | 0.001783189 | 0.056413615 |
| DSG3       | 0.028519024 | 0.247235212 | 0.056577918 |
| HIST2H2BE  | 0.049450978 | 0.000163419 | 0.056636422 |
| AC005550.2 | 0.401299575 | 0.047671317 | 0.056922898 |
| GPR153     | 0.998897365 | 0.027830184 | 0.057040468 |
| TMEM54     | 0.235937821 | 0.001449496 | 0.057101261 |
| GMEB2      | 0.50530042  | 0.005843397 | 0.057353813 |
| KIF5B      | 0.278638902 | 0.004575659 | 0.05743193  |
| PSMD5      | 0.423408094 | 0.005606303 | 0.057634362 |
| HDAC10     | 0.402099489 | 0.006201872 | 0.057723409 |
| MYH10      | 0.976692737 | 0.026332202 | 0.057754912 |
| NRROS      | 0.020681172 | 0.9999999   | 0.057818409 |
| PELI1      | 0.658999292 | 0.020308464 | 0.058051262 |
| LGALS1     | 0.139689194 | 0.006869785 | 0.058380905 |
| GTSE1      | 0.022774929 | 0.833750565 | 0.058382482 |
| C1orf198   | 0.764931684 | 0.019190192 | 0.058390824 |

|           |             |             |             |
|-----------|-------------|-------------|-------------|
| MORN3     | 0.020975197 | 0.9999999   | 0.058399958 |
| TMEM204   | 0.030253401 | 0.415229678 | 0.058409167 |
| HEXB      | 0.125583531 | 0.001357623 | 0.058706352 |
| YWHAZ     | 0.045939953 | 6.55942E-05 | 0.058885318 |
| CCNK      | 0.418792298 | 0.012493699 | 0.059028377 |
| SLC39A14  | 0.773737519 | 0.017918808 | 0.059066587 |
| NAA60     | 0.354648644 | 0.01090635  | 0.059410471 |
| SP2       | 0.021065508 | 0.000582699 | 0.059450633 |
| GBP3      | 0.202183227 | 0.001724857 | 0.059556663 |
| MYPOP     | 0.020731031 | 0.968821775 | 0.059679253 |
| NIF3L1    | 0.744456686 | 0.027355183 | 0.059759418 |
| HAVCR2    | 0.021870883 | 0.9999999   | 0.06015741  |
| MID1IP1   | 0.008691961 | 0.442334142 | 0.060172856 |
| CCDC124   | 0.021541684 | 0.683420086 | 0.060191863 |
| KANTR     | 0.021892169 | 0.9999999   | 0.060198923 |
| WLS       | 0.413159647 | 0.006154718 | 0.060390839 |
| PPP1R7    | 0.338645078 | 0.006609708 | 0.060434407 |
| RHNO1     | 0.453754792 | 0.009215822 | 0.060440491 |
| NUDT7     | 0.012181554 | 0.550191433 | 0.06064807  |
| LINC01215 | 0.022125595 | 0.9999999   | 0.060653419 |
| GATA3     | 0.024229532 | 0.9063136   | 0.060779074 |
| IFT140    | 0.926871385 | 0.045562724 | 0.061455103 |
| WDR48     | 0.780516412 | 0.022473396 | 0.061462814 |
| FAM98A    | 0.001860685 | 0.188720314 | 0.06149218  |
| TNFRSF10B | 0.019764927 | 0.684862116 | 0.061612507 |
| ITGAL     | 0.031689799 | 0.878320377 | 0.061632895 |
| BOD1L1    | 0.03523581  | 4.44363E-05 | 0.061792616 |
| DNAJC30   | 0.002173467 | 0.47020332  | 0.06192769  |
| IFNAR1    | 0.06262533  | 2.81705E-05 | 0.061982653 |
| IPO8      | 0.920190592 | 0.032275656 | 0.062044173 |
| NPTN      | 0.547822493 | 0.009127533 | 0.062062578 |
| WAC       | 0.034073132 | 8.6459E-05  | 0.062143956 |
| MTMR2     | 0.360927565 | 0.003559644 | 0.062241003 |
| TAF1D     | 0.010821717 | 0.593930834 | 0.062363599 |
| SULT1A1   | 0.381377663 | 0.005816152 | 0.06243327  |
| QTRT2     | 0.032241272 | 0.676817501 | 0.062604873 |
| C2orf68   | 0.710376194 | 0.01542356  | 0.062643185 |
| CHAC1     | 0.511922524 | 0.013444539 | 0.062691184 |
| RHOD      | 0.132018636 | 0.000706496 | 0.062787478 |
| BIRC3     | 0.125139059 | 0.000206551 | 0.063149234 |
| CARD8-AS1 | 0.039932014 | 0.415229678 | 0.063197011 |
| VPS13D    | 0.010958654 | 0.68218018  | 0.063306653 |
| WASF2     | 0.007111075 | 1.22182E-05 | 0.063600951 |

|          |             |             |             |
|----------|-------------|-------------|-------------|
| RPRD1B   | 0.58280574  | 0.01912667  | 0.063609167 |
| CD24     | 0.637202884 | 0.029343127 | 0.06381049  |
| WDFY3    | 0.653212874 | 0.013127998 | 0.063900223 |
| N4BP2L1  | 0.46361537  | 0.006471729 | 0.064148386 |
| CCDC69   | 0.004113893 | 0.203454471 | 0.064153879 |
| PIGR     | 0.047555745 | 0.000201072 | 0.064270885 |
| LIMD2    | 0.043623623 | 0.702740329 | 0.064313493 |
| RPL12    | 0.043353354 | 0.926520159 | 0.064353248 |
| ORC2     | 0.015092622 | 0.72310482  | 0.064545088 |
| RNASET2  | 0.03259887  | 0.622425282 | 0.064572587 |
| ZNF490   | 0.024195321 | 0.9999999   | 0.064625751 |
| WWC2     | 0.831417096 | 0.032078662 | 0.064680722 |
| ITGAV    | 0.601657125 | 0.016504222 | 0.064850353 |
| TOR1B    | 0.001412785 | 0.041254697 | 0.064994917 |
| YWHAH    | 0.121612052 | 0.000843442 | 0.065144211 |
| ZDHHC2   | 0.03345104  | 0.949983435 | 0.065192925 |
| SCAF1    | 0.737637555 | 0.02437357  | 0.065235183 |
| CCDC71   | 0.97568242  | 0.026803462 | 0.065285244 |
| B4GALT5  | 0.052268372 | 0.000185827 | 0.065378829 |
| RAB35    | 0.782206912 | 0.037444714 | 0.065929959 |
| TRIM31   | 0.001765437 | 4.65523E-08 | 0.065937089 |
| SPINT1   | 0.002694593 | 3.8805E-06  | 0.066252163 |
| MAT2B    | 0.068603809 | 0.000262493 | 0.066555173 |
| B3GNT3   | 0.07566622  | 0.000645448 | 0.066651721 |
| LMTK2    | 0.004867587 | 2.36299E-05 | 0.066679305 |
| GYS1     | 0.016526436 | 0.716143773 | 0.066715337 |
| CYB5R4   | 0.286101252 | 0.003206113 | 0.06687639  |
| TP53INP2 | 0.183149688 | 0.001069577 | 0.066892912 |
| ZDHHC13  | 0.017444274 | 0.000109102 | 0.067122096 |
| SSBP3    | 0.144666109 | 0.001106764 | 0.067382323 |
| FUBP3    | 0.298403708 | 0.002521488 | 0.067823923 |
| SP4      | 0.003540004 | 0.225200933 | 0.06784723  |
| CCL18    | 0.040876484 | 0.744861787 | 0.067970211 |
| CITED2   | 0.764180816 | 0.022815357 | 0.068041674 |
| CPOX     | 0.029476656 | 0.860977355 | 0.068254173 |
| ARHGAP6  | 0.056243084 | 0.000336545 | 0.068263427 |
| USP20    | 0.004339118 | 0.093406877 | 0.068302411 |
| CCDC18   | 0.017043093 | 0.74807678  | 0.068303966 |
| CREBZF   | 0.001393332 | 0.075288605 | 0.068549478 |
| ICMT     | 0.034920928 | 5.43523E-05 | 0.06859481  |
| RRNAD1   | 0.004723053 | 0.468829996 | 0.068796033 |
| CYTH4    | 0.026427947 | 0.9999999   | 0.068804037 |
| MAN1A2   | 0.037092095 | 0.860956144 | 0.0690693   |

|            |             |             |             |
|------------|-------------|-------------|-------------|
| SYT13      | 0.257758391 | 0.005036909 | 0.069155325 |
| GALT       | 0.021428201 | 0.701152474 | 0.069208077 |
| ESD        | 0.338226202 | 0.042869092 | 0.069346978 |
| TACC1      | 0.448619251 | 0.007687361 | 0.069377369 |
| BACE2      | 0.408228076 | 0.016665437 | 0.069414795 |
| FAIM       | 0.037251433 | 0.976378487 | 0.069443186 |
| FAM222B    | 0.138570324 | 0.000432287 | 0.069461728 |
| LAMA5      | 0.003758387 | 0.182114137 | 0.069525876 |
| MIR3945HG  | 0.9999999   | 0.031753013 | 0.06988082  |
| AL357033.4 | 0.9999999   | 0.031847428 | 0.070036018 |
| TRIM14     | 0.04922773  | 0.75578487  | 0.070064141 |
| GPR68      | 0.019892317 | 0.671446916 | 0.070073409 |
| MYRF       | 0.012967494 | 5.04333E-06 | 0.07007499  |
| MCF2L-AS1  | 0.9999999   | 0.031981026 | 0.070255432 |
| ARRDC3     | 0.002748585 | 0.17657955  | 0.070303437 |
| PRKD2      | 0.286120615 | 0.005667579 | 0.07031397  |
| PROM1      | 0.355055247 | 0.008720917 | 0.070347302 |
| HSD17B11   | 0.014911358 | 3.80913E-05 | 0.070398651 |
| RAB1A      | 0.022912985 | 2.59581E-05 | 0.070401309 |
| PAN3       | 0.00459453  | 0.324422449 | 0.07044493  |
| MIB1       | 0.703670461 | 0.021346512 | 0.070502014 |
| SDR16C5    | 0.098959986 | 0.000220748 | 0.07059844  |
| TMEM82     | 0.9999999   | 0.032261002 | 0.070714519 |
| LRFN4      | 0.031190011 | 0.899796097 | 0.070752214 |
| TBRG4      | 0.969133627 | 0.039210644 | 0.070825797 |
| AC108134.3 | 0.9999999   | 0.032419403 | 0.070973819 |
| GPRC5A     | 0.000889498 | 9.49468E-09 | 0.071141867 |
| DUOXA2     | 0.016979525 | 1.00491E-05 | 0.071204385 |
| ARG2       | 0.007667098 | 0.225200933 | 0.071247203 |
| RASA3      | 0.028059843 | 0.589272319 | 0.071487862 |
| REXO1      | 0.008278461 | 0.506561732 | 0.071545042 |
| STXBP3     | 0.576455046 | 0.014611696 | 0.071664442 |
| SGPP2      | 0.057541419 | 0.000130011 | 0.071672105 |
| HEATR1     | 0.003516351 | 0.182290383 | 0.072018924 |
| C2orf72    | 0.9999999   | 0.033254627 | 0.072335968 |
| API5       | 0.007481797 | 0.458026584 | 0.072433768 |
| GPATCH2    | 0.006638571 | 0.414083895 | 0.072458307 |
| ZNF620     | 0.236072962 | 0.002264888 | 0.072487223 |
| EAF1       | 0.656212762 | 0.025453122 | 0.073046553 |
| B3GNT9     | 0.9999999   | 0.033776945 | 0.073183525 |
| HNF4G      | 0.121935869 | 0.00176159  | 0.073314722 |
| DMWD       | 0.096274264 | 0.000648887 | 0.07336897  |
| AC022966.1 | 0.9999999   | 0.033934868 | 0.073439148 |

|            |             |             |             |
|------------|-------------|-------------|-------------|
| UBOX5      | 0.9999999   | 0.033945975 | 0.073457115 |
| ZNF737     | 0.9999999   | 0.034014875 | 0.073568541 |
| KCTD11     | 0.758903408 | 0.03619148  | 0.073575698 |
| DENR       | 0.000484117 | 0.099531805 | 0.073820427 |
| RPS6KA2    | 0.000388156 | 0.056347604 | 0.0738287   |
| CTSS       | 0.122294463 | 0.00129596  | 0.074238903 |
| ANKRD11    | 0.001938581 | 0.18327702  | 0.074466997 |
| CHMP7      | 0.212446991 | 0.002873563 | 0.07468147  |
| GGA3       | 0.190859384 | 0.002336046 | 0.074876808 |
| BICDL2     | 0.756703539 | 0.030959632 | 0.074902019 |
| UTP14C     | 0.559540383 | 0.015253433 | 0.074904797 |
| C17orf100  | 0.9999999   | 0.034881212 | 0.074964897 |
| CCT3       | 0.02469813  | 0.605489226 | 0.074985977 |
| MEAF6      | 0.619975969 | 0.014503228 | 0.075105652 |
| CSRNP1     | 0.003541913 | 1.73986E-07 | 0.07514574  |
| COASY      | 0.009056381 | 0.401027143 | 0.07515227  |
| HEPH       | 0.9999999   | 0.03509165  | 0.075302787 |
| MTSS1      | 0.006023415 | 0.349897859 | 0.07535273  |
| GALNT3     | 0.036730086 | 0.000126268 | 0.075362574 |
| CAPZA2     | 0.282053379 | 0.004544853 | 0.075450402 |
| FAM43A     | 0.592678998 | 0.016232552 | 0.075450646 |
| CCNL1      | 0.020664506 | 1.44653E-05 | 0.075468785 |
| TFF1       | 0.489292713 | 0.010870208 | 0.07548259  |
| TSN        | 0.229825183 | 0.001526529 | 0.075501697 |
| RALB       | 0.536648395 | 0.014068764 | 0.075535792 |
| SERTAD3    | 0.600327229 | 0.019348098 | 0.07583477  |
| TUBD1      | 0.027212131 | 0.83953955  | 0.075850093 |
| AC087741.1 | 0.042444659 | 0.833750565 | 0.075870363 |
| TRA2A      | 0.017147332 | 0.510887474 | 0.075991248 |
| TM2D2      | 0.040811776 | 0.000335201 | 0.076283523 |
| ZFAS1      | 0.021660841 | 0.544480448 | 0.076368173 |
| BTBD3      | 0.092622751 | 0.001562142 | 0.076433056 |
| VNN3       | 0.633100548 | 0.018891617 | 0.076463866 |
| IL15RA     | 0.010182163 | 0.000318791 | 0.076556604 |
| C15orf53   | 0.042244822 | 0.415229678 | 0.076680339 |
| FRMD5      | 0.924004987 | 0.046747817 | 0.076754233 |
| BTBD1      | 0.283009535 | 0.009542949 | 0.076786733 |
| IGHV3-7    | 0.9999999   | 0.036348815 | 0.077311144 |
| EIF3I      | 0.035745615 | 0.741035019 | 0.077360099 |
| TMEM163    | 0.690339622 | 0.035424848 | 0.077594839 |
| HLA-DMA    | 0.308205189 | 0.004179211 | 0.077601246 |
| LINC01348  | 0.9999999   | 0.036630464 | 0.077758734 |
| C3         | 0.016289804 | 0.440071599 | 0.078109361 |

|            |             |             |             |
|------------|-------------|-------------|-------------|
| NME3       | 0.001236632 | 0.106507826 | 0.078128774 |
| IL21R      | 0.038348832 | 0.775682398 | 0.07826181  |
| ADCK1      | 0.9999999   | 0.037098252 | 0.078500276 |
| S1PR4      | 0.010191506 | 0.018217567 | 0.078610652 |
| TES        | 0.077933452 | 0.000515809 | 0.078668204 |
| FGD6       | 0.312273897 | 0.008827368 | 0.078915885 |
| LAMTOR5    | 0.501640203 | 0.018678524 | 0.078946965 |
| NBPF1      | 0.411721277 | 0.010680599 | 0.079016458 |
| MPST       | 0.266009161 | 0.008194338 | 0.079093791 |
| PPP2R5D    | 0.020608478 | 0.660682556 | 0.07926063  |
| TPGS2      | 0.044779366 | 0.814100611 | 0.079264827 |
| NCR3LG1    | 0.9999999   | 0.037609903 | 0.079308735 |
| DYNLT3     | 0.270599089 | 0.002809558 | 0.07935158  |
| PI4KA      | 0.000268992 | 0.08042589  | 0.079355941 |
| PLA2G15    | 0.306921325 | 0.009559034 | 0.079679335 |
| SPG7       | 0.028175703 | 0.800913969 | 0.080046085 |
| TMEM45B    | 0.118381121 | 0.001315418 | 0.080400599 |
| TPST2      | 0.009926695 | 0.031509812 | 0.080551519 |
| YEATS2     | 0.19154098  | 0.003478779 | 0.080603793 |
| KIAA1191   | 0.18792094  | 0.003169221 | 0.080780402 |
| PI3        | 0.002188242 | 0.001758163 | 0.0808803   |
| GPRC5B     | 0.100700041 | 0.003171163 | 0.081597683 |
| ARHGEF35   | 0.415628115 | 0.01095939  | 0.081769311 |
| EIF4EBP2   | 0.567419455 | 0.025194984 | 0.081819062 |
| SPINT2     | 0.084878356 | 0.00096874  | 0.081955697 |
| MTHFR      | 0.122913839 | 0.002224353 | 0.081971799 |
| LHFPL2     | 0.560278845 | 0.012087496 | 0.081979066 |
| TTC31      | 0.002338211 | 0.199221839 | 0.082122231 |
| VIM        | 0.220701391 | 0.026835247 | 0.082242518 |
| SCAF8      | 0.065475081 | 0.000269504 | 0.082542922 |
| LTBR       | 0.695066031 | 0.027296593 | 0.082617942 |
| LINC00672  | 0.04892312  | 0.82739457  | 0.082643444 |
| VAPA       | 0.009112373 | 0.275911737 | 0.082932298 |
| ZBTB7B     | 0.129806143 | 0.002783657 | 0.082986061 |
| ZNF45      | 0.018172515 | 0.727918745 | 0.083052934 |
| ZNF623     | 0.040166861 | 0.00083297  | 0.083193101 |
| NGLY1      | 0.007788273 | 0.299267491 | 0.083362212 |
| PEX11A     | 0.239003352 | 0.008010202 | 0.083661216 |
| GATA4      | 0.931688612 | 0.033783124 | 0.083663466 |
| RNF128     | 0.270406378 | 0.006032221 | 0.083961833 |
| IQGAP1     | 0.034032375 | 8.16728E-05 | 0.08398945  |
| AC112220.4 | 0.001743403 | 0.208427999 | 0.084065364 |
| RPS6KA5    | 0.547548964 | 0.027280778 | 0.084077193 |

|            |             |             |             |
|------------|-------------|-------------|-------------|
| C1orf226   | 0.836168078 | 0.035133421 | 0.084156992 |
| AC100810.1 | 0.035216412 | 0.781562932 | 0.084175369 |
| MAP4K3     | 0.330091612 | 0.007431183 | 0.084236936 |
| GGCX       | 0.029606142 | 0.751472142 | 0.08432674  |
| CD109      | 0.222313693 | 0.015354346 | 0.084429091 |
| SCN9A      | 0.032772305 | 0.940515124 | 0.084513616 |
| POF1B      | 0.077011832 | 8.6097E-05  | 0.084586398 |
| ABHD4      | 0.040694933 | 0.835271627 | 0.084694919 |
| MAGI2      | 0.9999999   | 0.041126191 | 0.084794497 |
| ST3GAL1    | 0.007741108 | 0.269421365 | 0.085154232 |
| RAD1       | 0.041311434 | 0.962766519 | 0.085365107 |
| KMT2E      | 0.172481984 | 0.004181001 | 0.085400265 |
| YARS       | 0.0089049   | 0.374363076 | 0.085430843 |
| ATP6V1E1   | 0.077146351 | 0.001031771 | 0.085460341 |
| SLC39A4    | 0.013881837 | 0.490541035 | 0.085472364 |
| LRCH3      | 0.002586652 | 0.215282962 | 0.085626471 |
| RWDD2B     | 0.015927847 | 0.636294099 | 0.085790767 |
| HSDL1      | 0.427201357 | 0.019352633 | 0.085829363 |
| ELAVL1     | 0.034566387 | 0.600393796 | 0.085964505 |
| REL        | 0.013271802 | 0.000230363 | 0.086146951 |
| BAG4       | 0.003346187 | 0.471789655 | 0.086196189 |
| FAM98C     | 0.032083892 | 0.822712605 | 0.086229745 |
| EFNB2      | 0.248842453 | 0.003602472 | 0.086253846 |
| CLDN1      | 0.018652056 | 0.000182854 | 0.086602235 |
| FKBP8      | 0.0284421   | 0.477662009 | 0.086717108 |
| POLD4      | 0.036475562 | 0.819724679 | 0.086844725 |
| RPS7       | 0.026634035 | 0.595445461 | 0.086934344 |
| UGT1A1     | 0.9999999   | 0.04285829  | 0.08745433  |
| RABGAP1L   | 0.148389366 | 0.002022401 | 0.087492683 |
| PLEKHF2    | 0.145346406 | 0.004236898 | 0.087525651 |
| ALPG       | 0.9999999   | 0.042984631 | 0.087647306 |
| PRSS3      | 0.292818182 | 0.00130213  | 0.087691594 |
| COBLL1     | 0.542308895 | 0.014882273 | 0.087816055 |
| FGD2       | 0.037252587 | 0.9999999   | 0.087822817 |
| ATP6AP1L   | 0.037426247 | 0.9999999   | 0.088114077 |
| LINC01559  | 0.132085656 | 0.001679248 | 0.08824772  |
| SSFA2      | 0.304587992 | 0.010588193 | 0.088317806 |
| PLP2       | 0.020406929 | 0.595483992 | 0.088480721 |
| WFS1       | 0.373633228 | 0.004165159 | 0.088562248 |
| BACH1      | 0.006283209 | 5.33292E-05 | 0.088801171 |
| H1FX       | 0.025788236 | 0.000720326 | 0.088898402 |
| AL138724.1 | 0.012236725 | 0.225200933 | 0.088927725 |
| AC007364.1 | 0.037925621 | 0.9999999   | 0.088949526 |

|            |             |             |             |
|------------|-------------|-------------|-------------|
| HOXB9      | 0.037992302 | 0.9999999   | 0.08906085  |
| CELF1      | 0.048853459 | 0.677441209 | 0.089084835 |
| PTDSS1     | 0.002480564 | 0.205967556 | 0.089114886 |
| AGER       | 0.038097259 | 0.9999999   | 0.089235965 |
| SGK1       | 0.001356937 | 0.149875554 | 0.089353804 |
| C4BPA      | 0.016689038 | 0.52323258  | 0.089369655 |
| SERPINB7   | 0.01805749  | 0.496354654 | 0.089775123 |
| AL591845.1 | 0.038506571 | 0.9999999   | 0.089917594 |
| NKTR       | 0.03922102  | 0.839241975 | 0.089925763 |
| ZYG11B     | 0.346546642 | 0.014381093 | 0.09018456  |
| NUDT6      | 0.038684164 | 0.9999999   | 0.090212711 |
| NECTIN2    | 0.007702719 | 2.43836E-05 | 0.090292251 |
| IMPAD1     | 0.002799982 | 0.184711141 | 0.090399053 |
| CD200R1    | 0.9999999   | 0.044988918 | 0.090690576 |
| TTLL10     | 0.038981691 | 0.9999999   | 0.090706283 |
| MLKL       | 0.378643595 | 0.009240251 | 0.090743576 |
| RHBDF1     | 0.317766525 | 0.004464401 | 0.090762739 |
| CLASP2     | 0.027568429 | 0.613554899 | 0.090795568 |
| F11R       | 0.010737226 | 1.44864E-05 | 0.091047058 |
| GTSF1      | 0.039194583 | 0.9999999   | 0.091058807 |
| RNF213     | 0.019001119 | 0.300968564 | 0.091098192 |
| COP1       | 0.044335532 | 0.808323879 | 0.091458867 |
| ETNK1      | 0.127685034 | 0.002396223 | 0.091501448 |
| AC002467.1 | 0.239003352 | 0.016107752 | 0.091575654 |
| BANK1      | 0.466770231 | 0.012788173 | 0.091672959 |
| CMPK1      | 0.13653994  | 0.001645726 | 0.091935669 |
| PIK3CB     | 0.016735805 | 0.617014746 | 0.092009454 |
| AL357060.1 | 0.039856447 | 0.9999999   | 0.092151386 |
| AP003068.2 | 0.626178611 | 0.020041086 | 0.092474832 |
| KLHL25     | 0.239003352 | 0.015003937 | 0.092577806 |
| KIF24      | 0.04017685  | 0.9999999   | 0.092678473 |
| TMEM243    | 0.008690407 | 0.22168199  | 0.092680789 |
| EIF3F      | 0.046458134 | 0.652400255 | 0.092985282 |
| CLTCL1     | 0.040377202 | 0.9999999   | 0.093007473 |
| CD99L2     | 0.040389904 | 0.9999999   | 0.093028316 |
| AC011676.2 | 0.040520029 | 0.9999999   | 0.093241732 |
| THOC2      | 0.001421771 | 0.06815864  | 0.093343625 |
| GTF2IRD1   | 0.906988839 | 0.04808432  | 0.093537812 |
| MS4A8      | 0.9999999   | 0.046909419 | 0.093575873 |
| CMTM7      | 0.048281555 | 0.80590789  | 0.093620783 |
| ZNF529-AS1 | 0.040903956 | 0.9999999   | 0.093870298 |
| ADAT3      | 0.041097208 | 0.9999999   | 0.094186068 |
| E4F1       | 0.30956315  | 0.023776182 | 0.094379442 |



|            |             |             |             |
|------------|-------------|-------------|-------------|
| LPCAT4     | 0.206981936 | 0.002620772 | 0.094469455 |
| APOBR      | 0.041270928 | 0.9999999   | 0.094469571 |
| ZNF627     | 0.021554786 | 0.67025996  | 0.094492421 |
| PLEKHS1    | 0.194203462 | 0.006216485 | 0.094531181 |
| ZNF182     | 0.041319583 | 0.9999999   | 0.094548913 |
| NAA20      | 0.003570084 | 0.171200689 | 0.094695075 |
| TRMT6      | 0.008605706 | 0.355646426 | 0.094793766 |
| ABCA5      | 0.029495256 | 0.637825175 | 0.095008072 |
| NR2F6      | 0.163847153 | 0.001700443 | 0.095054037 |
| CDR2L      | 0.787885645 | 0.039948454 | 0.095183974 |
| ZNF638     | 0.000763049 | 0.103831174 | 0.095243016 |
| MT-ND3     | 0.004223809 | 0.14131921  | 0.095376129 |
| FAM220A    | 0.745112122 | 0.022365833 | 0.095421984 |
| DCAF8      | 0.005801652 | 0.258079683 | 0.095467086 |
| TMC4       | 0.003486897 | 0.283015252 | 0.095520987 |
| UBE2D1     | 0.279581401 | 0.008808337 | 0.095652934 |
| HDAC5      | 0.258806641 | 0.001001904 | 0.09567454  |
| AC093525.4 | 0.042021086 | 0.9999999   | 0.095690003 |
| PNPLA2     | 0.050773298 | 7.29941E-05 | 0.095763939 |
| GTF3C2     | 0.007154749 | 0.000268743 | 0.096135624 |
| VTN        | 0.9999999   | 0.048671582 | 0.096198185 |
| AXL        | 0.042455628 | 0.9999999   | 0.096394184 |
| TGM2       | 0.002667329 | 0.216423121 | 0.09668896  |
| GSPT1      | 0.008212047 | 0.301055041 | 0.096874826 |
| VGLL4      | 0.001427962 | 2.83113E-06 | 0.097042558 |
| HDGFL2     | 0.203806007 | 0.004764006 | 0.0970855   |
| SLC25A37   | 0.013182032 | 0.312043116 | 0.097215167 |
| PRRG1      | 0.695392792 | 0.043527955 | 0.097290834 |
| SLC22A23   | 0.747714347 | 0.044133562 | 0.097549232 |
| NIFK-AS1   | 0.239003352 | 0.017679096 | 0.097676736 |
| AMOTL2     | 0.495339159 | 0.024864636 | 0.097721077 |
| RAB3IP     | 0.017091409 | 0.000288033 | 0.097818692 |
| CDKN1B     | 0.613851982 | 0.024350719 | 0.097841821 |
| SERGEF     | 0.021213221 | 0.640337558 | 0.098069024 |
| VAMP8      | 0.207282518 | 0.003349607 | 0.098072978 |
| MICAL2     | 0.207327435 | 0.005133468 | 0.098488227 |
| HECTD2     | 0.043791701 | 0.9999999   | 0.098546889 |
| CAVIN1     | 0.043859095 | 0.9999999   | 0.098654986 |
| ZNF503     | 0.190422185 | 0.008583827 | 0.098683026 |
| LMBRD2     | 0.014617928 | 0.636883324 | 0.098851461 |
| GPSM3      | 0.028028217 | 0.608193855 | 0.098912778 |
| ZFP14      | 0.005365454 | 0.306204085 | 0.098974273 |
| FBXW11     | 0.073923013 | 0.001417007 | 0.099240833 |

|             |             |             |             |
|-------------|-------------|-------------|-------------|
| AC234772.3  | 0.044296653 | 0.9999999   | 0.099355707 |
| PRSS22      | 0.007258674 | 0.273976937 | 0.09938395  |
| MITF        | 0.041672251 | 0.806865555 | 0.099510429 |
| PARP14      | 3.08015E-07 | 0.001813067 | 0.09952345  |
| KIAA0040    | 0.350185917 | 0.014826219 | 0.099875422 |
| NNT-AS1     | 0.359852074 | 0.007126694 | 0.099956377 |
| PRKD3       | 0.003995741 | 0.0177051   | 0.100033579 |
| TMEM106C    | 0.003152372 | 0.106277117 | 0.100049685 |
| TRANK1      | 0.342122415 | 0.02029155  | 0.100254649 |
| B3GALT5-AS1 | 0.095787987 | 0.00169483  | 0.100371771 |
| PDLIM7      | 0.006625187 | 0.360143733 | 0.100507234 |
| AC002401.4  | 0.045026076 | 0.9999999   | 0.100519575 |
| PIWIL4      | 0.827054533 | 0.0408961   | 0.10080025  |
| TMEM131L    | 0.032481684 | 0.695444399 | 0.100877036 |
| TBC1D10A    | 0.004158846 | 0.26356951  | 0.100922418 |
| RTL8A       | 0.552019792 | 0.020478076 | 0.101059008 |
| AC142472.1  | 0.045433889 | 0.9999999   | 0.101168002 |
| PACRGL      | 0.007440798 | 0.225200933 | 0.101169859 |
| AC005726.1  | 0.045436238 | 0.9999999   | 0.101171732 |
| OSBPL11     | 0.027420803 | 0.008341368 | 0.101457071 |
| RUSC1       | 0.00247344  | 0.129931355 | 0.101467865 |
| RALA        | 0.201672465 | 0.002838305 | 0.101485988 |
| SH3KBP1     | 0.35587399  | 0.02071904  | 0.101561665 |
| AC010618.3  | 0.045687791 | 0.9999999   | 0.101570894 |
| EDEM3       | 0.02938559  | 0.000262063 | 0.101788415 |
| SNRPG       | 0.030211311 | 0.585981498 | 0.101910101 |
| NDUFA13     | 0.001845074 | 0.089353458 | 0.102193833 |
| C15orf61    | 0.795010082 | 0.046287975 | 0.102218129 |
| LRP5        | 0.244574934 | 0.006412741 | 0.10229073  |
| EHF         | 0.364530509 | 0.006842473 | 0.102515834 |
| DAAM1       | 0.368976346 | 0.010211809 | 0.102550496 |
| NFIX        | 0.011839987 | 0.462175754 | 0.102774322 |
| BMP1        | 0.006033151 | 0.273539956 | 0.102859272 |
| CCDC51      | 0.623977922 | 0.032321042 | 0.103337192 |
| SLC9A7      | 0.000506633 | 0.09454082  | 0.103449481 |
| TWF1        | 0.085512781 | 0.000519207 | 0.103722099 |
| TPM3        | 0.010486691 | 1.41047E-06 | 0.104022243 |
| CDC34       | 0.08864721  | 0.001121204 | 0.104257745 |
| LINC002481  | 0.047470581 | 0.9999999   | 0.104382614 |
| ATP2B1      | 0.084135907 | 0.000649078 | 0.104850832 |
| CCDC88A     | 0.028783731 | 0.528582889 | 0.104861459 |
| IGSF9       | 0.180925379 | 0.018022503 | 0.105054423 |
| UVSSA       | 0.23444281  | 0.006106991 | 0.105613056 |

|             |             |             |             |
|-------------|-------------|-------------|-------------|
| ZNF83       | 0.634559918 | 0.010577161 | 0.105636205 |
| RPS19       | 0.024763751 | 0.500419306 | 0.105651863 |
| NEIL3       | 0.048315344 | 0.9999999   | 0.105704692 |
| TMC5        | 0.110150272 | 0.00133758  | 0.105847243 |
| ALKBH3      | 0.074610073 | 0.000333772 | 0.105906101 |
| ATG16L1     | 0.002426574 | 0.022841995 | 0.106123885 |
| FOSL1       | 0.36513644  | 0.009231029 | 0.106165933 |
| RAP1A       | 0.005199714 | 0.209425208 | 0.106413796 |
| GOLPH3      | 0.367427722 | 0.012566286 | 0.106551372 |
| NDUFA3      | 0.006703148 | 0.253643695 | 0.10723043  |
| PLPP6       | 0.032830541 | 0.001404806 | 0.107493079 |
| RXRБ        | 0.896454873 | 0.041336099 | 0.10751762  |
| MIR4435-2HG | 0.007151714 | 0.11509904  | 0.10770704  |
| GMFG        | 0.040946699 | 0.889001287 | 0.108722405 |
| GNA11       | 0.368757599 | 0.014946594 | 0.108752865 |
| ITM2A       | 0.048957669 | 0.921411863 | 0.109043767 |
| ADAM8       | 0.001260175 | 0.064753143 | 0.109190214 |
| NRM         | 0.034104336 | 0.407975213 | 0.109195861 |
| KAT6A       | 0.304919043 | 0.008769949 | 0.109274337 |
| COA3        | 0.446756621 | 0.035331944 | 0.109563722 |
| DGKH        | 0.006041116 | 0.187759127 | 0.109634444 |
| TNFSF12     | 0.010615647 | 0.086566659 | 0.109909634 |
| GPBP1L1     | 0.103629581 | 0.000465679 | 0.110026051 |
| CIITA       | 0.373614967 | 0.008226526 | 0.110425061 |
| AMN         | 0.136860221 | 0.001474161 | 0.110489591 |
| GBA2        | 0.586120144 | 0.029727616 | 0.110589465 |
| TCTA        | 0.079198797 | 0.000799168 | 0.110711818 |
| SDCBP2      | 0.191773492 | 0.003712734 | 0.11093616  |
| RDX         | 0.111565375 | 0.015395675 | 0.11110729  |
| GPR137B     | 0.213889322 | 0.003358943 | 0.111659936 |
| STAU1       | 0.1828067   | 0.004596604 | 0.111694082 |
| CAAP1       | 0.43307063  | 0.028971303 | 0.112062462 |
| SH2D1B      | 0.093675586 | 0.002264595 | 0.11226462  |
| FARP1       | 0.134556197 | 0.001213795 | 0.112274917 |
| SELENOP     | 0.25714906  | 0.003574292 | 0.112291552 |
| BIRC5       | 0.922249558 | 0.034148415 | 0.112421652 |
| CEP290      | 0.047635007 | 0.000463752 | 0.112883975 |
| HELZ        | 0.037046115 | 0.000154959 | 0.113168745 |
| MIER3       | 0.168070959 | 0.002091041 | 0.113255335 |
| MIR194-2HG  | 0.385443772 | 0.012531385 | 0.113301188 |
| GNG12       | 0.318938407 | 0.009667889 | 0.113371039 |
| EYA3        | 0.00152049  | 0.022264397 | 0.113383378 |
| WBP2        | 0.16709168  | 0.006199963 | 0.11364224  |

|            |             |             |             |
|------------|-------------|-------------|-------------|
| PRDM16     | 0.786735611 | 0.043462276 | 0.113689518 |
| BABAM1     | 0.009126919 | 0.222218195 | 0.113718941 |
| DENND4C    | 0.01173655  | 0.323722783 | 0.11385639  |
| ZNF629     | 0.727436453 | 0.025277427 | 0.113930903 |
| GALNT7     | 0.234005819 | 0.004022974 | 0.113945976 |
| HINT1      | 0.033227984 | 0.55615609  | 0.113946869 |
| ALDOC      | 0.015287563 | 0.223783178 | 0.114078507 |
| SMIM8      | 0.034860403 | 0.660284598 | 0.114141173 |
| TOX4       | 0.002308773 | 0.163919882 | 0.114279559 |
| NR2C2AP    | 0.012143521 | 0.33130464  | 0.114489512 |
| CENPT      | 0.020741654 | 0.553277368 | 0.114835481 |
| CST3       | 0.004039012 | 1.43844E-05 | 0.114845783 |
| TMPRSS2    | 0.00845695  | 1.39734E-06 | 0.114925064 |
| DHPS       | 0.007371466 | 0.188547629 | 0.115084647 |
| PYCARD-AS1 | 0.239003352 | 0.035762154 | 0.115726223 |
| PIGK       | 0.00164634  | 0.11174484  | 0.115755055 |
| CIPC       | 0.030798744 | 0.703665207 | 0.115808402 |
| RNF113A    | 0.145095116 | 0.00305416  | 0.116343808 |
| ARPC3      | 0.004925731 | 0.113834132 | 0.116400802 |
| CTPS1      | 0.008048906 | 0.175394743 | 0.116437562 |
| ATP5MC2    | 0.018639301 | 0.347887232 | 0.116504996 |
| IRX5       | 0.529251692 | 0.036574175 | 0.11652083  |
| DTD2       | 0.239003352 | 0.012249635 | 0.116620655 |
| FAM210B    | 0.021836274 | 0.000192838 | 0.116714966 |
| CA13       | 0.013345727 | 7.27247E-05 | 0.116758116 |
| QSOX1      | 0.112980603 | 0.001275075 | 0.116798737 |
| PBXIP1     | 0.022374954 | 0.000101493 | 0.116810935 |
| MAP3K1     | 0.13200672  | 0.00497148  | 0.117294958 |
| SLC25A24   | 0.105438389 | 0.00245494  | 0.11737545  |
| HIST1H4C   | 0.179776864 | 0.000182807 | 0.117431206 |
| AKR1B1     | 0.02533811  | 0.407147208 | 0.117496383 |
| LAPTM5     | 0.778654077 | 0.030929714 | 0.117666525 |
| LAMTOR3    | 0.343006156 | 0.012295713 | 0.117708492 |
| ZNF185     | 0.049951367 | 0.804153936 | 0.117860344 |
| CPT1A      | 0.563849578 | 0.009947096 | 0.117922995 |
| NDUFB3     | 0.043862374 | 0.555188531 | 0.118074578 |
| HSD17B2    | 0.128692886 | 0.000660976 | 0.118192472 |
| PTTG1IP    | 0.000143027 | 1.15987E-08 | 0.118194858 |
| ITGA3      | 0.018346605 | 0.326574065 | 0.118592277 |
| MCRIIP2    | 0.021382842 | 0.000409654 | 0.118607865 |
| NFIB       | 0.42570082  | 0.009932807 | 0.118927738 |
| YES1       | 0.251272094 | 0.00679625  | 0.118997622 |
| MBIP       | 0.025242304 | 0.000251434 | 0.118999238 |

|            |             |             |             |
|------------|-------------|-------------|-------------|
| MEIS1      | 0.055068265 | 0.004123659 | 0.119007827 |
| RAMP1      | 0.224396057 | 0.003879404 | 0.119146769 |
| PAFAH1B2   | 0.285618596 | 0.005523454 | 0.119186029 |
| SEC11A     | 0.020204591 | 0.303596451 | 0.119308249 |
| TFG        | 0.325902256 | 0.012231527 | 0.119518334 |
| PLA2G10    | 0.813461294 | 0.041432501 | 0.119574257 |
| GATA6      | 0.02582565  | 0.000162293 | 0.119973751 |
| GADD45GIP1 | 0.016355989 | 0.201391764 | 0.120117172 |
| EXOC3L4    | 0.051318786 | 0.000484903 | 0.120179549 |
| KHDC4      | 0.003724817 | 0.16015753  | 0.120419155 |
| FRAT2      | 0.269976024 | 0.008350737 | 0.120586266 |
| ZNF761     | 0.01940105  | 0.001856445 | 0.120587808 |
| COPS4      | 0.10082235  | 0.001114622 | 0.120595431 |
| JUN        | 0.021906407 | 5.48507E-05 | 0.120877971 |
| CYBA       | 0.003822481 | 0.138093186 | 0.121013393 |
| UBD        | 0.643374347 | 0.038287406 | 0.121123996 |
| POLR1A     | 0.120760345 | 0.009272672 | 0.12113508  |
| PAPSS1     | 0.61368569  | 0.040028687 | 0.121544171 |
| MTIF3      | 0.504577801 | 0.047787367 | 0.12160462  |
| INTS6L     | 0.020725567 | 0.225200933 | 0.122068048 |
| CCL2       | 0.065249026 | 0.011196797 | 0.122204716 |
| AC027644.3 | 0.404260745 | 0.020821157 | 0.12222426  |
| TIGD1      | 0.033611188 | 0.225200933 | 0.12228042  |
| IGBP1      | 0.000892466 | 0.041826818 | 0.122325444 |
| ZNF669     | 0.003435452 | 0.357653206 | 0.122487336 |
| CCDC97     | 0.000406844 | 0.089972238 | 0.123065639 |
| MT-CO3     | 0.002585654 | 0.092443609 | 0.123115221 |
| ZBTB43     | 0.142556816 | 0.00631654  | 0.123129223 |
| PAWR       | 0.413977708 | 0.041209045 | 0.123311195 |
| TERF1      | 0.314077042 | 0.006474823 | 0.123419571 |
| STK35      | 0.01474089  | 0.608602528 | 0.123538961 |
| PDLIM5     | 0.012209876 | 4.50519E-05 | 0.123859881 |
| IKBKB      | 0.030166432 | 0.578062714 | 0.124144615 |
| BCAM       | 0.005709561 | 0.180651042 | 0.124151268 |
| MAOB       | 0.101954764 | 0.007628572 | 0.124227884 |
| TMEM238L   | 0.293606487 | 0.006020408 | 0.124398717 |
| UBXN2A     | 0.479816114 | 0.023198821 | 0.124489024 |
| KPNA3      | 2.66606E-05 | 0.000357331 | 0.124618987 |
| AC116366.1 | 0.016073459 | 0.008917479 | 0.124778986 |
| C2CD2L     | 0.266135202 | 0.013689736 | 0.124804416 |
| SUB1       | 0.037727626 | 0.466769346 | 0.124845146 |
| PIM3       | 0.016294392 | 3.23226E-05 | 0.125153774 |
| NFE2L1     | 0.031257689 | 0.462454991 | 0.12517842  |

|           |             |             |             |
|-----------|-------------|-------------|-------------|
| SELENOS   | 0.193300184 | 0.004388862 | 0.125225193 |
| TM9SF2    | 0.269857035 | 0.015184811 | 0.125420133 |
| TNFRSF12A | 0.063363276 | 0.000241419 | 0.126151612 |
| MPDU1     | 0.011518137 | 0.322272876 | 0.126434672 |
| DOPEY2    | 0.655573366 | 0.042032365 | 0.126777053 |
| C11orf54  | 0.010235891 | 0.000207378 | 0.126986419 |
| KIF9      | 0.000839513 | 0.099842    | 0.127002501 |
| AGA       | 0.004129075 | 0.274904321 | 0.127377914 |
| C17orf75  | 0.00352637  | 0.019783155 | 0.127514679 |
| YDJC      | 0.007681355 | 0.213188778 | 0.127599312 |
| TMEM92    | 0.023755996 | 0.480805987 | 0.127961928 |
| CLIP4     | 0.002199677 | 0.130390902 | 0.128099452 |
| CDH1      | 0.071264812 | 0.000404812 | 0.128127858 |
| YIPF4     | 0.115588005 | 0.004306176 | 0.128343143 |
| HSCB      | 0.000241035 | 0.019252629 | 0.128425229 |
| CAPNS1    | 0.002269209 | 0.124368832 | 0.128927253 |
| CES2      | 0.34278444  | 0.020577362 | 0.12904637  |
| MDM4      | 0.019081666 | 0.315886829 | 0.129054994 |
| TM9SF3    | 0.330882916 | 0.032241151 | 0.129079998 |
| DYNC1H1   | 0.01106182  | 0.262163116 | 0.129239576 |
| SESN3     | 0.001569047 | 0.083987526 | 0.129245268 |
| KLK12     | 0.040260609 | 0.225200933 | 0.129248155 |
| ILKAP     | 0.074322798 | 0.002254274 | 0.129385362 |
| ZNF24     | 0.02245763  | 0.000320111 | 0.129392263 |
| DNASE1    | 0.037603626 | 0.364083752 | 0.129403522 |
| ZMIZ1     | 0.371462387 | 0.016303289 | 0.129576202 |
| C5orf30   | 0.207907522 | 0.004301006 | 0.129681151 |
| TMEM60    | 0.107892753 | 0.005720456 | 0.129725257 |
| TMEM171   | 0.00131231  | 6.29079E-06 | 0.129781864 |
| DRAM1     | 0.002587026 | 0.061378806 | 0.130292283 |
| ANXA4     | 0.283288625 | 0.01540349  | 0.13032158  |
| SELENOT   | 0.019182393 | 0.315517074 | 0.13074747  |
| NEBL      | 0.403367391 | 0.019006191 | 0.130830056 |
| AP1S1     | 0.423660791 | 0.025230021 | 0.130974644 |
| KIAA0232  | 0.001042502 | 0.041548524 | 0.130991959 |
| FGD4      | 0.052590681 | 0.002439255 | 0.131003147 |
| BHLHE40   | 0.001178722 | 0.116807395 | 0.131063082 |
| PSMC6     | 0.000150486 | 0.024957847 | 0.131426358 |
| NAPA      | 0.186580578 | 0.002187272 | 0.13158988  |
| ZNF706    | 0.095203243 | 0.002461322 | 0.131598159 |
| DCXR      | 0.04072587  | 0.486422677 | 0.131786007 |
| TMEM217   | 0.026857416 | 0.225200933 | 0.132268757 |
| LAP3      | 0.454073758 | 0.023349784 | 0.13254057  |

|            |             |             |             |
|------------|-------------|-------------|-------------|
| IL18BP     | 0.162993138 | 0.003928993 | 0.13276493  |
| SGMS1      | 0.001191815 | 0.043182498 | 0.13325662  |
| AC009414.2 | 0.645886669 | 0.04243813  | 0.1335487   |
| PTS        | 0.46728625  | 0.032412515 | 0.133772864 |
| WWC3       | 0.028444499 | 0.493796792 | 0.13408876  |
| UCK1       | 0.000713245 | 0.018921342 | 0.134808671 |
| EPOR       | 0.010682847 | 0.225200933 | 0.134913342 |
| HDAC9      | 0.191852468 | 0.004662402 | 0.135045238 |
| PLEKHG2    | 0.022788369 | 0.410509718 | 0.135181262 |
| MALT1      | 0.001387483 | 0.000393665 | 0.135281879 |
| CAVIN4     | 0.642292229 | 0.033638898 | 0.135372207 |
| AURKAIP1   | 0.012848034 | 0.189981166 | 0.135545923 |
| JOSD2      | 0.283339119 | 0.008769189 | 0.13572302  |
| PQLC1      | 0.011645459 | 0.363187373 | 0.135824291 |
| WWTR1      | 0.055341174 | 0.001693929 | 0.135962812 |
| ADPGK      | 0.037817492 | 0.657952434 | 0.136249542 |
| ZNF266     | 0.140541284 | 0.010482223 | 0.136399603 |
| PIK3C2B    | 0.00436825  | 0.092109809 | 0.136601705 |
| TRAPPC12   | 0.031118423 | 0.557845837 | 0.136671035 |
| MT-ATP6    | 0.003764282 | 0.064641362 | 0.137394308 |
| RTP4       | 0.359843387 | 0.011023476 | 0.137400945 |
| ANO6       | 0.014760031 | 0.386700635 | 0.137431186 |
| CTTNBP2NL  | 0.309164001 | 0.030350139 | 0.1375198   |
| MYORG      | 0.023094835 | 0.00099075  | 0.137562233 |
| CARD14     | 0.22689318  | 0.009670331 | 0.138177079 |
| ATP6V1H    | 0.120838426 | 0.0035465   | 0.138318024 |
| EPS8L3     | 0.13476152  | 0.002094874 | 0.138416049 |
| MFGE8      | 0.001063422 | 0.000226285 | 0.138571194 |
| TMEM176B   | 0.55839263  | 0.047098511 | 0.138767707 |
| SOX9       | 0.037021004 | 2.81852E-05 | 0.139057041 |
| SPHK2      | 0.032116015 | 0.565049279 | 0.139181495 |
| TPBG       | 0.036459866 | 0.000466407 | 0.139266067 |
| RPS15      | 0.005474562 | 0.090524866 | 0.139771174 |
| RNF123     | 0.22235829  | 0.008528153 | 0.139925189 |
| ABCA10     | 0.04904322  | 0.649769366 | 0.140037834 |
| PRICKLE2   | 0.015888196 | 0.290898904 | 0.140263102 |
| CYSTM1     | 0.477012165 | 0.039357545 | 0.140277655 |
| EFNA1      | 0.185224913 | 0.008497784 | 0.140295091 |
| AC099518.5 | 0.02257469  | 0.225200933 | 0.140466528 |
| ANKRD39    | 0.006284085 | 0.105165282 | 0.140622917 |
| KIF13A     | 0.583957554 | 0.042132955 | 0.141097125 |
| TMEM41A    | 0.541698629 | 0.035230504 | 0.141105896 |
| AL139393.2 | 0.019733829 | 0.225200933 | 0.141236439 |

|            |             |             |             |
|------------|-------------|-------------|-------------|
| EMP2       | 0.113196575 | 0.000147909 | 0.141677611 |
| LEMD1      | 0.534907922 | 0.018047787 | 0.141810043 |
| SLC15A1    | 0.040613957 | 0.587687779 | 0.142067394 |
| TRIM29     | 0.155041478 | 0.00479013  | 0.142745276 |
| MFSD6      | 0.154509625 | 0.004213679 | 0.14283553  |
| PCBD1      | 0.016501512 | 0.345579292 | 0.14286383  |
| UBE2L6     | 0.451371064 | 0.017393702 | 0.143292212 |
| CDC14B     | 0.305698006 | 0.018379079 | 0.143412092 |
| LYN        | 0.135347064 | 0.003443731 | 0.143550132 |
| AL118506.1 | 0.011335312 | 0.087772526 | 0.143740003 |
| PDGFB      | 0.018211086 | 0.225200933 | 0.144139981 |
| ITGB8      | 0.164843039 | 0.002972791 | 0.144170365 |
| WDR4       | 0.016790022 | 0.40341115  | 0.144215061 |
| CSAD       | 0.036263172 | 0.607380903 | 0.144351784 |
| H2AFJ      | 0.425384109 | 0.02714288  | 0.14478551  |
| SMCHD1     | 0.214767136 | 0.011874815 | 0.14486951  |
| GNB1       | 0.222375753 | 0.005496811 | 0.144893837 |
| ANAPC7     | 0.016109837 | 0.443097889 | 0.14556636  |
| EPN2       | 0.093775134 | 0.002178313 | 0.145580783 |
| AAMP       | 0.185739245 | 0.00549708  | 0.145715531 |
| GNL3       | 0.026484231 | 0.315384339 | 0.145786967 |
| SNX14      | 0.003197372 | 0.031788325 | 0.145888233 |
| MAD2L2     | 0.027795071 | 0.509785253 | 0.145959428 |
| AARSD1     | 0.019561512 | 0.225200933 | 0.146119503 |
| STS        | 0.66086763  | 0.044569027 | 0.146263328 |
| IFIT1      | 0.025857622 | 0.059349247 | 0.146289935 |
| PRDX1      | 0.016106436 | 0.196188065 | 0.146782661 |
| RTN3       | 0.034060961 | 0.45753586  | 0.146877121 |
| SETD4      | 0.006327487 | 0.06746273  | 0.147130818 |
| UBA6       | 0.039270464 | 0.47445248  | 0.147359347 |
| MFHAS1     | 0.075997034 | 0.00205978  | 0.147440743 |
| TNIP1      | 0.020371915 | 9.39481E-05 | 0.147575542 |
| ABL2       | 0.009481582 | 0.095878721 | 0.147703172 |
| YPEL3      | 0.097646488 | 0.005100477 | 0.148025287 |
| RCN2       | 0.323627325 | 0.012019206 | 0.148697333 |
| GATAD1     | 0.289451936 | 0.020142286 | 0.148765537 |
| BPHL       | 0.182729764 | 0.008683789 | 0.148974373 |
| GTF2H2C    | 0.011404958 | 0.278879028 | 0.149114144 |
| NIPSNAP1   | 0.000138282 | 0.015647495 | 0.149312488 |
| PAK1       | 0.360550756 | 0.025177697 | 0.149350591 |
| STX8       | 0.003578867 | 0.217773748 | 0.149384171 |
| HNMT       | 0.380721643 | 0.008280346 | 0.149574918 |
| TMEM115    | 0.245208017 | 0.017857447 | 0.149635381 |



|           |             |              |             |
|-----------|-------------|--------------|-------------|
| SENP2     | 0.517652915 | 0.030143226  | 0.149694705 |
| GPATCH3   | 0.036400385 | 0.394988768  | 0.149741942 |
| SLC10A3   | 0.001427299 | 0.051349133  | 0.14976588  |
| TAPT1     | 0.338356835 | 0.024665134  | 0.149780374 |
| BEAN1     | 0.043669449 | 0.225200933  | 0.149910207 |
| PPTC7     | 0.000699754 | 0.023807279  | 0.150090928 |
| HK2       | 0.168621839 | 0.003448007  | 0.150433889 |
| NR3C2     | 0.427739445 | 0.020017512  | 0.150614151 |
| BCL10     | 0.002465297 | 0.000138634  | 0.150614622 |
| RAB11FIP5 | 0.371519812 | 0.008554067  | 0.151126803 |
| POLR2J3.1 | 0.005577889 | 0.153423083  | 0.151187079 |
| NFKB2     | 0.472666432 | 0.040767477  | 0.151448199 |
| DNAJA2    | 0.154377408 | 0.008813731  | 0.151810624 |
| IFI16     | 9.76419E-05 | 0.008165577  | 0.152106902 |
| RAB9A     | 0.379456204 | 0.015066454  | 0.152113596 |
| PPP1R15A  | 0.000653888 | 9.47993E-07  | 0.15213648  |
| ARF6      | 0.399170989 | 0.042660825  | 0.152466871 |
| AASDHPPT  | 0.196123375 | 0.010551313  | 0.152798436 |
| TIPARP    | 2.51539E-06 | 1.54237E-07  | 0.153144821 |
| MCPH1     | 0.007575957 | 0.266799019  | 0.153456419 |
| MOB3B     | 0.023207322 | 0.000160984  | 0.153555263 |
| NGRN      | 0.499683029 | 0.037338648  | 0.153708915 |
| TAF8      | 0.042531927 | 0.663000699  | 0.153856952 |
| MDM2      | 0.014610693 | 0.236247786  | 0.153881717 |
| CALM2     | 0.372210802 | 0.027445848  | 0.15398146  |
| ICA1      | 0.434201246 | 0.029741841  | 0.154078488 |
| LRRC75B   | 0.132153278 | 0.005282559  | 0.154194125 |
| WDR6      | 0.008279047 | 0.455462763  | 0.154300028 |
| PGP       | 0.021937705 | 0.426480913  | 0.154402993 |
| PLEKHA6   | 0.000256071 | 0.004030198  | 0.154452733 |
| ICAM1     | 0.025482159 | 0.003018715  | 0.154733834 |
| RANBP6    | 0.001516018 | 0.041316948  | 0.155012493 |
| NAB1      | 0.035414762 | 0.001061463  | 0.1551798   |
| SHPRH     | 0.003750364 | 0.063378007  | 0.155784733 |
| ADAM10    | 0.025549393 | 0.000509966  | 0.155792589 |
| TUBB6     | 0.047140188 | 0.5644446663 | 0.156665802 |
| SIGIRR    | 0.170215988 | 0.008605875  | 0.156962457 |
| PUS7L     | 0.000926283 | 0.023676709  | 0.15750215  |
| PINX1.1   | 0.040955249 | 0.301796933  | 0.157693052 |
| EPS8L1    | 0.102076666 | 0.00108807   | 0.157753854 |
| ANXA1     | 0.060346983 | 0.000821344  | 0.158001757 |
| GEMIN5    | 0.239003352 | 0.040054648  | 0.158184905 |
| TPP2      | 0.002307009 | 0.116463935  | 0.158260898 |

|            |             |             |             |
|------------|-------------|-------------|-------------|
| ENC1       | 0.025076239 | 0.350669487 | 0.158367745 |
| MAPK1      | 0.01490174  | 0.000387937 | 0.158459199 |
| RBX1       | 0.035325518 | 0.40301988  | 0.158568201 |
| AP001107.9 | 0.451075582 | 0.028712991 | 0.158930628 |
| TBC1D1     | 0.421239196 | 0.018915889 | 0.158969253 |
| LRP10      | 0.044443796 | 0.000129207 | 0.159042153 |
| PHLDA1     | 0.001329035 | 0.045247748 | 0.15934341  |
| CKAP4      | 0.068243523 | 9.32711E-05 | 0.159360239 |
| SPATA5     | 0.026317719 | 0.572625862 | 0.159417916 |
| COPS2      | 0.063596635 | 0.001674534 | 0.159769041 |
| SERPINB6   | 0.000164934 | 0.001190889 | 0.159860968 |
| MUL1       | 0.407861884 | 0.019104892 | 0.159969218 |
| ZMYM2      | 0.015582021 | 0.237813353 | 0.160089079 |
| TSC22D3    | 0.023621615 | 4.49368E-06 | 0.160478233 |
| KLHL7      | 0.021566782 | 0.498049862 | 0.161186403 |
| DSP        | 0.117429135 | 0.001298291 | 0.161472581 |
| SMYD3      | 0.320701814 | 0.022923264 | 0.161648677 |
| STAM2      | 0.341249685 | 0.01542771  | 0.161710366 |
| HOMER1     | 0.006970052 | 0.16179092  | 0.161744348 |
| SYS1       | 0.009242679 | 0.215200882 | 0.161804351 |
| FANCA      | 0.029183798 | 0.657724528 | 0.161933129 |
| EFCAB11    | 0.022185742 | 0.405671311 | 0.161974966 |
| ZNF615     | 0.097624692 | 0.011335791 | 0.162032205 |
| CDC42BPB   | 0.000218994 | 0.013656271 | 0.162494956 |
| PRSS21     | 0.040897215 | 0.225200933 | 0.162505078 |
| TRMT5      | 0.380936116 | 0.012393154 | 0.162751813 |
| DSG2       | 0.163381857 | 0.009115579 | 0.162918522 |
| MTAP       | 0.346808543 | 0.022975478 | 0.162965767 |
| TATDN1     | 0.033926302 | 0.4397612   | 0.163024873 |
| FOXC1      | 0.22836799  | 0.010030674 | 0.163257393 |
| MARCH6     | 0.007524771 | 0.333293839 | 0.163389978 |
| CDK5RAP1   | 0.00899769  | 4.34509E-05 | 0.163620722 |
| HRAS       | 0.02916318  | 0.404188594 | 0.163733043 |
| KIF23      | 0.041001682 | 0.08294518  | 0.163822869 |
| GPATCH8    | 0.000787757 | 0.02519381  | 0.164040148 |
| COBL       | 0.100049639 | 0.004660049 | 0.164099415 |
| STK40      | 0.041729397 | 0.001095776 | 0.164173838 |
| RIOK1      | 0.026186795 | 0.423976501 | 0.164643691 |
| BNIP2      | 0.026751054 | 0.002815701 | 0.164751185 |
| AHCYL2     | 0.026799745 | 0.00017853  | 0.164801343 |
| IRF1       | 0.011757616 | 0.00026592  | 0.164939006 |
| PAM        | 0.037441145 | 0.397847056 | 0.165270941 |
| STX2       | 0.002649082 | 0.010700634 | 0.165559392 |

|            |             |             |             |
|------------|-------------|-------------|-------------|
| CHMP4B     | 0.001299089 | 4.946E-06   | 0.165739538 |
| PRKCSH     | 0.001277952 | 0.020495342 | 0.166243612 |
| KRT8       | 0.083603651 | 0.001032843 | 0.166298738 |
| EZH1       | 0.001074434 | 0.059337744 | 0.166451502 |
| IFI27      | 0.017540889 | 7.15367E-06 | 0.166526811 |
| APBB2      | 0.011199525 | 0.147192704 | 0.167210531 |
| JAG1       | 0.330017153 | 0.010127576 | 0.167382144 |
| CHFR       | 0.02565621  | 0.5440874   | 0.167778124 |
| BCAP31     | 0.018251521 | 0.271993322 | 0.167795374 |
| RSBN1L     | 0.034215237 | 0.40370389  | 0.168087187 |
| ADPRM      | 0.323623526 | 0.005724601 | 0.168301084 |
| UQCRH      | 0.023258195 | 0.311704085 | 0.16838762  |
| PTPN11     | 0.022478051 | 0.43744929  | 0.168465799 |
| MAP2       | 0.028526871 | 0.225200933 | 0.168476208 |
| TET2       | 0.083350767 | 0.001063288 | 0.168585888 |
| TMEM9B     | 0.070994341 | 0.002317516 | 0.169081487 |
| NADK2      | 0.013989672 | 0.292977057 | 0.169208166 |
| EXOC5      | 0.439223491 | 0.03057205  | 0.169344076 |
| GOLPH3L    | 0.365082785 | 0.022116552 | 0.169761503 |
| INTS5      | 0.010712589 | 0.239692816 | 0.169914315 |
| TNFSF10    | 0.08467519  | 0.001983091 | 0.170436889 |
| PFDN6      | 0.040649442 | 0.519657717 | 0.170626706 |
| PARM1      | 0.118020718 | 0.001847358 | 0.170654996 |
| GPRC5C     | 0.380978831 | 0.028458972 | 0.171051994 |
| RASSF6     | 0.150236774 | 0.002576931 | 0.171310509 |
| ADD1       | 0.02619588  | 0.000299244 | 0.171650539 |
| SYF2       | 0.11849485  | 0.001242986 | 0.17200133  |
| BRD8       | 0.168895237 | 0.008747722 | 0.172049775 |
| CDKN1C     | 0.050046021 | 0.000393081 | 0.172168222 |
| UPP1       | 0.020577945 | 0.252535769 | 0.17221823  |
| ATF6B      | 0.209560824 | 0.013020303 | 0.172397916 |
| ZFP36      | 0.001126762 | 2.81422E-06 | 0.172445336 |
| AC027307.2 | 0.239003352 | 0.04449859  | 0.172583916 |
| CCDC32     | 0.218243388 | 0.008654111 | 0.172786576 |
| RPL13      | 0.033993876 | 0.488854655 | 0.172843338 |
| BAG5       | 0.206022312 | 0.013937722 | 0.173305682 |
| DNAJB6     | 0.111020238 | 0.007971473 | 0.173528128 |
| ERP29      | 0.00384179  | 0.070532642 | 0.173797544 |
| KLF4       | 0.003058645 | 4.87275E-09 | 0.173806139 |
| LPAR5      | 0.239003352 | 0.031909542 | 0.174146235 |
| IST1       | 0.005119787 | 8.18847E-05 | 0.17419694  |
| STK17A     | 0.00334297  | 0.030318588 | 0.174575799 |
| PLEKHA2    | 0.047038032 | 0.003115564 | 0.17485659  |

|            |             |             |             |
|------------|-------------|-------------|-------------|
| RPL18      | 0.030477789 | 0.370481856 | 0.175262764 |
| DUOXA1     | 0.061681052 | 0.002305319 | 0.175335132 |
| POMGNT1    | 0.668065674 | 0.042957924 | 0.17593324  |
| SH3GL1     | 0.337978495 | 0.020899138 | 0.176190231 |
| A4GALT     | 0.229341762 | 0.006308994 | 0.176430922 |
| FAM76B     | 0.002412534 | 0.029261662 | 0.176510034 |
| GRIP2      | 0.239003352 | 0.038589185 | 0.176582329 |
| RAB30-AS1  | 0.009482674 | 0.191346066 | 0.176682992 |
| NPNT       | 0.415625306 | 0.002788386 | 0.176738136 |
| PRELID1    | 0.020941784 | 0.196765818 | 0.176937058 |
| RPL39      | 0.047687277 | 0.527344258 | 0.177123635 |
| INTS12     | 0.007854512 | 0.119509621 | 0.177126023 |
| RAPGEF2    | 0.032247697 | 0.000606407 | 0.177231315 |
| AC137932.3 | 0.239003352 | 0.013312919 | 0.177296844 |
| ERBIN      | 0.037181709 | 0.000857304 | 0.177848207 |
| RBM12      | 0.143020927 | 0.006519606 | 0.177887224 |
| SCAF11     | 0.015861131 | 0.000212361 | 0.178290992 |
| HACE1      | 0.021714303 | 0.225200933 | 0.178380869 |
| MARCKSL1   | 0.082885987 | 0.001486141 | 0.178384529 |
| CEBPG      | 0.463074184 | 0.044653208 | 0.178501055 |
| LAGE3      | 0.017233132 | 0.274630212 | 0.179289858 |
| STT3B      | 0.028686718 | 0.473507957 | 0.179727488 |
| KCTD13     | 0.051940047 | 0.002710098 | 0.179967994 |
| TOMM70     | 0.514884006 | 0.038847243 | 0.180104068 |
| HLA-DRA    | 0.222893339 | 0.005708096 | 0.180272411 |
| EIF3J-DT   | 0.153028483 | 0.004924931 | 0.180569902 |
| MGAT4B     | 0.192126546 | 0.010152676 | 0.181389756 |
| S100A14    | 0.142661364 | 0.001541332 | 0.181465205 |
| ZFP36L1    | 0.00486719  | 0.000373558 | 0.181481752 |
| MTUS1      | 0.150003248 | 0.002910994 | 0.18184503  |
| YTHDF2     | 0.0674038   | 0.002076985 | 0.182384816 |
| MCL1       | 0.074016948 | 0.001863187 | 0.183286555 |
| RND3       | 0.038105911 | 0.001260828 | 0.183401999 |
| MYLIP      | 0.240245015 | 0.017075992 | 0.1835055   |
| TRERF1     | 0.233718296 | 0.01277971  | 0.183607743 |
| FAM83H     | 0.580658122 | 0.048682236 | 0.183776018 |
| PITX1      | 0.150635211 | 0.007366265 | 0.184278482 |
| HLA-A      | 0.030868893 | 0.000797369 | 0.184426877 |
| KPNA5      | 0.481121791 | 0.04213007  | 0.184451091 |
| NEK1       | 0.035538426 | 0.207944948 | 0.184798007 |
| H6PD       | 0.021994395 | 0.233730996 | 0.18521509  |
| GMDS       | 0.294941717 | 0.017396441 | 0.185650372 |
| FBXW4      | 0.24487201  | 0.01327128  | 0.185890869 |

|            |             |             |             |
|------------|-------------|-------------|-------------|
| LAIR2      | 0.530147954 | 0.040974846 | 0.186280511 |
| SFPQ       | 0.038359088 | 0.425293608 | 0.186771136 |
| SEC62      | 0.000307297 | 0.006085601 | 0.186856079 |
| PPM1M      | 0.019120671 | 0.094516284 | 0.186913543 |
| TRAF5      | 0.012601101 | 0.008385906 | 0.18696484  |
| PUM3       | 0.016948236 | 0.168026646 | 0.187013112 |
| ZNF431     | 0.014750072 | 0.156764677 | 0.187089909 |
| TMEM8A     | 0.085567454 | 0.003793482 | 0.187125906 |
| GGT6       | 0.021710744 | 0.225200933 | 0.187367864 |
| PCNP       | 0.128013874 | 0.005947528 | 0.187431562 |
| TCEAL4     | 0.469059601 | 0.044072053 | 0.187722607 |
| ABT1       | 0.014288738 | 0.202017556 | 0.187850239 |
| MT-CYB     | 0.000685812 | 0.00911338  | 0.188093721 |
| SLC2A1     | 0.009933323 | 0.126693105 | 0.18811083  |
| PLXNA2     | 0.185680717 | 0.014237277 | 0.188123328 |
| PJA1       | 0.001665556 | 0.143925119 | 0.188144649 |
| DUSP10     | 0.00031253  | 0.000872618 | 0.188192526 |
| DR1        | 0.187402127 | 0.015520584 | 0.188875221 |
| TMEM176A   | 0.226355567 | 0.012591968 | 0.189027872 |
| TMEM43     | 0.000464218 | 0.050329398 | 0.189098989 |
| FUT3       | 0.004872648 | 2.70905E-05 | 0.189199125 |
| MOSPD1     | 0.023792785 | 0.004740824 | 0.189337954 |
| SLC40A1    | 0.537483358 | 0.04553334  | 0.189370885 |
| AP002807.1 | 0.481530784 | 0.035208026 | 0.189413511 |
| FAM160B1   | 0.404596097 | 0.032125949 | 0.189588242 |
| PURA       | 0.017473994 | 0.27830518  | 0.190081844 |
| ZDHHC18    | 0.123498584 | 0.003386551 | 0.190149091 |
| METTL2A    | 0.001803664 | 0.026290759 | 0.190722566 |
| AFAP1      | 0.149626152 | 0.007641581 | 0.190809364 |
| PPFIA1     | 0.158333956 | 0.007331219 | 0.190895199 |
| TTC7A      | 0.014255911 | 4.65343E-05 | 0.190923233 |
| TM4SF1     | 0.202059628 | 0.004274576 | 0.191041755 |
| PHF13      | 0.019680438 | 0.261570569 | 0.19131947  |
| OASL       | 0.041666771 | 0.027054711 | 0.191366838 |
| BTC        | 0.176449147 | 0.006954189 | 0.191426455 |
| ZNF316     | 0.017358604 | 0.335239406 | 0.191588593 |
| CTDP1      | 0.023366534 | 0.436936554 | 0.191611305 |
| GSE1       | 0.041601942 | 0.423117008 | 0.1917347   |
| ZNF107     | 0.000892316 | 0.027379301 | 0.191935259 |
| TAF3       | 0.021313732 | 0.306139577 | 0.191940475 |
| C19orf18   | 0.042273625 | 0.515406916 | 0.191955064 |
| GTF2F2     | 0.30687254  | 0.047085399 | 0.192054021 |
| MX2        | 0.012114143 | 0.000980131 | 0.192070257 |

|            |             |             |             |
|------------|-------------|-------------|-------------|
| NOSIP      | 0.013993721 | 0.193313829 | 0.192091305 |
| TRIT1      | 0.239003352 | 0.033473084 | 0.192120143 |
| PRELID3B   | 0.039412611 | 0.001381926 | 0.192193371 |
| STAP2      | 0.009780008 | 0.00021712  | 0.192313572 |
| KLHL17     | 0.376780146 | 0.043360841 | 0.192417947 |
| ACOX3      | 0.006041473 | 0.037433948 | 0.19245812  |
| C6orf106   | 0.043005449 | 0.38683799  | 0.192547298 |
| EGLN1      | 0.001871448 | 0.047765843 | 0.19261044  |
| AL078604.2 | 0.239003352 | 0.034021304 | 0.192648088 |
| PSMA3-AS1  | 0.0055659   | 0.149683753 | 0.192656483 |
| DNTTIP2    | 0.2458969   | 0.032984002 | 0.19286074  |
| CDKN2A     | 0.009509567 | 0.00033953  | 0.192954574 |
| NEMF       | 0.015058075 | 0.22282675  | 0.192981583 |
| FOXM1      | 0.015226088 | 0.027787811 | 0.193430771 |
| FBXL8      | 0.015931945 | 0.051272499 | 0.193501456 |
| CPLANE1    | 0.032612323 | 0.083178769 | 0.193556041 |
| SS18L1     | 0.093994507 | 0.003860843 | 0.193561101 |
| TMPRSS4    | 0.000430502 | 0.003404829 | 0.194352195 |
| VDAC2      | 0.149879431 | 0.008169329 | 0.194655253 |
| G3BP2      | 0.026707015 | 0.324728395 | 0.194755534 |
| AC044849.1 | 0.042369235 | 0.399177467 | 0.195130792 |
| PLIN3      | 0.129169122 | 0.002911537 | 0.195146875 |
| MBP        | 0.073852443 | 0.001075061 | 0.1953241   |
| ISCA1      | 0.001285806 | 0.008343457 | 0.195347821 |
| DOCK11     | 0.014769231 | 0.166334066 | 0.195454774 |
| TGDS       | 0.038604586 | 0.642243196 | 0.195518152 |
| ATG12      | 0.030093127 | 0.360244057 | 0.195534664 |
| SEPT8      | 0.314492283 | 0.016505536 | 0.195572138 |
| TOB2       | 0.133276508 | 0.004587062 | 0.196138405 |
| ANKRD27    | 0.239003352 | 0.039875723 | 0.196269686 |
| ZDHHC14    | 0.073970331 | 0.000146611 | 0.196575493 |
| NEK11      | 0.023056589 | 0.25833308  | 0.196603169 |
| CEP162     | 0.240291829 | 0.008893579 | 0.196838342 |
| CNN2       | 0.002698226 | 0.035539348 | 0.196850219 |
| ATXN7L3    | 0.31364594  | 0.032022646 | 0.197177892 |
| RHOF       | 0.015444054 | 6.76287E-05 | 0.197745451 |
| STAMBP     | 0.154166291 | 0.010280086 | 0.198107799 |
| DDX58      | 0.009645327 | 0.260759594 | 0.198199816 |
| FAM83E     | 0.277940389 | 0.016929112 | 0.198546812 |
| MED24      | 0.034970457 | 0.437447866 | 0.198715413 |
| ALG5       | 0.036384116 | 0.319860781 | 0.198848332 |
| USP47      | 0.154595932 | 0.002182737 | 0.198886562 |
| COX6A1     | 0.001325264 | 0.031772377 | 0.198968546 |

|            |             |             |             |
|------------|-------------|-------------|-------------|
| WDHD1      | 0.093213351 | 0.03993127  | 0.199029187 |
| HSD17B8    | 0.023472821 | 0.322670244 | 0.199090754 |
| B3GNT5     | 0.084415096 | 0.003871852 | 0.199380715 |
| PDP2       | 0.105186314 | 0.008963422 | 0.199654029 |
| KDM4A      | 0.385021827 | 0.023779089 | 0.199694624 |
| MFSD3      | 0.24455492  | 0.026655017 | 0.199987084 |
| TBP        | 0.002532871 | 0.001007355 | 0.199998928 |
| TLE4       | 0.089787593 | 0.002436383 | 0.200020901 |
| OSBPL2     | 0.005865706 | 0.134139755 | 0.200501784 |
| PPP4C      | 0.001635249 | 0.031493007 | 0.200616663 |
| AL392172.1 | 0.432646531 | 0.048471401 | 0.200764729 |
| PRPF39     | 0.000627132 | 0.070460803 | 0.200779852 |
| LSAMP      | 0.019025284 | 0.225200933 | 0.200894842 |
| RNF141     | 0.161352516 | 0.007579174 | 0.201039856 |
| MET        | 0.025851607 | 0.000382261 | 0.201560703 |
| BTN3A1     | 0.000589661 | 0.022299551 | 0.202410456 |
| PDE8A      | 0.111931958 | 0.007803397 | 0.202577624 |
| TMEM165    | 0.01397448  | 0.000710864 | 0.202834835 |
| CENPL      | 0.035077701 | 0.287068061 | 0.203996773 |
| B3GAT3     | 0.005473746 | 0.10903958  | 0.204101357 |
| ARL14EP    | 0.01019167  | 0.214644515 | 0.20412493  |
| CS         | 0.001038312 | 0.030905081 | 0.204132365 |
| IRF2BPL    | 0.207711227 | 0.008840168 | 0.204509253 |
| SPTLC1     | 0.208383416 | 0.006003287 | 0.204918531 |
| OCIAD1     | 0.000467196 | 0.010763164 | 0.205235724 |
| SH3GLB1    | 0.025946169 | 0.001520904 | 0.205291702 |
| PKP3       | 0.015205782 | 8.13263E-05 | 0.205570479 |
| NDUFA2     | 0.023844386 | 0.209936548 | 0.205582333 |
| COQ4       | 0.013216329 | 0.330301659 | 0.20563577  |
| ADCY7      | 0.039533512 | 0.225200933 | 0.205797949 |
| ADRM1      | 0.000503453 | 0.007433983 | 0.205886145 |
| FAU        | 0.026994689 | 0.267496121 | 0.206165784 |
| CDS1       | 0.131233465 | 0.007570003 | 0.206469464 |
| TTI2       | 0.535553713 | 0.035939669 | 0.206693065 |
| ERLEC1     | 0.095305718 | 0.001655499 | 0.206750837 |
| CASP4      | 0.411345683 | 0.027867714 | 0.207047554 |
| TP53BP2    | 0.158135127 | 0.009739995 | 0.207109996 |
| MED26      | 0.39531448  | 0.039013221 | 0.207176715 |
| EIF2AK4    | 0.001332408 | 0.042998579 | 0.207273611 |
| SEC22C     | 0.008981842 | 0.134744595 | 0.207359145 |
| MAF        | 0.013013115 | 0.048324062 | 0.207550762 |
| AUP1       | 0.020401195 | 0.162563213 | 0.2077437   |
| SMURF2     | 0.01615227  | 0.330500779 | 0.208332244 |

|            |             |             |             |
|------------|-------------|-------------|-------------|
| TMED1      | 0.003681304 | 0.023694776 | 0.208747838 |
| GPX7       | 0.043940208 | 0.032918933 | 0.209557033 |
| RGS6       | 0.326384434 | 0.022443816 | 0.209585781 |
| CNKS3      | 0.127737636 | 0.013412247 | 0.209643936 |
| RGS14      | 0.022645375 | 0.302929066 | 0.210079742 |
| NRF1       | 0.036991938 | 0.534306814 | 0.210137735 |
| PCGF5      | 0.117430723 | 0.005515108 | 0.210220738 |
| PHLDA2     | 0.138690517 | 0.004250659 | 0.210542626 |
| EHMT2      | 0.031133213 | 0.411790669 | 0.210737476 |
| FXN        | 0.021147404 | 0.267631569 | 0.210944603 |
| DAB2IP     | 0.005581306 | 2.61854E-05 | 0.210954643 |
| ZMYM4      | 0.048831326 | 0.544119917 | 0.211222472 |
| MUTYH      | 0.239003352 | 0.047918087 | 0.211297245 |
| ILF3       | 0.028364668 | 0.53863042  | 0.211321431 |
| MIER1      | 0.298691008 | 0.025710975 | 0.211797426 |
| ALDOA      | 0.049143227 | 0.389031882 | 0.212088841 |
| VCL        | 0.002278934 | 0.020033794 | 0.212095777 |
| ZNF512B    | 0.043106154 | 0.441292982 | 0.212217953 |
| ATP5F1B    | 0.025030849 | 0.313481536 | 0.212431637 |
| AL358472.3 | 0.021599362 | 0.225200933 | 0.212558156 |
| CTDSP1     | 0.007003571 | 0.292062261 | 0.213639184 |
| SLC44A4    | 0.06006475  | 0.001272605 | 0.213942572 |
| PAAF1      | 0.009263558 | 0.142837081 | 0.21410671  |
| CARMIL1    | 0.027908455 | 0.31302377  | 0.214308635 |
| SRSF4      | 0.046487418 | 0.001755907 | 0.214332979 |
| ARID5B     | 0.402583072 | 0.04239581  | 0.215084074 |
| HLA-DRB1   | 0.377781963 | 0.04156235  | 0.215324449 |
| SNX13      | 0.17913677  | 0.007360342 | 0.215442828 |
| GMIP       | 0.035598924 | 0.41197075  | 0.215472324 |
| ETV7       | 0.007351162 | 5.87698E-05 | 0.215844248 |
| NFE2L2     | 0.006783732 | 7.56018E-05 | 0.216116108 |
| ANAPC13    | 0.144083851 | 0.00932658  | 0.216212002 |
| SNAP29     | 0.003482453 | 5.95377E-05 | 0.216661485 |
| SIPA1L1    | 0.011229847 | 0.000732215 | 0.216797634 |
| TBC1D24    | 0.239003352 | 0.032714865 | 0.217194738 |
| PWP1       | 0.52231436  | 0.037738576 | 0.217197487 |
| PTBP3      | 0.001434532 | 2.52282E-06 | 0.217508068 |
| XRN1       | 0.003477089 | 0.151631715 | 0.217535715 |
| SMIM25     | 0.027534412 | 0.225200933 | 0.217919832 |
| CRNKL1     | 0.047515834 | 0.382306859 | 0.218269786 |
| BET1       | 0.001577053 | 2.80716E-05 | 0.218300165 |
| ZNF710     | 0.378204777 | 0.033963213 | 0.218386285 |
| KDM1A      | 0.005264863 | 0.037833069 | 0.218529339 |



|            |             |             |             |
|------------|-------------|-------------|-------------|
| STXBP2     | 0.326121356 | 0.025994742 | 0.218674144 |
| TOR4A      | 0.015673459 | 0.000463754 | 0.218915866 |
| CYTH1      | 0.358669451 | 0.039304119 | 0.219585541 |
| COMMD5     | 0.254445644 | 0.02963638  | 0.220037676 |
| SH3GLB2    | 0.283540711 | 0.021298321 | 0.220168641 |
| PPP2R5E    | 0.050284217 | 0.000851876 | 0.220576481 |
| ANXA5      | 0.039015969 | 0.464412237 | 0.220732909 |
| CHMP4A     | 0.004951425 | 0.094049891 | 0.221342918 |
| SLCO3A1    | 0.01658848  | 6.67156E-05 | 0.221638483 |
| DDIT4-AS1  | 0.239003352 | 0.046451249 | 0.221849734 |
| MICU1      | 0.081405956 | 0.002180962 | 0.22258358  |
| ELOC       | 0.010973548 | 0.144714118 | 0.222739654 |
| TRMT44     | 0.142410481 | 0.013547116 | 0.222813518 |
| AC026979.2 | 0.011236796 | 0.099583465 | 0.222873306 |
| KIF21A     | 0.005242473 | 0.00010324  | 0.222943908 |
| TUFM       | 0.022793185 | 0.211160986 | 0.223197055 |
| PTPRK      | 0.22759333  | 0.022042603 | 0.22346224  |
| BRAP       | 0.404103585 | 0.019325883 | 0.223788145 |
| IRAK3      | 0.002150902 | 0.014755931 | 0.224171692 |
| RNF145     | 0.048102921 | 0.356833964 | 0.224225998 |
| ASB8       | 0.001584562 | 0.002757723 | 0.224234692 |
| ZFAND2A    | 0.164232036 | 0.00925027  | 0.224353729 |
| IL17RC     | 0.289612511 | 0.021255221 | 0.225072935 |
| MT-CO2     | 0.000455838 | 0.00457672  | 0.225203354 |
| SH3RF1     | 0.307352207 | 0.034780226 | 0.225203708 |
| RFNG       | 0.082816724 | 0.004285052 | 0.225210638 |
| MINDY2     | 0.014611358 | 0.142726592 | 0.225702572 |
| RNASEL     | 0.468480932 | 0.007075396 | 0.225713764 |
| DHX16      | 0.021508964 | 0.000928519 | 0.226109853 |
| SUMF1      | 0.392943229 | 0.026451862 | 0.226149087 |
| MPC2       | 0.303361966 | 0.021617795 | 0.226313201 |
| USP18      | 0.051312389 | 0.001272959 | 0.226665817 |
| CREBL2     | 0.021365508 | 0.00194272  | 0.226989014 |
| VAC14      | 0.011573163 | 0.197450806 | 0.227236372 |
| UBTF       | 0.17070316  | 0.008127861 | 0.227489499 |
| PMEPA1     | 0.003251739 | 0.000931058 | 0.228571142 |
| PSMB1      | 0.010380599 | 0.100853702 | 0.228869809 |
| SLC2A13    | 0.00547454  | 8.34088E-05 | 0.228940795 |
| SLC22A18AS | 0.090825472 | 0.005817666 | 0.229003155 |
| CHMP2B     | 0.01146841  | 0.00032126  | 0.229553199 |
| PGK1       | 0.011980219 | 0.094945777 | 0.229604092 |
| C4orf3     | 0.046781213 | 0.35391324  | 0.230076399 |
| SCCPDH     | 0.383669203 | 0.023550686 | 0.230469733 |

|            |             |             |             |
|------------|-------------|-------------|-------------|
| SLC41A2    | 0.193539448 | 0.023221615 | 0.230888978 |
| NTAN1      | 0.038519416 | 0.296194956 | 0.231306899 |
| TUBB       | 0.043316668 | 0.237145255 | 0.231474853 |
| ENDOV      | 0.027808291 | 0.39054204  | 0.231616596 |
| TECR       | 0.042260194 | 0.322838475 | 0.231817659 |
| MRPL1      | 0.034816383 | 0.299491385 | 0.232077531 |
| SNW1       | 0.004677663 | 0.0622566   | 0.232456589 |
| KLC4       | 0.036330606 | 0.406482896 | 0.232459406 |
| FKBP2      | 0.00395461  | 0.044962554 | 0.232461696 |
| SP100      | 0.003025661 | 0.000200065 | 0.232676992 |
| BMP2K      | 0.095737402 | 0.005622513 | 0.232968499 |
| PPP2R2D    | 0.027611645 | 0.000861315 | 0.233294534 |
| SLC10A7    | 0.020061554 | 0.000734878 | 0.233329891 |
| AP006621.3 | 0.044120189 | 0.225200933 | 0.233952859 |
| CLCN2      | 0.047513221 | 0.374751146 | 0.234115114 |
| ARL6IP1    | 0.003904357 | 0.000112494 | 0.23435311  |
| ATP1A1     | 0.047072331 | 0.005466335 | 0.234516904 |
| LSS        | 0.014000975 | 0.224824319 | 0.234574729 |
| RAB11FIP2  | 0.05755471  | 0.004632119 | 0.235102821 |
| TJP1       | 0.008350674 | 5.81267E-05 | 0.235425441 |
| CD46       | 0.003427566 | 0.037828832 | 0.235426238 |
| VPS13C     | 0.251656807 | 0.026493229 | 0.236260105 |
| USP11      | 0.133637096 | 0.010368447 | 0.236431441 |
| THAP2      | 0.000712997 | 0.006045458 | 0.236438055 |
| SNX3       | 0.012161686 | 0.117564186 | 0.236850675 |
| PSEN1      | 0.195605957 | 0.023198195 | 0.23690367  |
| FBXO31     | 0.299706102 | 0.041421585 | 0.237069634 |
| ZBP1       | 0.001091764 | 0.009173502 | 0.237468437 |
| ANKRD9     | 0.003525015 | 1.94092E-06 | 0.237489352 |
| MKRN2OS    | 0.26924622  | 0.031585552 | 0.237713421 |
| FCHO2      | 0.18207472  | 0.006513756 | 0.237973053 |
| RPH3AL     | 0.093314033 | 0.018203402 | 0.238118549 |
| NUDT2      | 0.031875716 | 0.340555754 | 0.238390227 |
| ZDHHC4     | 0.026148128 | 0.209852189 | 0.238770313 |
| RTCA       | 0.007657176 | 0.148334098 | 0.238845004 |
| SF3A1      | 0.094519594 | 0.011330185 | 0.238857053 |
| PPP4R2     | 0.035717041 | 0.000173126 | 0.239191332 |
| KIFAP3     | 0.010241969 | 0.271625132 | 0.239284101 |
| NAP1L4     | 0.130460704 | 0.002994174 | 0.239305565 |
| ELOA       | 0.000498684 | 0.022913505 | 0.239633254 |
| TSPAN13    | 0.0868422   | 0.003651918 | 0.23972967  |
| EHMT1      | 0.12470218  | 0.004188385 | 0.239738462 |
| NUBP1      | 0.410733374 | 0.020798177 | 0.2397606   |

|            |             |             |             |
|------------|-------------|-------------|-------------|
| IGF1R      | 0.18874076  | 0.026004992 | 0.239797423 |
| OAS2       | 0.001810044 | 0.050622952 | 0.239819687 |
| TMEM39A    | 0.018318393 | 0.175799485 | 0.239961558 |
| TAF15      | 0.027411259 | 0.179192429 | 0.240123775 |
| ETS2       | 0.124034216 | 0.003753041 | 0.240243229 |
| RBMS2      | 0.027574614 | 0.001075847 | 0.240556677 |
| PMPCA      | 0.021276714 | 0.204675576 | 0.241032648 |
| GADD45B    | 0.032997927 | 0.000273427 | 0.241587468 |
| SLC39A6    | 0.090829934 | 0.008682049 | 0.242551206 |
| FHDC1      | 0.011198873 | 0.131080746 | 0.242618679 |
| DYNLL1     | 0.133349151 | 0.00387328  | 0.242673935 |
| BTN2A1     | 0.069560978 | 0.001769349 | 0.243165859 |
| RNF4       | 0.041596445 | 0.002876798 | 0.24339657  |
| CYCS       | 0.241213297 | 0.018615846 | 0.243464812 |
| ZSCAN30    | 0.016734645 | 0.174000486 | 0.243704561 |
| ELF3       | 0.011318843 | 0.000332154 | 0.244253626 |
| BCL3       | 0.045218949 | 0.387293211 | 0.244284733 |
| GBA        | 0.002281559 | 5.54579E-06 | 0.244403002 |
| FBXO34     | 0.035977049 | 0.005984724 | 0.244451676 |
| ATG4D      | 0.362550399 | 0.03557342  | 0.244507901 |
| MAG1       | 0.213762109 | 0.027582282 | 0.244828868 |
| AL365226.2 | 0.455384464 | 0.041341545 | 0.245182392 |
| SMIM6      | 0.079342218 | 0.007528825 | 0.245422686 |
| TAF7       | 0.012698361 | 0.000553947 | 0.245586196 |
| OLMALINC   | 0.044355285 | 0.401723638 | 0.245617673 |
| AURKA      | 0.012875474 | 0.029531378 | 0.24573263  |
| EEF1A1     | 0.022162133 | 0.300514675 | 0.245803989 |
| NFKB1      | 0.011170732 | 0.145196506 | 0.246493868 |
| DNAJC7     | 0.046746545 | 0.294534148 | 0.246516341 |
| SELPLG     | 0.538557688 | 0.036402417 | 0.246693202 |
| PHACTR2    | 0.085561683 | 0.008583952 | 0.246974921 |
| TCF7L2     | 0.09959889  | 0.009413998 | 0.247269297 |
| MYO6       | 0.285513189 | 0.032651546 | 0.247438198 |
| IL22RA1    | 0.123762613 | 0.005043226 | 0.247543632 |
| ATP1B1     | 0.079973774 | 0.00282588  | 0.24805794  |
| PARP4      | 0.019496826 | 0.19832293  | 0.248768422 |
| STAM       | 0.027194798 | 0.268538994 | 0.249110075 |
| TNFAIP2    | 0.02261729  | 0.082270475 | 0.249153674 |
| TAB3       | 0.24618099  | 0.022079446 | 0.249297007 |
| IFRD2      | 0.341201202 | 0.022245853 | 0.24935638  |
| SLMAP      | 0.013597143 | 0.000488642 | 0.249370907 |
| UXS1       | 0.038749373 | 9.39347E-05 | 0.249485663 |
| ERGIC3     | 0.020408092 | 0.000384173 | 0.250103035 |

|          |             |             |             |
|----------|-------------|-------------|-------------|
| CDC42    | 0.024139115 | 0.000609454 | 0.250186079 |
| RICTOR   | 0.009688898 | 2.57905E-06 | 0.250347764 |
| FAM208B  | 0.035138645 | 0.310880923 | 0.250461177 |
| C19orf53 | 0.020944902 | 0.193113841 | 0.250703049 |
| KIAA0355 | 0.461419214 | 0.049076487 | 0.251116982 |
| PPM1D    | 0.033283027 | 0.080104792 | 0.25113701  |
| STAT4    | 0.009530246 | 0.103184971 | 0.251241239 |
| AMMECR1  | 0.323801921 | 0.046909695 | 0.251242313 |
| CCSER1   | 0.34154159  | 0.042699071 | 0.251632128 |
| HDLBP    | 0.360483343 | 0.04638075  | 0.252287457 |
| GPS1     | 0.001756319 | 0.086411307 | 0.252643637 |
| CHMP1A   | 0.253339129 | 0.027503896 | 0.253072201 |
| NBL1     | 0.003880818 | 0.037010282 | 0.253484198 |
| C19orf33 | 0.300581276 | 0.023181292 | 0.253740377 |
| GSDMB    | 0.033880454 | 0.000913733 | 0.254086937 |
| IFI27L1  | 0.302974255 | 0.040616779 | 0.254228531 |
| AGO2     | 0.008828577 | 0.034222551 | 0.254775006 |
| CD3EAP   | 0.026825767 | 0.171923147 | 0.255155012 |
| NFAT5    | 0.025022009 | 0.200799377 | 0.255174688 |
| DNPEP    | 0.004204651 | 3.58777E-05 | 0.255259099 |
| FMN1     | 0.073969559 | 0.007723027 | 0.255421362 |
| NR1D1    | 0.147703214 | 0.000169559 | 0.255528046 |
| CSTF2T   | 0.016549432 | 0.19197684  | 0.255622591 |
| ETHE1    | 0.013874619 | 0.143509639 | 0.255662752 |
| NT5C3A   | 0.063113821 | 0.002190757 | 0.255753398 |
| PHKB     | 0.200227435 | 0.008909459 | 0.256169453 |
| HNF1B    | 0.263324001 | 0.019126772 | 0.256206921 |
| PITPNM1  | 0.289528324 | 0.035209746 | 0.256309278 |
| TRABD2A  | 0.022717547 | 0.291828116 | 0.256441042 |
| CXCL5    | 0.004446923 | 7.47067E-05 | 0.256793202 |
| MAPK3    | 0.314407047 | 0.044478751 | 0.256874882 |
| CLN3     | 0.289531066 | 0.028163861 | 0.256881871 |
| IRS2     | 0.111932215 | 0.001421042 | 0.257317502 |
| DGCR2    | 0.072740482 | 0.006580726 | 0.257694232 |
| AP3D1    | 0.035326844 | 0.401971409 | 0.257876592 |
| PCNX3    | 0.018494206 | 0.255039973 | 0.258321793 |
| SZRD1    | 0.258186308 | 0.031604437 | 0.258489029 |
| PPP2CB   | 0.247994219 | 0.028743582 | 0.258718062 |
| SMDT1    | 0.045246527 | 0.307893959 | 0.259093564 |
| ARCN1    | 0.045670906 | 0.000491842 | 0.259724702 |
| RFT1     | 0.006336724 | 0.023999533 | 0.259888413 |
| HRH1     | 0.017187167 | 0.050913052 | 0.260189765 |
| ARL6IP5  | 0.042833695 | 0.290003616 | 0.260298438 |

|            |             |             |             |
|------------|-------------|-------------|-------------|
| CD74       | 0.058612185 | 0.00289836  | 0.260469759 |
| RPS19BP1   | 0.155712589 | 0.008107362 | 0.260605553 |
| CREBRF     | 0.001022204 | 6.70038E-06 | 0.260827208 |
| USP14      | 0.013235247 | 0.171370524 | 0.261391901 |
| GUSB       | 0.189774343 | 0.014724236 | 0.261505716 |
| SOCS2      | 0.039287263 | 0.225200933 | 0.261556649 |
| CDKAL1     | 0.003248697 | 0.252945942 | 0.261652151 |
| UBP1       | 0.010575218 | 0.020093723 | 0.261843418 |
| PPP2R3C    | 0.000237933 | 0.008262548 | 0.261961698 |
| MID1       | 0.051817301 | 0.001887105 | 0.262589846 |
| LARP4      | 0.000287236 | 3.64747E-05 | 0.262609099 |
| ZFAND3     | 0.023789935 | 0.001202049 | 0.262711716 |
| SATB1      | 0.011165162 | 0.000115878 | 0.262805362 |
| CMIP       | 0.005978749 | 0.086236296 | 0.262894746 |
| SLC1A1     | 0.062377208 | 0.011233834 | 0.263105519 |
| COL17A1    | 0.074330926 | 0.000742377 | 0.263457622 |
| ZNF468     | 0.236434983 | 0.018388662 | 0.263776697 |
| BST2       | 0.023189826 | 0.219843157 | 0.264223645 |
| FICD       | 0.045028731 | 0.360702588 | 0.264506612 |
| AC093525.6 | 0.107667493 | 0.008587281 | 0.264604958 |
| PRRC2C     | 0.0001998   | 0.006367013 | 0.264800736 |
| CLDN7      | 0.042264375 | 0.001614519 | 0.2648859   |
| MPP6       | 0.138735182 | 0.027842657 | 0.264966802 |
| SIAH2      | 0.035939118 | 0.450769481 | 0.265047206 |
| ADAMTS6    | 0.021876047 | 0.041976038 | 0.265316131 |
| PDK3       | 0.305825003 | 0.03202782  | 0.265605865 |
| ZMAT2      | 8.3147E-06  | 0.000312664 | 0.265809167 |
| HLA-E      | 0.000177816 | 1.65445E-05 | 0.265908671 |
| OSBPL10    | 0.076914219 | 0.012014922 | 0.26621958  |
| IFNGR1     | 0.021480775 | 0.002342086 | 0.266343753 |
| LARP1      | 0.063472914 | 0.003108375 | 0.266504473 |
| FOXA3      | 0.172220111 | 0.035101984 | 0.266541322 |
| NDC1       | 0.02786317  | 0.304927659 | 0.266558654 |
| OCIAD2     | 0.144552781 | 0.002829007 | 0.26665867  |
| DRAP1      | 0.021108806 | 0.197139535 | 0.266777034 |
| RNF114     | 0.002751504 | 0.031716782 | 0.267322938 |
| ARSA       | 0.009586152 | 0.095241381 | 0.26733194  |
| SRSF6      | 0.272640796 | 0.041627951 | 0.267576972 |
| LINC01426  | 0.028458324 | 0.036482987 | 0.267918121 |
| SLC35D2    | 0.09189051  | 0.009192018 | 0.267992566 |
| IFI35      | 0.167771232 | 0.011696475 | 0.268236113 |
| RELA       | 0.179683265 | 0.015060816 | 0.268369102 |
| LRRC37B    | 0.00513251  | 0.060093057 | 0.268587529 |

|         |             |             |             |
|---------|-------------|-------------|-------------|
| GNG5    | 0.033862935 | 0.000455712 | 0.268604402 |
| SLC9B2  | 0.00927815  | 0.04230259  | 0.268784777 |
| RFFL    | 0.118990936 | 0.006035383 | 0.268822745 |
| GALNS   | 0.245768971 | 0.029921907 | 0.268969315 |
| EIF3M   | 0.044749482 | 0.36510648  | 0.269111505 |
| ALCAM   | 0.048781545 | 0.00055991  | 0.269298113 |
| MTOR    | 0.194083484 | 0.018426477 | 0.26934499  |
| DIP2B   | 0.002751295 | 0.101826744 | 0.269649734 |
| COA5    | 0.005310669 | 0.00011734  | 0.269738266 |
| PURB    | 0.042504315 | 0.003856731 | 0.270009817 |
| OTUD7B  | 0.242009065 | 0.008366152 | 0.270308581 |
| RNF2    | 0.008399318 | 0.096453382 | 0.270902251 |
| ZNF555  | 0.015869068 | 0.114827104 | 0.27098779  |
| PTPMT1  | 0.072374956 | 0.006052574 | 0.271138578 |
| PDAP1   | 0.288935772 | 0.029197414 | 0.271558117 |
| PRDX3   | 0.029399154 | 0.137134041 | 0.271953871 |
| STX12   | 0.008063148 | 6.51005E-05 | 0.272217413 |
| DAZAP2  | 0.06269988  | 0.006292113 | 0.272279003 |
| CDK17   | 0.312083038 | 0.02278879  | 0.272289534 |
| USP42   | 0.36492559  | 0.036963409 | 0.272366396 |
| PRRC1   | 0.12044499  | 0.010739035 | 0.272413418 |
| INTS2   | 0.025084907 | 0.203090058 | 0.272514688 |
| STAT6   | 0.0070918   | 0.000169193 | 0.272868276 |
| COPB1   | 0.015931603 | 0.001217716 | 0.273108211 |
| UBB     | 0.138111431 | 0.005691045 | 0.273110608 |
| EPHA2   | 0.024338763 | 4.18668E-05 | 0.273410558 |
| INO80D  | 0.085373338 | 0.009687575 | 0.273607671 |
| NUDT12  | 0.43280706  | 0.044320714 | 0.274546502 |
| MTCH1   | 0.003126844 | 0.073214732 | 0.274760896 |
| MYO5B   | 0.407803434 | 0.041995967 | 0.275474455 |
| RABGAP1 | 0.238298505 | 0.018998972 | 0.275650755 |
| TPM4    | 0.03567811  | 0.000370851 | 0.275711744 |
| ZNF597  | 0.097633221 | 0.025186259 | 0.275774899 |
| SFN     | 0.134222552 | 0.014472177 | 0.275980133 |
| TACSTD2 | 0.024757329 | 0.000292376 | 0.27625372  |
| SIAH1   | 0.002303901 | 0.000688636 | 0.276276269 |
| COPRS   | 0.003375123 | 0.044309396 | 0.276332928 |
| TAP1    | 0.005125624 | 9.79301E-05 | 0.276563946 |
| FAM50A  | 0.299851647 | 0.028646167 | 0.276848798 |
| TBC1D19 | 0.038007976 | 0.225200933 | 0.276967393 |
| KLHL12  | 0.165177945 | 0.018197334 | 0.277029407 |
| XIAP    | 0.044898161 | 0.294707029 | 0.277409608 |
| COX7A2L | 0.011286955 | 0.24819933  | 0.277477771 |

|            |             |             |             |
|------------|-------------|-------------|-------------|
| SLFN5      | 1.44225E-06 | 0.000432708 | 0.277694464 |
| ASH1L-AS1  | 0.332374796 | 0.026853352 | 0.278120552 |
| DNMBP      | 0.00500971  | 0.000208588 | 0.278343185 |
| FGF12      | 0.040256232 | 0.225200933 | 0.278874998 |
| ITM2B      | 0.019900219 | 0.000328265 | 0.278914013 |
| CNOT4      | 0.360803154 | 0.042740075 | 0.279034543 |
| RRBP1      | 0.013691647 | 0.00016083  | 0.279056082 |
| RC3H2      | 0.105026194 | 0.011620513 | 0.279503017 |
| MAT2A      | 0.004880462 | 0.108693384 | 0.279841718 |
| PROX1      | 0.021023579 | 0.003622257 | 0.280235527 |
| UBE2A      | 0.026507718 | 0.00056564  | 0.280547772 |
| CCP110     | 0.005229306 | 0.013687723 | 0.280561226 |
| GTF3C5     | 0.074337347 | 0.001207215 | 0.280604218 |
| MT-ND4     | 0.000970555 | 0.004423771 | 0.281167337 |
| LRFN3      | 0.030463695 | 0.000144334 | 0.281677072 |
| PPP2R2A    | 0.010254046 | 0.000145483 | 0.28176497  |
| LRRFIP1    | 9.31157E-05 | 0.003356971 | 0.281802283 |
| GNAS       | 0.039252901 | 0.222723293 | 0.281829657 |
| CD9        | 0.098496756 | 0.003918246 | 0.281848634 |
| TAF4B      | 0.044984321 | 0.225200933 | 0.282210121 |
| RIPK1      | 0.034880262 | 0.000823146 | 0.283167534 |
| TRAFD1     | 0.002660472 | 0.000993965 | 0.283527135 |
| SLC12A7    | 0.153285055 | 0.007396694 | 0.284220599 |
| RPL34      | 0.045327039 | 0.304292078 | 0.284501282 |
| SERTAD1    | 0.110901947 | 0.009121254 | 0.284585176 |
| ITGA6      | 0.011942138 | 5.2604E-06  | 0.284918115 |
| USP3       | 0.129176152 | 0.00836511  | 0.286068131 |
| ABLIM1     | 0.028816464 | 0.184836821 | 0.286317819 |
| SMU1       | 0.134558182 | 0.013155395 | 0.286398322 |
| PSME2      | 0.011087773 | 0.09973536  | 0.286550382 |
| PNPT1      | 0.038076952 | 0.29357244  | 0.286692454 |
| ZNF440     | 0.142810999 | 0.031648769 | 0.286887837 |
| LIG4       | 0.079211639 | 0.008329513 | 0.287021873 |
| ZNF225     | 0.047981901 | 0.225200933 | 0.287142619 |
| AC245595.1 | 0.020507364 | 0.262213081 | 0.287429474 |
| RAB25      | 0.316506915 | 0.034275751 | 0.287669081 |
| VAMP3      | 0.14664337  | 0.005096813 | 0.287883193 |
| TMEM18     | 0.586737131 | 0.027291237 | 0.28813656  |
| CALM3      | 0.214908754 | 0.021397772 | 0.288188419 |
| KMT2E-AS1  | 0.043528771 | 0.00381234  | 0.288492227 |
| YJU2       | 0.032256774 | 0.166978609 | 0.289017225 |
| ZNF672     | 0.0745512   | 0.005340272 | 0.289209494 |
| TWISTNB    | 0.008298008 | 0.220546277 | 0.289223568 |

|           |             |             |             |
|-----------|-------------|-------------|-------------|
| DBP       | 0.02793353  | 0.058148813 | 0.289889888 |
| LRRRC58   | 0.276534657 | 0.038490578 | 0.289890387 |
| PRPSAP1   | 0.048204803 | 0.274520919 | 0.290607175 |
| CLP1      | 0.000779869 | 0.011774507 | 0.290948116 |
| COMMD2    | 0.021414675 | 0.278167973 | 0.291002955 |
| EPB41L2   | 0.038995844 | 0.231445549 | 0.291271869 |
| CCDC125   | 0.027438124 | 0.000235898 | 0.292479552 |
| MAD1L1    | 0.206519483 | 0.000742426 | 0.292479944 |
| GSTCD     | 0.047941682 | 0.083523982 | 0.292504974 |
| SLC39A1   | 0.001371197 | 0.010834958 | 0.292536247 |
| MTF2      | 0.046764867 | 0.279019286 | 0.292561544 |
| FRS2      | 0.011252997 | 0.000409    | 0.292597749 |
| MKS1      | 0.047577265 | 0.225200933 | 0.292755926 |
| ANXA2     | 0.083954319 | 0.001989489 | 0.294015774 |
| THUMPD1   | 0.025949768 | 0.000713199 | 0.294647614 |
| STX4      | 0.006030078 | 0.092722882 | 0.29501553  |
| DEK       | 0.497721127 | 0.039876135 | 0.295687729 |
| CASP8     | 0.009071834 | 0.002607024 | 0.295830756 |
| TAF5      | 0.04380097  | 0.329858474 | 0.29601769  |
| KCTD9     | 0.226155403 | 0.034764858 | 0.296163243 |
| PIGH      | 0.001928858 | 0.013077712 | 0.296376632 |
| SERTAD2   | 0.000748205 | 6.1737E-06  | 0.296526742 |
| SRPK1     | 0.002152947 | 0.039774256 | 0.296638615 |
| IFT80     | 0.049612723 | 0.333169779 | 0.296933735 |
| LINC01137 | 0.105261297 | 0.005842773 | 0.296938565 |
| ERCC2     | 0.008929739 | 0.225200933 | 0.297114293 |
| EIF2AK2   | 0.062465929 | 0.009941273 | 0.297316054 |
| LUC7L2    | 0.050074187 | 0.002713994 | 0.297503468 |
| PSMC4     | 0.004020723 | 0.065955418 | 0.297553003 |
| COQ9      | 0.023251079 | 0.001590214 | 0.297646515 |
| ARFGAP2   | 0.282409746 | 0.027636887 | 0.298138856 |
| HECTD3    | 0.259698619 | 0.028598231 | 0.298623249 |
| ZFP37     | 0.099816684 | 0.034914917 | 0.298795862 |
| STXBP5    | 0.41333686  | 0.03027116  | 0.298899451 |
| TMEM41B   | 0.001269005 | 0.007520412 | 0.29985192  |
| TBC1D22B  | 0.223792377 | 0.006614191 | 0.299891503 |
| SLC35D1   | 0.114828545 | 0.024516475 | 0.299945897 |
| PIK3R5    | 0.031321369 | 0.180470148 | 0.300214747 |
| TRMT1     | 0.011156325 | 0.222866235 | 0.300394472 |
| GRIPAP1   | 0.044114383 | 0.003872064 | 0.300968931 |
| CHIC2     | 0.025797027 | 0.00273242  | 0.301162186 |
| S100A13   | 0.041160281 | 0.000477986 | 0.302148801 |
| HIVEP2    | 0.019505018 | 0.16031897  | 0.302568858 |



|            |             |             |             |
|------------|-------------|-------------|-------------|
| ACIN1      | 0.241266163 | 0.02552297  | 0.3025813   |
| ECI1       | 0.06067344  | 0.006263446 | 0.302729416 |
| TMEM179B   | 0.108687221 | 0.007152584 | 0.303154111 |
| TP53I13    | 0.275328263 | 0.031768885 | 0.303167638 |
| WDR82      | 0.046460065 | 0.005247123 | 0.303182153 |
| ZFYVE16    | 0.039308421 | 0.001468962 | 0.303471923 |
| RFX2       | 0.094417035 | 0.035288997 | 0.303563869 |
| UBAC1      | 0.254103805 | 0.037425283 | 0.303699862 |
| NNT        | 0.140681499 | 0.024267387 | 0.303761286 |
| UBAC2      | 0.075865776 | 0.004855987 | 0.30390264  |
| KNOP1      | 0.037543543 | 0.001673288 | 0.304092596 |
| CDKN2B     | 0.216798249 | 0.007230663 | 0.304506151 |
| REEP5      | 0.024158884 | 0.151617337 | 0.304532492 |
| BZW1       | 0.108702986 | 0.005423205 | 0.304716834 |
| AC005332.7 | 0.157949052 | 0.005553994 | 0.305109085 |
| WASHC4     | 0.001252025 | 0.019530119 | 0.305340282 |
| BTG3       | 0.037383915 | 0.268117925 | 0.30545573  |
| PTPN2      | 0.037542894 | 0.233413704 | 0.305592203 |
| ACVR1B     | 0.023835849 | 0.00053255  | 0.305787002 |
| BCL2L13    | 0.003585367 | 0.000209654 | 0.305846516 |
| UGGT2      | 0.004258714 | 0.057898646 | 0.30605872  |
| SDF2       | 0.044678122 | 0.261198973 | 0.306075785 |
| CCDC43     | 0.244587367 | 0.03754274  | 0.306321715 |
| SFSWAP     | 0.049795603 | 0.005189929 | 0.306412128 |
| MAF1       | 0.185521174 | 0.011303314 | 0.306414562 |
| LRRCC1     | 0.003736695 | 0.03301126  | 0.306705411 |
| DOHH       | 0.084188414 | 0.006777873 | 0.306909248 |
| GNAI3      | 0.022047778 | 0.001385064 | 0.307025599 |
| ANKRD12    | 0.088426573 | 0.007871388 | 0.307028137 |
| EIF4E2     | 0.186574219 | 0.018019659 | 0.307057348 |
| DPP3       | 0.009189071 | 0.001660462 | 0.30711145  |
| MT-ND1     | 0.000199953 | 0.002309039 | 0.307447198 |
| C1orf112   | 0.359608838 | 0.049920071 | 0.307537108 |
| TPT1       | 0.016291723 | 0.000232872 | 0.307645348 |
| PARL       | 0.001513667 | 0.006602368 | 0.307730224 |
| FAM222A    | 0.027032099 | 0.001337066 | 0.307908757 |
| PTPRA      | 0.025451811 | 0.009616097 | 0.308307833 |
| PIM1       | 0.006923072 | 0.037497082 | 0.308540791 |
| POLR2M     | 0.086702994 | 0.009222983 | 0.308950706 |
| KDSR       | 0.010291449 | 0.000269398 | 0.309178974 |
| SLC8B1     | 0.018854926 | 0.000322769 | 0.309380048 |
| CDK16      | 0.00704409  | 0.000152334 | 0.309429424 |
| GCDH       | 0.038986164 | 0.395540385 | 0.309580716 |

|            |             |             |             |
|------------|-------------|-------------|-------------|
| SPIN4      | 0.09670882  | 0.037896408 | 0.309787023 |
| CDA        | 0.049740424 | 0.213056036 | 0.311824118 |
| TLNRD1     | 0.019564867 | 0.001807196 | 0.311830186 |
| NBEAL1     | 0.040309415 | 0.322698394 | 0.311995534 |
| LCLAT1     | 0.012324677 | 0.172285526 | 0.312115582 |
| AL139246.5 | 0.040495465 | 0.160624473 | 0.312173685 |
| CHMP2A     | 0.016613064 | 0.00081001  | 0.312405749 |
| BEND3      | 0.404190852 | 0.031080577 | 0.312788319 |
| CSRP1      | 0.011485059 | 0.104285034 | 0.31297935  |
| CCDC93     | 0.007869621 | 0.095890416 | 0.313741607 |
| NELFB      | 0.028541455 | 0.264307044 | 0.31404153  |
| SNIP1      | 0.040795257 | 0.219681603 | 0.31409633  |
| IP6K2      | 0.015657104 | 0.00809831  | 0.314441638 |
| ARPC2      | 0.031008927 | 0.140450089 | 0.314500667 |
| TMEM129    | 0.024066714 | 0.194859634 | 0.314558512 |
| TMEM242    | 0.005106423 | 0.1657805   | 0.314938318 |
| WNT4       | 0.545603043 | 0.040348235 | 0.315245598 |
| POC5       | 0.098231424 | 0.007737618 | 0.316201904 |
| TOR1AIP2   | 0.000803445 | 5.35205E-05 | 0.31652355  |
| MARCH5     | 0.002865634 | 0.032687677 | 0.316573757 |
| ZNF438     | 0.018708089 | 0.160862395 | 0.31679307  |
| WDR55      | 0.225164241 | 0.035315069 | 0.317051155 |
| FASTKD1    | 0.004553125 | 0.10363661  | 0.317097857 |
| MAPRE2     | 0.114596506 | 0.003984208 | 0.317221048 |
| COX4I1     | 0.070691824 | 0.001794201 | 0.317370722 |
| VPS26A     | 0.08073571  | 0.005175353 | 0.317874921 |
| IL15       | 0.008787538 | 0.083147154 | 0.318477139 |
| AP003486.1 | 0.09670882  | 0.031733967 | 0.318486257 |
| UACA       | 0.055472723 | 0.002116782 | 0.318836106 |
| PGM3       | 0.321943976 | 0.030098016 | 0.318838203 |
| NFKBIA     | 0.003949923 | 0.055713813 | 0.318859734 |
| UQCR10     | 0.350900539 | 0.029955469 | 0.319206232 |
| PDPK1      | 0.058395757 | 0.007393814 | 0.319926059 |
| KYNU       | 0.004078605 | 0.14223827  | 0.320408605 |
| DHCR7      | 0.011061391 | 0.074463622 | 0.320467757 |
| OTULINL    | 0.254286029 | 0.020266576 | 0.32058409  |
| VARS2      | 0.091538177 | 0.015262009 | 0.320896211 |
| SDCCAG8    | 0.024574672 | 0.213943701 | 0.320968318 |
| MYL12B     | 0.008051638 | 9.44296E-05 | 0.321238738 |
| ZSCAN31    | 0.278259479 | 0.04290834  | 0.321635671 |
| MEF2D      | 0.016759884 | 0.00073042  | 0.321889689 |
| KLHDC4     | 0.003520542 | 0.008450094 | 0.321956631 |
| CCNH       | 0.086477988 | 0.010108858 | 0.322461412 |

|            |             |             |             |
|------------|-------------|-------------|-------------|
| LURAP1L    | 0.114514456 | 0.020155426 | 0.322944478 |
| FKBPL      | 0.011696869 | 0.125209489 | 0.322987235 |
| HMGN4      | 0.045681944 | 0.026992199 | 0.323117489 |
| SCOC       | 0.15728332  | 0.010624955 | 0.323238158 |
| IL32       | 0.022586992 | 0.000895604 | 0.323425705 |
| XKR9       | 0.00032408  | 0.00393546  | 0.323749112 |
| ATP5F1D    | 0.026751098 | 0.187431861 | 0.324271205 |
| UFM1       | 0.016579067 | 0.177650992 | 0.324461861 |
| ZNF606     | 0.043574995 | 0.225200933 | 0.324473684 |
| ZNF117     | 0.02895063  | 0.041998611 | 0.32492582  |
| CCDC57     | 0.021228069 | 0.188792605 | 0.325197841 |
| TALDO1     | 0.048662832 | 0.255352316 | 0.325216266 |
| RETREG2    | 0.07505041  | 0.010291568 | 0.325321281 |
| PRPF40A    | 0.007277696 | 0.096991987 | 0.325331121 |
| MB21D2     | 0.279125126 | 0.012444568 | 0.325549718 |
| TOM1L1     | 0.315348794 | 0.039565089 | 0.325845793 |
| NUB1       | 0.037345095 | 0.006481807 | 0.325947253 |
| NSF        | 0.264569264 | 0.044230705 | 0.326241645 |
| FBXO8      | 0.073916048 | 0.007707818 | 0.326588446 |
| AC004130.1 | 0.038342883 | 0.093327347 | 0.326857377 |
| GAA        | 0.153185112 | 0.015077442 | 0.327766877 |
| FOSB       | 0.032103993 | 0.002513318 | 0.327816172 |
| PLBD2      | 0.11815757  | 0.004290658 | 0.328316834 |
| ZNF37A     | 0.023464979 | 0.14234743  | 0.328517713 |
| STK26      | 0.015233463 | 0.062064992 | 0.32878762  |
| GCFC2      | 0.097500646 | 0.011523046 | 0.328800918 |
| HSPA2      | 0.239003352 | 0.034964383 | 0.32891347  |
| PRKCI      | 0.165029574 | 0.0131282   | 0.329066817 |
| SDCBP      | 0.131709248 | 0.013617557 | 0.329079923 |
| ZNF570     | 0.044559243 | 0.225200933 | 0.329302326 |
| ADCK2      | 0.159491257 | 0.037829978 | 0.329572883 |
| PPM1B      | 0.172933268 | 0.027795184 | 0.329823345 |
| SRP54      | 0.027138921 | 0.148992785 | 0.330181229 |
| CDK2AP2    | 0.024586796 | 0.248625799 | 0.330269573 |
| RAC1       | 0.166341275 | 0.028609736 | 0.330317279 |
| PHETA2     | 0.0030216   | 0.082998907 | 0.330543001 |
| RAD51B     | 0.191369982 | 0.02789363  | 0.330821582 |
| GTF3C3     | 0.026185328 | 0.206266455 | 0.33114372  |
| CTBP2      | 0.009608654 | 0.000206102 | 0.331611579 |
| ERP44      | 0.030304532 | 0.002066564 | 0.332049664 |
| MPZL1      | 0.009094458 | 0.073068207 | 0.332078966 |
| TMEM161A   | 0.018435909 | 0.170834503 | 0.332225984 |
| CMTR1      | 0.043148635 | 0.252553929 | 0.33325815  |

|              |             |             |             |
|--------------|-------------|-------------|-------------|
| ATXN1L       | 0.04204188  | 0.010244503 | 0.334368858 |
| SAMD4A       | 0.479112029 | 0.049212632 | 0.334633846 |
| UHMK1        | 0.165563536 | 0.022526991 | 0.335018504 |
| PTPN14       | 0.024048418 | 0.165576743 | 0.335636053 |
| GTF2I        | 0.20382307  | 0.044031333 | 0.336081455 |
| GDA          | 0.243951981 | 0.036306224 | 0.336348857 |
| SUPT20H      | 0.048628617 | 0.315174354 | 0.336651154 |
| NDFIP2       | 0.224348606 | 0.038320317 | 0.33670103  |
| FAM91A1      | 0.068881285 | 0.001505866 | 0.336960365 |
| DUT          | 0.245144483 | 0.038963383 | 0.33717906  |
| MRPS35       | 0.2271253   | 0.013363351 | 0.337190383 |
| PLXNB2       | 0.212249569 | 0.032562155 | 0.338123701 |
| SEC14L1      | 0.00444182  | 0.039851002 | 0.338377605 |
| EPB41L4A-AS1 | 0.044456103 | 0.289002348 | 0.338558856 |
| TPPP         | 0.162208173 | 0.003741314 | 0.33887033  |
| HELQ         | 0.004686579 | 0.037121914 | 0.338926603 |
| NFATC2IP     | 0.000892993 | 0.009890508 | 0.339093007 |
| SPCS2        | 0.020589288 | 0.094760126 | 0.339167193 |
| AP3B1        | 0.003625635 | 0.041438597 | 0.339222937 |
| AAMDC        | 0.018568897 | 0.083316929 | 0.339382299 |
| SMARCD1      | 0.001531541 | 0.010724565 | 0.339469027 |
| MARCH3       | 0.198796791 | 0.007213033 | 0.340162991 |
| EIF4G2       | 0.081739022 | 0.006223529 | 0.340230779 |
| FAM219A      | 0.154636606 | 0.030601773 | 0.340921475 |
| LARS2        | 0.04106632  | 0.338052462 | 0.340949251 |
| POLH         | 0.035650629 | 0.197803274 | 0.341175904 |
| IP6K1        | 0.219378044 | 0.035471214 | 0.341313748 |
| RAB14        | 0.29366869  | 0.039376682 | 0.342274868 |
| MORF4L2      | 0.038124811 | 0.004277535 | 0.342504318 |
| AHR          | 0.027650896 | 0.002450663 | 0.342513936 |
| HID1         | 0.206167912 | 0.047272685 | 0.342551134 |
| NEDD9        | 0.007623421 | 0.000228552 | 0.34266376  |
| MFSD11       | 0.033507325 | 0.101539237 | 0.342793607 |
| FCGRT        | 0.284322597 | 0.048622711 | 0.343341412 |
| UBLCP1       | 0.000268152 | 0.000307273 | 0.343545526 |
| BCL2L14      | 0.05556374  | 0.005168225 | 0.34386403  |
| B4GALT1      | 0.006898904 | 0.04389226  | 0.343872913 |
| PRRG2        | 0.043292482 | 0.259402916 | 0.34397473  |
| IFT172       | 0.078722608 | 0.013199819 | 0.344166305 |
| PPP1R12A     | 0.000493602 | 0.018424003 | 0.344236665 |
| GLRX5        | 0.149996569 | 0.011823558 | 0.344638714 |
| SETX         | 0.034665863 | 0.174407642 | 0.344905333 |
| CNEP1R1      | 0.087791721 | 0.006719154 | 0.34491725  |

|          |             |             |             |
|----------|-------------|-------------|-------------|
| CLCN3    | 0.017311786 | 0.05295095  | 0.345866369 |
| GIN1     | 0.04321141  | 0.317658579 | 0.345971924 |
| MARCH9   | 0.347617858 | 0.031038886 | 0.346113954 |
| FBLIM1   | 0.071974468 | 0.005073012 | 0.346271665 |
| AAED1    | 0.038775367 | 0.186612045 | 0.346303735 |
| SH3PXD2A | 0.001370297 | 0.011062572 | 0.346308544 |
| PNPLA4   | 0.174212202 | 0.024308317 | 0.346557124 |
| ZNF580   | 0.120724193 | 0.016121898 | 0.346985456 |
| PDGFA    | 0.200543769 | 0.028585406 | 0.347013063 |
| IER2     | 0.01559923  | 0.00031767  | 0.347217176 |
| PSD4     | 0.002463171 | 2.27386E-05 | 0.347225551 |
| DCAF10   | 0.001877422 | 0.000108848 | 0.347486529 |
| CNKSR1   | 6.81804E-05 | 0.001890831 | 0.347589268 |
| ASPH     | 0.013213925 | 0.054989658 | 0.34807662  |
| HIGD1A   | 0.299637    | 0.040575708 | 0.348087557 |
| PAN2     | 0.239003352 | 0.014384811 | 0.348247422 |
| SEMA3F   | 0.025178836 | 0.000466373 | 0.348303766 |
| ATXN2    | 0.080688406 | 0.005403107 | 0.348473088 |
| NR1D2    | 0.215317378 | 0.027722309 | 0.348581474 |
| SHOC2    | 0.090302284 | 0.00604907  | 0.348699717 |
| SAMSN1   | 0.017297286 | 0.19181661  | 0.348889874 |
| PPM1F    | 0.04969828  | 0.384267074 | 0.349062525 |
| CCDC71L  | 0.039982713 | 0.302526594 | 0.349111197 |
| MAP3K11  | 0.081661579 | 0.006064267 | 0.349483581 |
| TRIM5    | 0.001410756 | 0.015920656 | 0.349549438 |
| FNTB     | 0.023400483 | 0.001847305 | 0.349790171 |
| RNF103   | 0.065915194 | 0.003649834 | 0.349795304 |
| LRRC41   | 0.00893308  | 0.015753031 | 0.349841346 |
| DIAPH1   | 0.001783128 | 4.19047E-05 | 0.35043187  |
| ELMO2    | 0.137954901 | 0.015248146 | 0.350646921 |
| HP1BP3   | 0.028885557 | 0.151170226 | 0.351475396 |
| MBOAT1   | 0.021237839 | 0.098722665 | 0.35151673  |
| RNPEPL1  | 0.110160725 | 0.013105261 | 0.351727302 |
| SLC7A1   | 0.138316599 | 0.011363141 | 0.351788366 |
| REPS1    | 0.004561842 | 0.00319654  | 0.351833488 |
| SEC23IP  | 0.098719947 | 0.032386759 | 0.351965346 |
| ADGRG1   | 0.158573991 | 0.038495347 | 0.35198852  |
| TTC9     | 0.2181001   | 0.044181597 | 0.352060886 |
| DPM3     | 0.009248286 | 0.053748547 | 0.352357046 |
| GNPDA2   | 0.017858482 | 0.222828062 | 0.352678468 |
| KHDRBS1  | 0.139072486 | 0.015425852 | 0.352804862 |
| DCTN1    | 0.005621859 | 0.079151358 | 0.352972869 |
| ZC3H15   | 0.043408745 | 0.003960139 | 0.353255463 |

|            |             |             |             |
|------------|-------------|-------------|-------------|
| CCDC50     | 0.170996898 | 0.02528828  | 0.353275439 |
| LIMD1      | 0.0642498   | 0.011815677 | 0.353406456 |
| GADD45A    | 0.329958862 | 0.024631571 | 0.353608206 |
| IARS2      | 0.042065092 | 0.343734532 | 0.353694758 |
| AC025580.2 | 0.239003352 | 0.034125602 | 0.353748216 |
| ADSS       | 0.001619928 | 0.00835486  | 0.353785965 |
| FARP2      | 0.373098941 | 0.030276424 | 0.353885134 |
| CGRRF1     | 0.072466679 | 0.008908233 | 0.353911215 |
| LINC00511  | 0.065458953 | 0.001512724 | 0.354184578 |
| PEX7       | 0.026919225 | 0.008617752 | 0.354430994 |
| ZBED4      | 0.117015896 | 0.0091162   | 0.354474968 |
| RHBDD2     | 0.010028605 | 0.111119936 | 0.354764861 |
| HCCS       | 0.021020593 | 0.004891218 | 0.354909655 |
| TBC1D25    | 0.01600914  | 0.009602527 | 0.355106477 |
| OAZ2       | 0.000324849 | 0.003958989 | 0.355827113 |
| CABLES2    | 0.224730031 | 0.046746325 | 0.355953214 |
| THBS3      | 0.022576308 | 0.195194514 | 0.356253495 |
| MUC12      | 0.034620759 | 0.022622672 | 0.356750251 |
| RNH1       | 0.000113508 | 0.005631259 | 0.356830212 |
| RPS12      | 0.043995703 | 0.266754823 | 0.357211389 |
| EXOC7      | 0.148778063 | 0.028444978 | 0.357299792 |
| MRGBP      | 0.007133124 | 0.057033552 | 0.357329879 |
| PELI3      | 0.113004365 | 0.02609654  | 0.357611294 |
| CCRL2      | 0.032525287 | 0.005256577 | 0.357895716 |
| CD2AP      | 0.012076446 | 0.000700927 | 0.357998131 |
| STAU2      | 0.000549862 | 8.5269E-05  | 0.358519492 |
| CA11       | 0.044525686 | 0.225200933 | 0.359182565 |
| HAUS2      | 0.11088726  | 0.010361497 | 0.359278795 |
| NPEPPS     | 0.265339249 | 0.027912867 | 0.35932162  |
| RHOV       | 0.218196625 | 0.036569959 | 0.359365357 |
| NUCB1      | 0.000992706 | 0.027295764 | 0.359983885 |
| IQGAP2     | 0.063678215 | 0.008918059 | 0.360005397 |
| GCA        | 0.286707758 | 0.031692947 | 0.360022631 |
| COX16      | 0.137786312 | 0.013425008 | 0.360115504 |
| PDSS1      | 0.039762503 | 0.225200933 | 0.360426347 |
| TMF1       | 0.000118044 | 0.002014888 | 0.360443825 |
| EI24       | 0.034193266 | 0.000442851 | 0.360959754 |
| SUPT16H    | 0.062323179 | 0.010304371 | 0.361012114 |
| GTPBP10    | 0.013822167 | 0.060272478 | 0.361034922 |
| MAPK1IP1L  | 0.155527135 | 0.032150318 | 0.361076291 |
| HHEX       | 0.05565106  | 0.016782252 | 0.36107869  |
| SLC4A1AP   | 0.0358914   | 0.16818816  | 0.363184785 |
| EFHD2      | 0.012953506 | 0.001823377 | 0.363335184 |

|            |             |             |             |
|------------|-------------|-------------|-------------|
| FAM177A1   | 0.004365946 | 0.02258035  | 0.363568141 |
| SEC22A     | 0.227792543 | 0.033971884 | 0.364274132 |
| VTI1A      | 0.180803062 | 0.019863507 | 0.364509138 |
| HSD17B7    | 0.02934477  | 0.036516296 | 0.364586002 |
| TTYH3      | 0.045655513 | 0.21524447  | 0.364614905 |
| MAGOH      | 0.028154172 | 0.191486447 | 0.364636929 |
| SORT1      | 0.004273794 | 4.13595E-05 | 0.364905209 |
| ATP5F1C    | 0.040713865 | 0.165835564 | 0.364920335 |
| ABCD4      | 0.009717584 | 0.038660714 | 0.365091147 |
| SSNA1      | 0.295034869 | 0.041421887 | 0.365093768 |
| ZSWIM8     | 0.004976786 | 0.028254404 | 0.365594606 |
| YTHDF3     | 0.013882914 | 0.00019967  | 0.365670877 |
| ZFP41      | 0.093823629 | 0.046723583 | 0.365864496 |
| POGK       | 0.033196672 | 0.011161626 | 0.366223561 |
| SRSF3      | 0.072702371 | 0.004143523 | 0.366587168 |
| APRT       | 0.001411939 | 0.013315799 | 0.367555064 |
| TTC1       | 0.234667402 | 0.020574618 | 0.368234548 |
| MT-ATP8    | 0.005339429 | 0.045621844 | 0.368483826 |
| KIF18B     | 0.039779131 | 0.225200933 | 0.368953588 |
| PNISR      | 0.021347038 | 0.133620863 | 0.370252844 |
| IER5L      | 0.18730856  | 0.030771972 | 0.37046952  |
| C1orf35    | 0.029936787 | 0.244174948 | 0.370784072 |
| PPAN       | 0.025198382 | 0.193620025 | 0.370940598 |
| MEST       | 0.037507708 | 0.220684114 | 0.371013566 |
| BPTF       | 0.00529286  | 0.027946365 | 0.371073536 |
| PPP2R1A    | 0.016106205 | 0.100520145 | 0.371137767 |
| RRAGC      | 0.005128233 | 0.000367862 | 0.372296496 |
| DCLRE1C    | 0.027879345 | 0.00278229  | 0.372496191 |
| SMURF1     | 0.042782762 | 0.002020871 | 0.372879641 |
| SAP18      | 0.001579361 | 2.3149E-05  | 0.373043279 |
| RNFT1      | 0.213290305 | 0.017140812 | 0.373121801 |
| ZNF462     | 0.019557323 | 0.06900064  | 0.373380449 |
| SERINC1    | 0.001973973 | 5.06246E-06 | 0.373471185 |
| LGALS9     | 0.143456464 | 0.023269365 | 0.374079948 |
| GEMIN2     | 0.117692806 | 0.005174664 | 0.37421867  |
| FAAH2      | 0.093184471 | 0.012082295 | 0.374344016 |
| ATP6V0A2   | 0.012315668 | 0.113015088 | 0.374438971 |
| TRAF7      | 0.090920979 | 0.013835634 | 0.374463131 |
| LINC01285  | 0.239003352 | 0.033468215 | 0.375012272 |
| HLA-C      | 0.011751032 | 0.000817127 | 0.375219917 |
| TMEM59     | 0.055941232 | 0.004402541 | 0.375383689 |
| AC004264.1 | 0.09670882  | 0.033896032 | 0.375464687 |
| NSMCE3     | 0.004656055 | 0.03921671  | 0.375803365 |

|            |             |             |             |
|------------|-------------|-------------|-------------|
| UBXN11     | 0.095742506 | 0.022254767 | 0.375912709 |
| GSTK1      | 0.02517466  | 0.140520121 | 0.376229381 |
| SMPDL3A    | 0.072984615 | 0.005074801 | 0.376333474 |
| CLPTM1     | 0.122451602 | 0.003137503 | 0.376492095 |
| HNRNPH2    | 0.052272062 | 0.002386483 | 0.376615272 |
| UBXN6      | 0.116664376 | 0.015449576 | 0.376796608 |
| INTS11     | 0.006630173 | 0.059491685 | 0.377110871 |
| TAP2       | 0.004417994 | 0.028848074 | 0.377406881 |
| DHX58      | 0.01588443  | 0.00245901  | 0.377532029 |
| MORC2      | 0.025023352 | 0.247673933 | 0.377582319 |
| HLA-G      | 0.040281668 | 0.021208214 | 0.37812461  |
| ARHGAP5    | 0.050314038 | 0.00589084  | 0.378569989 |
| RAD50      | 0.018694079 | 0.079171873 | 0.378787013 |
| CCDC12     | 0.172606261 | 0.030043483 | 0.379040615 |
| XPNPEP1    | 0.257217677 | 0.028857184 | 0.379620267 |
| NDUFA5     | 0.008484503 | 0.000920116 | 0.379681612 |
| LAPTM4B    | 0.18441812  | 0.027441168 | 0.379738312 |
| SCAMP1-AS1 | 0.026589235 | 0.034102819 | 0.38014718  |
| PFKL       | 0.012482073 | 0.011142697 | 0.380694123 |
| SH3D19     | 0.071292296 | 0.004259122 | 0.381030591 |
| GNPTG      | 0.043303237 | 0.009507313 | 0.381482796 |
| NFYA       | 0.086480604 | 0.015656079 | 0.381828423 |
| MAP3K4     | 0.027749719 | 0.027534324 | 0.38185876  |
| AC245297.3 | 0.026037062 | 0.129328396 | 0.38222193  |
| FOXN2      | 0.004499342 | 0.000215049 | 0.382663456 |
| C1GALT1C1  | 0.066238073 | 0.001781895 | 0.382855289 |
| DENND1B    | 0.024851898 | 0.16543047  | 0.383081163 |
| PCSK7      | 0.00143048  | 0.003367155 | 0.383185604 |
| HDDC2      | 0.001979342 | 0.005533265 | 0.38373121  |
| ERICH1     | 0.175686572 | 0.037045954 | 0.383782993 |
| CLUAP1     | 0.029273348 | 0.208127183 | 0.383982359 |
| EIF4ENIF1  | 0.040307069 | 0.003754495 | 0.384480399 |
| ZNF121     | 0.006285055 | 0.012345551 | 0.38512522  |
| PDP1       | 0.015374823 | 0.000985144 | 0.385227978 |
| DDX1       | 0.161000761 | 0.023115472 | 0.38524498  |
| MYL6       | 0.012796334 | 0.034261992 | 0.385445941 |
| GAS8       | 0.08247062  | 0.014321999 | 0.385521049 |
| MKNK2      | 0.0391533   | 0.007404921 | 0.385682019 |
| IMPACT     | 0.031914728 | 0.011264864 | 0.38616556  |
| PELO       | 0.049372911 | 0.267034163 | 0.386270505 |
| MUC1       | 0.039211551 | 0.003000163 | 0.386658048 |
| SASS6      | 0.016698218 | 0.036033419 | 0.387560062 |
| PLEKHF1    | 0.018085897 | 0.046335705 | 0.387803069 |



|          |             |             |             |
|----------|-------------|-------------|-------------|
| GTF2A1   | 0.07199587  | 0.013792303 | 0.388753941 |
| SEL1L3   | 0.234369517 | 0.019169138 | 0.388949476 |
| CSTF3    | 0.09358596  | 0.008009879 | 0.389350692 |
| PIGM     | 0.035102886 | 0.146254764 | 0.389758211 |
| ERV3-1   | 0.048728334 | 0.012701778 | 0.389762422 |
| ZNF714   | 0.03847698  | 0.225200933 | 0.390415582 |
| JUNB     | 0.060422251 | 0.009331049 | 0.390460758 |
| JAGN1    | 0.037142057 | 0.213462988 | 0.390616031 |
| CFTR     | 0.017397451 | 0.225200933 | 0.390669092 |
| NDUFB10  | 0.007744678 | 0.049335199 | 0.390709619 |
| SUMO3    | 1.47004E-05 | 9.13906E-05 | 0.390713287 |
| TCEANC2  | 0.196824554 | 0.034832328 | 0.391075098 |
| CEP135   | 0.313939241 | 0.032501899 | 0.391194583 |
| PPA1     | 0.035044219 | 0.040308791 | 0.391219105 |
| FAM174A  | 0.047041953 | 0.005141539 | 0.391327529 |
| DHRS7    | 0.006529554 | 0.092792317 | 0.391338452 |
| DNAJC1   | 0.11570181  | 0.012006558 | 0.391482397 |
| C15orf39 | 0.075008323 | 0.001432336 | 0.39174039  |
| DCTN2    | 0.003061991 | 0.037078671 | 0.391767624 |
| TTC38    | 0.056682423 | 0.005604921 | 0.392529385 |
| C12orf73 | 0.161821792 | 0.033926336 | 0.393906414 |
| GSTO1    | 0.021564675 | 0.085343106 | 0.394014779 |
| GATC     | 0.083951692 | 0.028181483 | 0.394230513 |
| PPIA     | 0.025593537 | 0.10349473  | 0.394258831 |
| RAD23A   | 0.047220846 | 0.002773762 | 0.394284047 |
| CDK18    | 0.001637725 | 0.000142721 | 0.394310131 |
| IRF2     | 0.009115179 | 0.063704316 | 0.394560507 |
| DCTN5    | 0.024028266 | 0.154585232 | 0.394813951 |
| SAR1B    | 0.023658829 | 0.002589946 | 0.394888299 |
| RELB     | 0.034136024 | 0.159868344 | 0.395198046 |
| DYNC1LI2 | 0.058658105 | 0.004712796 | 0.395252264 |
| AGMO     | 0.039190915 | 0.225200933 | 0.395385523 |
| HNRNPUL2 | 0.008448145 | 0.00025818  | 0.39543621  |
| GLRX     | 0.046672167 | 0.166032128 | 0.395473004 |
| TMEM56   | 0.045408698 | 0.225200933 | 0.395512118 |
| DNAJB1   | 0.115962932 | 0.014003648 | 0.396224092 |
| ERI2     | 0.019763974 | 0.004656807 | 0.396621102 |
| ZNF260   | 0.082320808 | 0.014323717 | 0.397303129 |
| PPCDC    | 0.015780336 | 0.039416571 | 0.397588157 |
| TMEM184B | 0.260199878 | 0.028963789 | 0.398016328 |
| DYNLT1   | 0.139716039 | 0.017194462 | 0.398036763 |
| RHOC     | 0.005835916 | 0.000351097 | 0.398124823 |
| VASP     | 0.072221559 | 0.001337416 | 0.398553004 |

|            |             |             |             |
|------------|-------------|-------------|-------------|
| VPS18      | 0.065437755 | 0.004075484 | 0.398573712 |
| DNAJC22    | 0.027552757 | 0.005742053 | 0.398671892 |
| OTUD6B-AS1 | 0.152831155 | 0.03195465  | 0.398922373 |
| ZNF562     | 0.049045757 | 0.146624359 | 0.39903141  |
| HLA-B      | 0.00802439  | 0.000468353 | 0.399321337 |
| CDKN2C     | 0.240294035 | 0.037653234 | 0.399546968 |
| SOCS4      | 0.011683184 | 0.080151878 | 0.399775355 |
| FAM96A     | 0.061727561 | 0.012134411 | 0.399936746 |
| EFNA3      | 0.023365026 | 0.125992629 | 0.400104313 |
| SECISBP2   | 0.201375413 | 0.039157025 | 0.400422706 |
| RUVBL1     | 0.085334385 | 0.015483834 | 0.400775197 |
| BCAR1      | 0.012862743 | 0.001671014 | 0.401220645 |
| SCIN       | 0.095955561 | 0.008127791 | 0.401878672 |
| CCDC9      | 0.050775476 | 0.00506979  | 0.401892946 |
| SERAC1     | 0.09372887  | 0.015084513 | 0.401978854 |
| FAM126B    | 0.020192502 | 0.009157785 | 0.402307448 |
| MBNL2      | 0.012274019 | 0.058391482 | 0.403423976 |
| RREB1      | 0.021075025 | 0.076668992 | 0.404105755 |
| PHGR1      | 0.11841785  | 0.019523359 | 0.40456078  |
| NRBP1      | 0.066670107 | 0.009181467 | 0.404801057 |
| FOXJ2      | 0.027011859 | 0.122091818 | 0.405126921 |
| POLR2F     | 0.033147031 | 0.130189143 | 0.405711368 |
| PSMD12     | 0.024062402 | 0.121197871 | 0.405773368 |
| FNIP1      | 0.002254664 | 2.56917E-05 | 0.406498214 |
| MAFG       | 0.02197112  | 0.005364487 | 0.406629101 |
| CXorf56    | 0.014770116 | 0.22927899  | 0.406722948 |
| SELENOF    | 0.003981676 | 0.031364732 | 0.407120455 |
| COG7       | 0.020173224 | 0.15469392  | 0.407130628 |
| PHLDB2     | 0.168339714 | 0.014665211 | 0.407911697 |
| TBXAS1     | 0.215740672 | 0.044600373 | 0.407925267 |
| CTSB       | 0.023177236 | 0.140274207 | 0.40903606  |
| NMT1       | 0.176806509 | 0.033578909 | 0.409951976 |
| KLHL20     | 0.186541899 | 0.035639684 | 0.410123647 |
| TMEM87B    | 0.004979616 | 0.001365766 | 0.410387022 |
| DSC2       | 0.04438551  | 0.001330998 | 0.410806542 |
| ACTN1      | 0.042448924 | 0.153964416 | 0.410861417 |
| FLAD1      | 0.016585757 | 0.131263412 | 0.411609955 |
| CYB561D1   | 0.097065591 | 0.031913076 | 0.411620285 |
| SPSB3      | 0.007667126 | 0.041177535 | 0.41167043  |
| TDP1       | 0.126233081 | 0.009051358 | 0.411867503 |
| CDHR2      | 0.014026083 | 0.002922061 | 0.411938972 |
| SYNJ1      | 0.016747103 | 0.017998493 | 0.41198392  |
| BCAP29     | 0.022433504 | 0.095716138 | 0.411996067 |

|         |             |             |             |
|---------|-------------|-------------|-------------|
| ANAPC16 | 0.001588621 | 0.003982738 | 0.412197469 |
| HSPA14  | 0.033287163 | 0.007307358 | 0.412403685 |
| ZC3H13  | 0.00976363  | 0.000603367 | 0.412510192 |
| SMIM14  | 0.08135648  | 0.002529369 | 0.412868707 |
| ERGIC1  | 0.088255763 | 0.007142937 | 0.413689187 |
| MTFR1L  | 0.080806776 | 0.005334905 | 0.413901684 |
| ARMH1   | 0.010739688 | 0.109979558 | 0.414217891 |
| PCNX4   | 0.06098662  | 0.003922231 | 0.414536085 |
| RPN2    | 0.004526351 | 0.038284489 | 0.414995431 |
| ECHDC1  | 0.001536005 | 0.014720533 | 0.415104939 |
| AKIP1   | 0.042241447 | 0.024886444 | 0.41541108  |
| DIP2C   | 0.120824591 | 0.009196925 | 0.415539864 |
| C2CD2   | 0.020780859 | 0.008136741 | 0.415765465 |
| STAT3   | 0.005959254 | 0.034998726 | 0.416066493 |
| NELFA   | 0.015086062 | 0.000862887 | 0.416542104 |
| ABCB9   | 0.041690134 | 0.225200933 | 0.416883164 |
| PFDN5   | 0.043927511 | 0.149122769 | 0.417332319 |
| RALBP1  | 0.009663342 | 0.00074953  | 0.417836331 |
| STX5    | 0.023689943 | 0.002185233 | 0.417999563 |
| APOC1   | 0.100177129 | 0.022426914 | 0.418243111 |
| HES6    | 0.016197047 | 0.064923902 | 0.418299829 |
| PGGT1B  | 0.061870843 | 0.005899714 | 0.418795586 |
| CHMP6   | 0.236446318 | 0.019672021 | 0.419117283 |
| EXT1    | 0.011458928 | 0.065723355 | 0.41935663  |
| ARFIP1  | 0.057670207 | 0.014399008 | 0.41942575  |
| LRRC6   | 0.022067059 | 0.225200933 | 0.41947466  |
| MZT2B   | 0.117372082 | 0.007024952 | 0.419583461 |
| RBKS    | 0.015211615 | 0.254205161 | 0.419826132 |
| ZBTB1   | 0.013203217 | 0.106202773 | 0.420066286 |
| PABPC1L | 0.022021066 | 0.018368876 | 0.420192939 |
| POGLUT1 | 0.007704122 | 0.061807672 | 0.420194176 |
| PPP4R3B | 0.229402    | 0.019991719 | 0.420665269 |
| GALNT11 | 0.044707252 | 0.439338059 | 0.420680757 |
| OGFOD1  | 0.01608543  | 0.09548355  | 0.420818372 |
| NELFE   | 0.061771369 | 0.005998053 | 0.420905    |
| TSR3    | 0.026533432 | 0.106622522 | 0.420954156 |
| HNRNPU  | 0.012768215 | 0.001096157 | 0.421054504 |
| TNRC18  | 0.04475137  | 0.009636676 | 0.421185343 |
| SOX4    | 0.008289861 | 0.010887786 | 0.421252094 |
| RNF149  | 9.17469E-05 | 0.000207536 | 0.421528698 |
| SLC35E4 | 0.023875828 | 0.044690774 | 0.421732025 |
| MRPL13  | 0.025942692 | 0.12067364  | 0.421896055 |
| RTF1    | 0.161800413 | 0.025173047 | 0.422268692 |

|            |             |             |             |
|------------|-------------|-------------|-------------|
| ZNF747     | 0.100753963 | 0.022421166 | 0.422669495 |
| MIGA1      | 0.005165686 | 0.006075438 | 0.423264291 |
| FGFR2      | 0.093065314 | 0.03862345  | 0.423441358 |
| ALDH18A1   | 0.033051095 | 0.0184563   | 0.423447233 |
| DGAT2      | 0.039291201 | 0.225200933 | 0.423628654 |
| GULP1      | 0.139481199 | 0.00118341  | 0.423840782 |
| ZNF75A     | 0.099594638 | 0.036588362 | 0.423851046 |
| BROX       | 0.039565645 | 0.118631697 | 0.425139368 |
| ARRDC1     | 0.004738591 | 0.00027961  | 0.425196295 |
| PDE5A      | 0.139885579 | 0.024060715 | 0.425456455 |
| NXT2       | 0.011573395 | 0.078298295 | 0.425543002 |
| PJA2       | 0.002228928 | 0.001781348 | 0.426567352 |
| JADE3      | 0.042787397 | 0.225200933 | 0.426626418 |
| KCNK1      | 0.002463355 | 0.000697561 | 0.426894692 |
| RPL36      | 0.034827863 | 0.138089882 | 0.427061309 |
| MT-CO1     | 0.006187569 | 0.029334825 | 0.427199815 |
| PER3       | 0.22248456  | 0.04811603  | 0.427514727 |
| JPX        | 0.007546394 | 0.001619767 | 0.427576327 |
| CTNS       | 0.016227519 | 0.044864878 | 0.427577325 |
| KRTCAP2    | 0.006627697 | 0.035959591 | 0.427928366 |
| APOL2      | 0.001254892 | 0.03143394  | 0.428014503 |
| CFL1       | 0.012397044 | 0.027971644 | 0.428106487 |
| PNPLA8     | 0.146680611 | 0.049950584 | 0.42821223  |
| AC040162.1 | 0.042509908 | 0.005889761 | 0.428232723 |
| CTSO       | 0.180237928 | 0.043779913 | 0.428546028 |
| SETD6      | 0.233428238 | 0.028276182 | 0.428833938 |
| VPS37B     | 0.117488775 | 0.01235522  | 0.428991002 |
| PRDM8      | 0.020264387 | 0.14610226  | 0.429109263 |
| SURF2      | 0.038574581 | 0.150037339 | 0.42914887  |
| CPNE1      | 0.006655646 | 0.029961542 | 0.429371951 |
| EMP1       | 0.156810618 | 0.016358079 | 0.42993506  |
| PHTF2      | 0.03722341  | 0.073997385 | 0.43085922  |
| HHLA2      | 0.258394126 | 0.009036833 | 0.431178607 |
| CTNND1     | 0.03620144  | 0.00199063  | 0.431375739 |
| MBD5       | 0.033572642 | 0.130276566 | 0.431973547 |
| HIVEP3     | 0.323830776 | 0.014545182 | 0.432001001 |
| PI4K2A     | 0.034056897 | 0.228149531 | 0.432122696 |
| UBE2H      | 0.015092265 | 0.000759845 | 0.432319246 |
| ARHGEF28   | 0.263363236 | 0.043733157 | 0.432338357 |
| UIMC1      | 0.004682446 | 5.16143E-05 | 0.43247199  |
| KRT19      | 0.278208719 | 0.042101275 | 0.433176845 |
| EIF1AX     | 0.108895699 | 0.011720011 | 0.433213248 |
| DISP1      | 0.194854452 | 0.030595342 | 0.433224593 |

|            |             |             |             |
|------------|-------------|-------------|-------------|
| CSF1       | 0.002258188 | 0.022146534 | 0.433243358 |
| S100A11    | 0.013558775 | 0.058215969 | 0.43342927  |
| CNOT11     | 0.010576185 | 0.065291832 | 0.433446227 |
| PSMB8      | 0.046270162 | 0.00205234  | 0.433642303 |
| COX17      | 0.036984249 | 0.001052461 | 0.433746974 |
| CWC25      | 0.017333577 | 0.000728258 | 0.434116856 |
| DYRK1A     | 0.031086782 | 0.001652739 | 0.434157209 |
| BEX4       | 0.041562192 | 0.083672841 | 0.434302523 |
| POLR2C     | 0.09680151  | 0.019019959 | 0.43445697  |
| PLAA       | 0.083906634 | 0.009008879 | 0.434589718 |
| TERF2IP    | 0.000918136 | 0.004349224 | 0.434623948 |
| SNRPD3     | 0.032359014 | 0.191746389 | 0.434884781 |
| CDC42EP1   | 0.178980467 | 0.0178034   | 0.435187497 |
| ADIPOR1    | 0.050748394 | 0.005907193 | 0.435893914 |
| GABPB2     | 0.000459214 | 0.001345593 | 0.435908671 |
| PPIL2      | 0.002919075 | 0.003605105 | 0.436057199 |
| AP006623.1 | 0.003792419 | 0.134165439 | 0.437257102 |
| AP002360.1 | 0.114244275 | 0.042070676 | 0.437888805 |
| GATAD2A    | 0.054943393 | 0.007444259 | 0.438546071 |
| YIPF5      | 0.024906089 | 0.135972214 | 0.438598861 |
| PUM1       | 0.014254057 | 0.133191528 | 0.438656242 |
| PMAIP1     | 0.025812096 | 0.031601196 | 0.439415226 |
| TMEM167A   | 7.44557E-05 | 0.001798286 | 0.440092808 |
| YWHAB      | 0.002960993 | 0.000176007 | 0.440532163 |
| ILK        | 0.005144715 | 0.027583407 | 0.440604089 |
| SEN5       | 0.02123718  | 0.055519837 | 0.440939441 |
| LZTS2      | 0.146224528 | 0.023745243 | 0.441244385 |
| LINC01133  | 0.201724983 | 0.032504226 | 0.441689746 |
| UBALD2     | 0.027431344 | 0.055063474 | 0.441701039 |
| CYBC1      | 0.004307718 | 0.023444621 | 0.44179606  |
| FAHD1      | 4.23521E-05 | 0.000122842 | 0.442369104 |
| SSR4       | 0.012598866 | 0.028478228 | 0.442644347 |
| RBMX       | 0.001119875 | 0.019383839 | 0.442674971 |
| IAH1       | 0.037741773 | 0.174009324 | 0.443304999 |
| TMEM208    | 0.023763226 | 0.11278643  | 0.443835233 |
| MAEA       | 0.047762361 | 0.004388574 | 0.44404321  |
| SLC27A4    | 0.053300355 | 0.037228035 | 0.444044631 |
| LRRC23     | 0.027481583 | 0.02515211  | 0.44423747  |
| VPS37A     | 0.068839849 | 0.014833834 | 0.444992112 |
| BTF3       | 0.036934655 | 0.113030634 | 0.445213079 |
| PHF20L1    | 0.0005256   | 3.83903E-05 | 0.445457155 |
| APOLD1     | 0.0491906   | 0.088128156 | 0.44548478  |
| COL4A3BP   | 0.001146244 | 0.008495429 | 0.445649199 |

|            |             |             |             |
|------------|-------------|-------------|-------------|
| ATM        | 0.035016028 | 0.104854039 | 0.445861547 |
| DYNC1I2    | 0.022388607 | 0.002970563 | 0.446841199 |
| NDUFA8     | 0.215921267 | 0.042223225 | 0.446961404 |
| PRR15      | 0.03698465  | 0.03563124  | 0.447511249 |
| KDELR2     | 0.101555532 | 0.018235379 | 0.448514952 |
| CRAMP1     | 0.049714462 | 0.019948791 | 0.44857489  |
| BRPF3      | 0.040678922 | 0.01664709  | 0.448625907 |
| MYL12A     | 0.0050516   | 8.10745E-05 | 0.448703323 |
| SERINC5    | 0.047506678 | 0.234292549 | 0.448861426 |
| MRPL9      | 0.057394653 | 0.001617509 | 0.449242657 |
| SCAMP4     | 0.001348665 | 0.005168455 | 0.449901975 |
| ZNF140     | 0.04414909  | 0.217161253 | 0.450119476 |
| PAQR4      | 0.09975691  | 0.010968168 | 0.450445818 |
| PLS3       | 0.003992697 | 0.00667952  | 0.450640401 |
| AC018557.1 | 0.239003352 | 0.034609647 | 0.450851278 |
| ERAL1      | 0.106771448 | 0.018491916 | 0.451242462 |
| POLR3GL    | 0.007729515 | 0.042000214 | 0.451590352 |
| RAB40B     | 0.161343575 | 0.023968108 | 0.451884782 |
| GART       | 0.004350278 | 0.032281462 | 0.451971635 |
| ATXN1      | 5.26506E-05 | 0.000242865 | 0.452038198 |
| C12orf57   | 0.028163676 | 0.080472706 | 0.452288383 |
| CD2BP2     | 0.002956944 | 0.022928883 | 0.452925464 |
| ATG2A      | 0.013915835 | 0.001798465 | 0.453076117 |
| RBM15B     | 0.16522441  | 0.007800165 | 0.45381142  |
| KLHL9      | 0.22472262  | 0.035553372 | 0.454222187 |
| ARHGAP35   | 0.038510493 | 0.002530566 | 0.455014273 |
| IDH3A      | 0.058409421 | 0.006149492 | 0.455129645 |
| SOD2       | 0.029994163 | 0.054988142 | 0.455176386 |
| CTDNBP1    | 0.120849928 | 0.014342814 | 0.455408447 |
| DNAJC3     | 0.001287981 | 8.007E-06   | 0.455474767 |
| PACS1      | 0.05501678  | 0.009393231 | 0.456435485 |
| LEPROT     | 2.25682E-05 | 0.001093601 | 0.456475153 |
| TMEM203    | 0.141676033 | 0.035258298 | 0.456827233 |
| SLC25A23   | 0.108066085 | 0.020371485 | 0.457691428 |
| DCAF5      | 4.26101E-05 | 9.11704E-06 | 0.457794234 |
| UNC119B    | 0.239003352 | 0.033754268 | 0.457980423 |
| TMBIM1     | 0.024624268 | 0.00279156  | 0.457994969 |
| LAMTOR1    | 0.101113099 | 0.015074169 | 0.458030803 |
| DESI2      | 0.01010231  | 0.057092013 | 0.45844724  |
| RAP2B      | 0.085144804 | 0.017113236 | 0.458654491 |
| HDAC3      | 0.005725199 | 0.015910574 | 0.458900399 |
| CAMTA1     | 0.007421672 | 0.000245233 | 0.458997488 |
| RHBDF2     | 9.59443E-05 | 0.000137083 | 0.459384925 |

|         |             |             |             |
|---------|-------------|-------------|-------------|
| PPL     | 0.12550416  | 0.026576307 | 0.459528646 |
| ZNF326  | 0.015439109 | 0.087668538 | 0.459791217 |
| VDR     | 0.004230007 | 0.001901918 | 0.460415827 |
| FAS     | 0.010286197 | 0.001686972 | 0.460872765 |
| PSMA5   | 0.037136988 | 0.099089089 | 0.461190789 |
| TMEM216 | 0.064532591 | 0.02115131  | 0.461310831 |
| PTPN21  | 0.023264829 | 0.00318971  | 0.461638481 |
| SLC39A3 | 0.008350064 | 0.04284731  | 0.461713203 |
| GRTP1   | 0.038766886 | 0.015102388 | 0.46217695  |
| NET1    | 0.011730673 | 0.025049772 | 0.462249494 |
| SLC35E3 | 0.027060983 | 0.029346559 | 0.462335738 |
| SPTAN1  | 0.008986677 | 0.000521723 | 0.462651386 |
| S100A2  | 0.054381872 | 0.015529799 | 0.462811433 |
| CCL8    | 0.027904501 | 0.107112479 | 0.463063369 |
| CLPX    | 0.034807031 | 0.002474783 | 0.46314259  |
| TSC22D1 | 0.00856155  | 0.000133011 | 0.464113866 |
| CASKIN2 | 0.023115971 | 0.126545874 | 0.4648933   |
| ANAPC1  | 0.05333244  | 0.002052742 | 0.465163608 |
| TMEM50A | 0.001962771 | 0.010608453 | 0.465622977 |
| TRIP11  | 0.005997673 | 0.000245762 | 0.465875815 |
| PTPRB   | 0.09372887  | 0.013148778 | 0.465912288 |
| ANKFY1  | 0.007779922 | 0.00024477  | 0.465952661 |
| ANXA7   | 0.000193389 | 0.000172105 | 0.465975671 |
| TIMM8B  | 0.039327732 | 0.001594202 | 0.465989617 |
| GRB7    | 0.054317474 | 0.008551741 | 0.466191396 |
| PTAFR   | 0.002289904 | 0.003935208 | 0.466410063 |
| PFDN1   | 0.009917727 | 0.028401122 | 0.466671921 |
| SETD3   | 0.161740804 | 0.047662722 | 0.466944321 |
| FAM120B | 0.011032061 | 0.007258619 | 0.467041452 |
| IFIH1   | 0.020251655 | 0.083608977 | 0.467102256 |
| GALNT5  | 0.160333896 | 0.040391607 | 0.467291541 |
| INO80C  | 0.014360061 | 0.000847995 | 0.467374123 |
| EHD1    | 0.024909632 | 0.152091873 | 0.467416749 |
| RPLP2   | 0.024725596 | 0.130557349 | 0.468166498 |
| DDHD2   | 0.002741361 | 0.014396677 | 0.468245882 |
| SKIL    | 0.034985762 | 0.125785704 | 0.469106193 |
| MRPL40  | 0.042410934 | 0.166290433 | 0.469271885 |
| ZNF888  | 0.108074761 | 0.041004905 | 0.4695915   |
| NR4A2   | 0.142439554 | 0.030891599 | 0.469597271 |
| OGFOD2  | 0.031574715 | 0.072489205 | 0.46979319  |
| DAZAP1  | 0.037330637 | 0.123341392 | 0.469943472 |
| UBR4    | 0.02411422  | 0.137313201 | 0.470553951 |
| MFSD8   | 0.007487098 | 0.08910367  | 0.470626727 |

|           |             |             |             |
|-----------|-------------|-------------|-------------|
| JPT2      | 0.034701896 | 0.104249635 | 0.470788736 |
| UBN2      | 0.005107266 | 0.011210354 | 0.471378883 |
| SCAMP2    | 0.225683011 | 0.049845842 | 0.471633338 |
| DHTKD1    | 0.041909053 | 0.196496482 | 0.472564534 |
| APPL2     | 0.180252355 | 0.019408513 | 0.472633158 |
| LRRC47    | 0.057208127 | 0.004492325 | 0.472833175 |
| PARP9     | 0.00519561  | 0.045472466 | 0.472863479 |
| PDCD2L    | 0.187281703 | 0.035868823 | 0.472988598 |
| ZC3H4     | 0.026779053 | 0.09728134  | 0.473472913 |
| GDPGP1    | 0.164428187 | 0.043729834 | 0.473585871 |
| LINC00467 | 0.028820942 | 0.201082508 | 0.473616453 |
| EIF5A     | 0.038367498 | 0.11995072  | 0.4740911   |
| COX7B     | 0.208839749 | 0.041596502 | 0.474984564 |
| DHRX      | 0.013850515 | 0.034064993 | 0.475032018 |
| NDUFV3    | 0.015151113 | 0.026907157 | 0.475067928 |
| TMEM127   | 0.146364025 | 0.02017739  | 0.475267328 |
| PTER      | 0.023966934 | 0.129766604 | 0.47527178  |
| SHROOM1   | 0.044246148 | 0.019107118 | 0.475609877 |
| SRGAP2C   | 0.048816637 | 0.167583743 | 0.475771515 |
| TRIM22    | 0.008965937 | 0.086329449 | 0.47582048  |
| SPRYD3    | 0.018632266 | 0.1779034   | 0.476211921 |
| DHX57     | 0.02986746  | 0.01237971  | 0.476223729 |
| FZR1      | 0.012167069 | 0.087449514 | 0.476506707 |
| EPHX1     | 0.010506517 | 0.041017806 | 0.476719898 |
| IL10RB    | 0.026367351 | 0.09913887  | 0.476790108 |
| WARS      | 0.033062314 | 0.003546545 | 0.477143078 |
| ACVR1     | 0.06529768  | 0.013710057 | 0.477324798 |
| ADAL      | 0.188167792 | 0.026221068 | 0.477666906 |
| NTMT1     | 0.003229722 | 0.007293428 | 0.477957931 |
| C1orf167  | 0.005399351 | 0.008690304 | 0.478003198 |
| JAK1      | 0.013102656 | 0.08411378  | 0.478377079 |
| PPP3R1    | 0.133858207 | 0.030755314 | 0.478501059 |
| SSB       | 0.041955914 | 0.178246091 | 0.478929162 |
| CEBPD     | 0.060819958 | 0.008785908 | 0.480052972 |
| SLC4A4    | 0.208082671 | 0.015685788 | 0.480096915 |
| PSMD1     | 0.150719985 | 0.043644829 | 0.480441929 |
| SURF4     | 0.131623416 | 0.019263844 | 0.48059222  |
| NCOR2     | 0.159654443 | 0.034967436 | 0.480688399 |
| SRRT      | 0.130819424 | 0.027050793 | 0.480923022 |
| TMEM120B  | 0.081099254 | 0.01459531  | 0.481315075 |
| CTDSP2    | 0.121716379 | 0.044822002 | 0.482390043 |
| ZDHHC12   | 0.033849393 | 0.000989707 | 0.482715538 |
| C6orf222  | 0.010364219 | 0.000201763 | 0.482854768 |



|          |             |             |             |
|----------|-------------|-------------|-------------|
| ABCA1    | 0.121456664 | 0.037317677 | 0.482902844 |
| HNF4A    | 0.028264351 | 0.09431176  | 0.483444322 |
| AKTIP    | 0.019090014 | 0.143960186 | 0.483618364 |
| PCDHGA8  | 0.019131809 | 0.099768973 | 0.484289648 |
| DENND1A  | 0.035640421 | 0.006873299 | 0.484314048 |
| TRMT10A  | 0.028954076 | 0.003794589 | 0.48439858  |
| PSME3    | 0.019034914 | 0.097319204 | 0.484968349 |
| GRHL2    | 0.151132207 | 0.038911636 | 0.485108909 |
| TENT2    | 0.001028003 | 0.00179144  | 0.485400195 |
| ARF4     | 0.018701025 | 0.074528224 | 0.485823396 |
| SBNO2    | 0.00344409  | 0.008316383 | 0.485900753 |
| UBN1     | 0.037579846 | 0.157801172 | 0.486064303 |
| MRPL28   | 0.025210433 | 0.095520054 | 0.486448293 |
| ATAD3B   | 0.022960564 | 0.218376041 | 0.486759585 |
| C1QTNF3  | 0.043128621 | 0.225200933 | 0.487267375 |
| ZFP90    | 0.018403494 | 0.116836279 | 0.487353485 |
| ATF1     | 0.173607146 | 0.028864556 | 0.487504546 |
| ZNF551   | 0.084503379 | 0.042690875 | 0.488094365 |
| TPP1     | 0.111038492 | 0.039736717 | 0.4883628   |
| NARFL    | 0.043418008 | 0.233842385 | 0.488401031 |
| G2E3     | 0.003422264 | 0.075114946 | 0.488615147 |
| MOSMO    | 0.038639125 | 0.09717276  | 0.488656215 |
| LMNB2    | 0.00417844  | 0.000416008 | 0.488847142 |
| PANK3    | 0.028625267 | 0.000789039 | 0.488887558 |
| CCDC6    | 0.070602164 | 0.011365253 | 0.489608101 |
| KIAA2026 | 0.181215957 | 0.02118208  | 0.490603886 |
| SYPL1    | 0.001693272 | 0.006815887 | 0.490876058 |
| RBM39    | 0.02099167  | 0.001493223 | 0.49092281  |
| TBCEL    | 0.240400888 | 0.035202177 | 0.490966674 |
| MED10    | 0.030120173 | 0.002733496 | 0.490984976 |
| CGGBP1   | 0.13968924  | 0.038510239 | 0.491181243 |
| GPR107   | 0.14764029  | 0.029635707 | 0.491516905 |
| SGPP1    | 0.003165519 | 0.017680939 | 0.491884084 |
| NRBP2    | 0.017357605 | 0.033869269 | 0.492429162 |
| MORN2    | 0.009478699 | 0.064198386 | 0.492529807 |
| TBC1D9B  | 0.196632611 | 0.023035379 | 0.492714945 |
| GXYLT1   | 0.062584608 | 0.003152559 | 0.493039158 |
| PGM2L1   | 0.005367257 | 0.000158456 | 0.493566906 |
| ETFB     | 0.241225678 | 0.043265718 | 0.493772312 |
| KRT18    | 0.31796393  | 0.047997403 | 0.494565693 |
| WDR83OS  | 0.037535663 | 0.108981875 | 0.494674859 |
| SURF6    | 0.001048445 | 0.012936221 | 0.494760947 |
| ASB1     | 0.011009698 | 0.023643086 | 0.495153811 |

|             |             |             |             |
|-------------|-------------|-------------|-------------|
| N4BP2       | 0.027346135 | 0.111091167 | 0.495466612 |
| TEDC1       | 0.008072781 | 0.01154908  | 0.495487294 |
| AC004687.1  | 0.094417035 | 0.032279434 | 0.497668013 |
| ETV5        | 0.118056372 | 0.049799043 | 0.497871899 |
| RMND5A      | 0.094475031 | 0.025403093 | 0.498045573 |
| NABP2       | 0.004476091 | 0.036675718 | 0.498102188 |
| LRRC8A      | 0.003072266 | 0.010723071 | 0.498694025 |
| LIN52       | 0.05375988  | 0.006603094 | 0.499233028 |
| SLC35F6     | 0.04072554  | 0.00498463  | 0.499360536 |
| SLFN12      | 0.062940628 | 0.008177015 | 0.499407246 |
| NAA15       | 0.03173876  | 0.117369605 | 0.500100654 |
| CXCL3       | 0.073014336 | 0.021674158 | 0.500115134 |
| IGF2BP2     | 0.027491217 | 0.000740847 | 0.500471729 |
| MTRF1L      | 0.002253078 | 0.000333984 | 0.500620259 |
| ZC3H12A     | 0.145869639 | 0.031583107 | 0.500696854 |
| STARD7      | 0.006468913 | 0.000430992 | 0.500748414 |
| EID2        | 0.026164001 | 0.143223744 | 0.501394281 |
| IQCE        | 0.008427614 | 0.065529621 | 0.501536259 |
| SOS2        | 0.159543284 | 0.025225574 | 0.501689161 |
| GAK         | 0.010790065 | 0.030916695 | 0.501761962 |
| TOM1        | 0.163009451 | 0.033953896 | 0.501818385 |
| TMX3        | 0.03535572  | 0.127452336 | 0.502189272 |
| CPEB4       | 0.01701184  | 0.079625959 | 0.502753701 |
| THUMPD3-AS1 | 0.013512279 | 0.001109443 | 0.502908947 |
| SLC28A3     | 0.003047218 | 0.012004716 | 0.50291136  |
| PPIL3       | 0.046635333 | 0.040087946 | 0.503103476 |
| SUMO2       | 0.013330198 | 0.035097309 | 0.503403958 |
| LGALS2      | 0.054544765 | 0.001957052 | 0.503452991 |
| COX20       | 0.025361772 | 0.105102851 | 0.503508809 |
| SON         | 0.003249351 | 0.015958338 | 0.503689634 |
| UBXN4       | 0.163753456 | 0.043239878 | 0.503981576 |
| ZFYVE1      | 0.001612612 | 0.000961891 | 0.504211067 |
| MRPS18A     | 0.087186487 | 0.02418162  | 0.50580508  |
| SEPHS1      | 0.0956391   | 0.032449025 | 0.505841903 |
| GLRX2       | 0.019613496 | 0.055890589 | 0.505996451 |
| P4HA1       | 0.015444719 | 0.025146246 | 0.506181006 |
| GATAD2B     | 0.042381033 | 0.208526838 | 0.506246907 |
| ANXA3       | 0.046489313 | 0.009438438 | 0.50626392  |
| CHMP1B      | 0.02248759  | 0.000374771 | 0.506375342 |
| CDKN2D      | 0.074452309 | 0.001735334 | 0.507136206 |
| LDHD        | 0.043641027 | 0.103274865 | 0.507782582 |
| P4HA2       | 0.032743421 | 0.005456737 | 0.507948906 |
| MT-ND2      | 0.00012684  | 0.000119979 | 0.509371082 |

|            |             |             |             |
|------------|-------------|-------------|-------------|
| KLC1       | 0.007080689 | 0.010335481 | 0.50976542  |
| CSNK1G3    | 0.080074922 | 0.015047428 | 0.510191638 |
| SETD2      | 0.033160028 | 0.008112864 | 0.510214514 |
| RPF1       | 0.007925714 | 0.013092587 | 0.510326592 |
| FBXW5      | 0.139146753 | 0.011727595 | 0.511184258 |
| SDC4       | 0.021026126 | 0.042756736 | 0.511296336 |
| UBE2F      | 0.0023175   | 0.001841643 | 0.511677302 |
| TCAF2      | 0.15467962  | 0.013194288 | 0.51185243  |
| AP5M1      | 0.173440676 | 0.015790261 | 0.512005834 |
| BRD4       | 0.027053381 | 0.002771633 | 0.512553515 |
| DONSON     | 0.044779306 | 0.318144309 | 0.512946544 |
| CARS       | 0.038702262 | 0.189129974 | 0.512985956 |
| TAF9B      | 0.016036157 | 0.059207186 | 0.513288078 |
| TTC37      | 0.040309209 | 0.095467558 | 0.513302903 |
| KBTBD12    | 0.096233562 | 0.001391846 | 0.513350248 |
| ZNF33A     | 0.025301429 | 0.142921519 | 0.513590494 |
| NUMB       | 0.051149953 | 0.006718973 | 0.514084904 |
| HSD17B12   | 0.003781558 | 0.006504736 | 0.514188145 |
| KIAA1671   | 0.002387188 | 7.80419E-05 | 0.514215441 |
| PQBP1      | 0.02507289  | 0.0884717   | 0.514395942 |
| RCHY1      | 0.032112725 | 0.007864969 | 0.514610695 |
| CXCL1      | 0.036593079 | 0.116572233 | 0.515520174 |
| BAZ2A      | 0.012805815 | 0.055102432 | 0.515796485 |
| BAMBI      | 0.004023066 | 0.006418879 | 0.515811271 |
| FBXO6      | 0.037044176 | 0.00166983  | 0.515998316 |
| BBX        | 0.001080272 | 0.004835135 | 0.516345539 |
| CUL4A      | 0.124003788 | 0.022810315 | 0.516617592 |
| TEAD3      | 0.004747915 | 0.043782348 | 0.516710759 |
| DROSHA     | 0.008269718 | 0.227800108 | 0.516963312 |
| CEP192     | 0.00981521  | 0.072817823 | 0.517197336 |
| MINK1      | 0.021256632 | 0.075876943 | 0.517274311 |
| SDHD       | 0.100814619 | 0.021174746 | 0.517288735 |
| DCUN1D1    | 0.018560168 | 0.002149138 | 0.517633716 |
| SESTD1     | 0.161228114 | 0.032868559 | 0.518800167 |
| RNF185     | 0.111518547 | 0.028131964 | 0.5194727   |
| KCNE3      | 0.050244573 | 0.01533594  | 0.520063055 |
| MARCH8     | 0.027189808 | 0.009605626 | 0.520186602 |
| CENPS      | 0.027998964 | 0.062302687 | 0.520449153 |
| GABARAPL1  | 0.00259773  | 0.00217552  | 0.520671927 |
| NMRK1      | 0.039665924 | 0.26287562  | 0.521156314 |
| NDUFAF1    | 0.003463602 | 0.01532787  | 0.52212993  |
| AC097376.2 | 0.031991325 | 0.007690118 | 0.522168134 |
| DTNB       | 0.040002422 | 0.012819984 | 0.522732137 |

|           |             |             |             |
|-----------|-------------|-------------|-------------|
| LINC02542 | 0.114374563 | 0.031740348 | 0.522795534 |
| APOO      | 0.01404828  | 0.113725631 | 0.523070397 |
| NDUFA12   | 0.064885196 | 0.003531301 | 0.523148024 |
| GK5       | 0.001624696 | 0.091110322 | 0.523510877 |
| NDUFAF6   | 0.007088641 | 0.10937072  | 0.523526271 |
| CHERP     | 0.024525216 | 0.009157496 | 0.523608267 |
| SAMD9     | 0.001241525 | 0.001397517 | 0.524073064 |
| BRI3      | 0.177979161 | 0.02926579  | 0.524142723 |
| WDR78     | 0.047132829 | 0.245184057 | 0.524236495 |
| DDX55     | 0.044032666 | 0.121739077 | 0.524341241 |
| ZNF720    | 0.023513806 | 0.018376996 | 0.524523532 |
| CAPN2     | 0.045571639 | 0.125798238 | 0.52458484  |
| TMEM33    | 0.088594236 | 0.020528213 | 0.524815511 |
| PHF11     | 0.001152181 | 0.001253532 | 0.524903431 |
| BSG       | 0.000967357 | 8.56199E-05 | 0.52515684  |
| EXOC3L1   | 0.131415135 | 0.034454209 | 0.525284674 |
| ALS2      | 0.059044548 | 0.032364453 | 0.525629724 |
| ZNFX1     | 0.002570591 | 2.94006E-05 | 0.525639556 |
| CHML      | 0.032869876 | 0.147737931 | 0.526427608 |
| PLXNA1    | 0.016223911 | 0.041071458 | 0.526437684 |
| RBM48     | 0.046923769 | 0.185381099 | 0.526505384 |
| MAN1A1    | 0.027340308 | 0.047802782 | 0.526558789 |
| JPT1      | 0.002081505 | 0.001723042 | 0.526676634 |
| MADD      | 0.103108342 | 0.029309572 | 0.526793318 |
| UMAD1     | 0.094975304 | 0.024012656 | 0.527006739 |
| TRIP4     | 0.003059016 | 0.010842457 | 0.527135753 |
| KDM6B     | 0.013954596 | 0.008208523 | 0.527143271 |
| YAP1      | 0.013748362 | 0.021039514 | 0.527558117 |
| EIF3E     | 0.028834119 | 0.146067105 | 0.528427254 |
| ACTG1     | 0.062518199 | 0.001187843 | 0.528785003 |
| AGFG1     | 0.001065054 | 3.96753E-05 | 0.528860045 |
| CD5       | 0.04514383  | 0.139179459 | 0.528900637 |
| STYXL1    | 0.055368331 | 0.03148973  | 0.529496821 |
| ST3GAL2   | 0.007681723 | 0.039745075 | 0.53004096  |
| MVP       | 0.04090525  | 0.008806004 | 0.53075635  |
| DOCK5     | 0.180290931 | 0.044788407 | 0.531172989 |
| RWDD2A    | 0.024760092 | 0.086178524 | 0.531747577 |
| PCNT      | 0.179774212 | 0.042261677 | 0.53181147  |
| FOXK2     | 0.008378057 | 0.016261441 | 0.532300132 |
| SREBF2    | 0.007932349 | 0.014674248 | 0.532603776 |
| RSF1      | 0.098375497 | 0.033392707 | 0.532884391 |
| BUB3      | 0.042614136 | 0.142293975 | 0.533564229 |
| KDF1      | 0.125162874 | 0.024287026 | 0.534057755 |

|            |             |             |             |
|------------|-------------|-------------|-------------|
| ARNTL2     | 5.76331E-05 | 0.000112503 | 0.534219857 |
| EIF4B      | 0.015716276 | 0.049944495 | 0.534275033 |
| KPNA6      | 0.005917524 | 0.067440854 | 0.534494691 |
| ZNF713     | 0.041209261 | 0.095079336 | 0.534565216 |
| MX1        | 0.023905375 | 0.002932124 | 0.535153113 |
| DTX3L      | 0.034938934 | 0.083631726 | 0.535796916 |
| PPP1R11    | 0.000144878 | 0.001091722 | 0.536644497 |
| CTNNA1     | 0.011223876 | 0.000706052 | 0.536704682 |
| LETMD1     | 0.054633755 | 0.022604119 | 0.537301482 |
| MED27      | 0.024867544 | 0.150569319 | 0.537832053 |
| MAP3K7     | 0.067253817 | 0.023769857 | 0.538733181 |
| AKIRIN1    | 0.097659806 | 0.022524733 | 0.538745925 |
| HES1       | 0.096391662 | 0.025098157 | 0.539385896 |
| SLC24A1    | 0.10410533  | 0.03940902  | 0.539790914 |
| EIF4A2     | 0.01326121  | 0.006070822 | 0.540024306 |
| FAM89A     | 0.250533123 | 0.04086933  | 0.540463853 |
| PRCC       | 0.044653211 | 0.182079066 | 0.540632255 |
| EMC2       | 0.034785905 | 0.005747824 | 0.540658722 |
| GORASP2    | 0.033371436 | 0.003876965 | 0.54115475  |
| LBX2-AS1   | 0.065931755 | 0.029920081 | 0.541551119 |
| EIF6       | 0.00157075  | 0.002640922 | 0.541916707 |
| CTTN       | 0.013002844 | 0.004838352 | 0.542001834 |
| SC5D       | 0.042053304 | 0.133636062 | 0.542665724 |
| PPIC       | 0.024761197 | 0.052191867 | 0.543646659 |
| ABCG1      | 0.120668934 | 0.027183026 | 0.544046064 |
| FPGS       | 0.011047002 | 0.038397307 | 0.544120764 |
| ATP11A     | 0.005802509 | 0.000582499 | 0.544164391 |
| FAM118B    | 0.016711281 | 0.058122434 | 0.544175446 |
| FBXL15     | 0.002199688 | 0.025560744 | 0.54433057  |
| SLC16A3    | 0.00010143  | 0.000175653 | 0.544571499 |
| CASP8AP2   | 0.036011406 | 0.14375509  | 0.544832572 |
| RIN2       | 0.052087995 | 0.007781472 | 0.545099565 |
| SH2B3      | 0.037650172 | 0.001559918 | 0.546009763 |
| ARPC5L     | 0.01137425  | 0.042468954 | 0.546102977 |
| KLHL22     | 0.041842785 | 0.141642426 | 0.546161621 |
| SERF2      | 0.05768191  | 0.005581503 | 0.546179255 |
| AL050403.2 | 0.017905965 | 0.083313401 | 0.546260226 |
| CACNB3     | 0.023550056 | 0.095980418 | 0.546431449 |
| C16orf72   | 0.059019649 | 0.017184425 | 0.54645192  |
| FNDC3A     | 0.002727533 | 0.000832813 | 0.546514098 |
| KIAA0319L  | 0.003819215 | 0.015543302 | 0.546535734 |
| HSPA4      | 0.017245668 | 0.065059512 | 0.546554105 |
| IGFBP4     | 0.015672721 | 0.03166251  | 0.546701521 |

|          |             |             |             |
|----------|-------------|-------------|-------------|
| NFU1     | 0.01133468  | 0.003529507 | 0.546738049 |
| CYP2J2   | 0.091177311 | 0.030078647 | 0.546769815 |
| H3F3B    | 0.006824018 | 0.000273057 | 0.54690895  |
| OSTF1    | 0.001370644 | 0.019325903 | 0.547371599 |
| RSAD2    | 0.119966174 | 0.003161345 | 0.547455283 |
| ORAI1    | 0.090070968 | 0.01089734  | 0.547462596 |
| ODC1     | 0.11609986  | 0.021948567 | 0.548236986 |
| YARS2    | 0.189686664 | 0.044761509 | 0.548240302 |
| GOLT1B   | 0.015643818 | 0.078013476 | 0.5488951   |
| ATG4A    | 0.031504964 | 0.01019134  | 0.549647233 |
| ZC3H14   | 0.015134557 | 0.014801966 | 0.549713571 |
| TNFRSF1A | 0.08260391  | 0.019569471 | 0.549766766 |
| SMARCA5  | 0.260549382 | 0.043324459 | 0.550521904 |
| XYLT2    | 0.054718094 | 0.009222872 | 0.551196993 |
| TMEM222  | 0.005635267 | 0.048893001 | 0.551250595 |
| TMEM173  | 0.132457585 | 0.025802309 | 0.5519839   |
| GLG1     | 0.023818579 | 0.005469783 | 0.552133467 |
| CDYL     | 0.123949376 | 0.023222268 | 0.552242083 |
| OPTN     | 0.012668441 | 0.001867543 | 0.552289525 |
| UBE2B    | 0.003231585 | 2.22754E-05 | 0.552466365 |
| TCHP     | 0.101898892 | 0.031405486 | 0.552720308 |
| NDUFAB1  | 0.054138651 | 0.005962719 | 0.55280946  |
| DGKE     | 0.002969959 | 0.022905511 | 0.552832499 |
| ADAM15   | 0.070590258 | 0.022187727 | 0.553473964 |
| UBE2J2   | 0.072324279 | 0.023197472 | 0.553683883 |
| TNKS     | 0.018203339 | 0.017685332 | 0.55371453  |
| CEACAM1  | 0.001626342 | 0.001013954 | 0.553726159 |
| PRKRA    | 0.013364046 | 0.115972988 | 0.5537923   |
| AIMP1    | 0.011377864 | 0.029553205 | 0.553975936 |
| CHD4     | 0.009244879 | 0.045521761 | 0.554291915 |
| KLF11    | 0.062230753 | 0.012010532 | 0.554333013 |
| NT5C     | 0.047764794 | 0.140641056 | 0.555167619 |
| RNPS1    | 0.025258081 | 0.002732099 | 0.555275653 |
| EP300    | 0.024340083 | 0.007279403 | 0.555337132 |
| CORO1B   | 0.008356998 | 0.045881417 | 0.555627395 |
| HELZ2    | 0.07712232  | 0.013420732 | 0.556589179 |
| CDK11B   | 0.025253314 | 0.091088053 | 0.556693856 |
| DHRS3    | 0.019966039 | 0.074088664 | 0.557352875 |
| BAG3     | 0.069313892 | 0.008676067 | 0.55761481  |
| SEC63    | 0.045167542 | 0.231349729 | 0.557798722 |
| COPG1    | 0.024820788 | 0.0923731   | 0.558814201 |
| FAM129B  | 0.000450493 | 0.002698027 | 0.559492155 |
| SMAD6    | 0.043572922 | 0.241335602 | 0.559856072 |

|            |             |             |             |
|------------|-------------|-------------|-------------|
| HIPK3      | 0.162698854 | 0.049912895 | 0.559917524 |
| TRIB2      | 0.008851231 | 0.014416011 | 0.560073793 |
| TMED5      | 0.118770235 | 0.0081329   | 0.560268664 |
| GLCE       | 0.071825344 | 0.024039489 | 0.560354269 |
| HGSNAT     | 0.007348252 | 0.087372782 | 0.561314428 |
| HSBP1      | 0.005255683 | 0.000376418 | 0.561372796 |
| TP53RK     | 0.037273187 | 0.065745845 | 0.561438268 |
| NXN        | 0.041625307 | 0.039550642 | 0.561773909 |
| ADNP2      | 0.001557949 | 0.00236556  | 0.561800226 |
| SP110      | 0.00279649  | 0.024547742 | 0.561961482 |
| VTA1       | 0.001236907 | 0.002392891 | 0.562182837 |
| RFX7       | 0.073942893 | 0.011084449 | 0.562231061 |
| SLC7A6     | 0.046745916 | 0.225200933 | 0.562395619 |
| GPX3       | 0.019795089 | 0.162050169 | 0.562542753 |
| FPGT       | 0.068940746 | 0.002966909 | 0.562724927 |
| BBC3       | 0.006330417 | 1.93249E-05 | 0.563116796 |
| SART1      | 0.160046373 | 0.043792273 | 0.563780913 |
| YWHAE      | 0.03687113  | 0.087072778 | 0.563839472 |
| MAML3      | 0.014143238 | 0.0065947   | 0.56398486  |
| DMAP1      | 0.005849365 | 0.033170365 | 0.564295201 |
| FAM83B     | 0.009097041 | 0.086338469 | 0.5645498   |
| ATF4       | 0.004057001 | 0.016947218 | 0.564553156 |
| ELK3       | 0.021118856 | 0.044012695 | 0.564715895 |
| C11orf68   | 0.028179975 | 0.172064188 | 0.564743309 |
| CRKL       | 0.047928137 | 0.020322609 | 0.565231975 |
| ZMAT5      | 0.049750029 | 0.084242178 | 0.565499804 |
| ICAM4      | 0.124218546 | 0.033126698 | 0.565642209 |
| STK3       | 0.092322847 | 0.034199838 | 0.566242987 |
| TAX1BP1    | 0.067287307 | 0.00996347  | 0.566450715 |
| ZFYVE27    | 0.072492973 | 0.035761067 | 0.566469516 |
| PRR14      | 0.030948387 | 0.132331394 | 0.567230593 |
| MSX1       | 0.092690903 | 0.032962728 | 0.567257204 |
| PIGBOS1    | 0.014585357 | 0.018303918 | 0.567650177 |
| SLC12A4    | 0.019220047 | 0.08382173  | 0.567832281 |
| USP6NL     | 0.051331696 | 0.002546583 | 0.567900686 |
| PLEC       | 0.003264476 | 0.000117715 | 0.568272304 |
| SDHA       | 0.008594862 | 0.001534657 | 0.568330313 |
| KDM7A      | 0.034324282 | 0.156338433 | 0.568790456 |
| H2AFY      | 0.01329637  | 0.036734202 | 0.56893687  |
| PSMB7      | 0.005011945 | 0.015086735 | 0.569334976 |
| AC106791.1 | 0.044621377 | 0.090311952 | 0.569542136 |
| PGAM5      | 0.139602517 | 0.039314192 | 0.569920025 |
| BCKDK      | 0.014450194 | 0.024844116 | 0.570234899 |

|            |             |             |             |
|------------|-------------|-------------|-------------|
| SLC6A6     | 0.118379474 | 0.013606134 | 0.57058221  |
| C11orf58   | 0.047347627 | 0.010541225 | 0.570838354 |
| PINK1      | 0.06945527  | 0.023190116 | 0.571446468 |
| RINT1      | 0.011763988 | 0.071800542 | 0.571693573 |
| TCOF1      | 0.129756253 | 0.047234983 | 0.572117427 |
| TCEA1      | 0.135629269 | 0.026498579 | 0.572273576 |
| PRPF3      | 0.024347661 | 0.008722031 | 0.572359398 |
| FAM78A     | 0.040044718 | 0.147607805 | 0.572524218 |
| ZNF276     | 0.037131735 | 0.210647945 | 0.572543139 |
| SCAP       | 0.079811715 | 0.018783675 | 0.572674649 |
| SETD1A     | 0.142704743 | 0.043153891 | 0.572883934 |
| COX19      | 0.011152162 | 0.002303625 | 0.573459089 |
| STK24      | 0.002382554 | 0.000356629 | 0.573742336 |
| IRF2BP2    | 0.115877407 | 0.03825332  | 0.573915699 |
| USP45      | 0.019963975 | 0.035512775 | 0.574389396 |
| ZNF614     | 0.111434308 | 0.014610826 | 0.574442852 |
| SPPL3      | 0.024084521 | 0.00630969  | 0.575867791 |
| ANKIB1     | 0.128845075 | 0.02929774  | 0.576065074 |
| MRPL36     | 0.035000195 | 0.015254819 | 0.576260503 |
| ISCA2      | 0.000603823 | 0.000985989 | 0.576321489 |
| GLYR1      | 0.044595062 | 0.047438304 | 0.57637778  |
| TMEM63A    | 0.003756908 | 0.005175858 | 0.576866467 |
| SEMA3B     | 0.158537876 | 0.022204031 | 0.577101227 |
| COX5B      | 0.020827649 | 0.049475509 | 0.577406166 |
| HEXIM1     | 0.064885407 | 0.012677007 | 0.577484794 |
| BMPR2      | 0.000959528 | 9.83581E-06 | 0.577580462 |
| HSPA13     | 0.008165435 | 0.022969482 | 0.577658612 |
| GORASP1    | 0.02145738  | 0.0516756   | 0.578127402 |
| SYVN1      | 0.033540009 | 0.141176758 | 0.578323866 |
| CARD10     | 0.081670526 | 0.014216309 | 0.579251391 |
| HMGN1      | 0.013515693 | 0.035098107 | 0.580391356 |
| AC114760.2 | 0.043336949 | 0.225200933 | 0.580476219 |
| HNRNPR     | 0.049980592 | 0.181695977 | 0.581199405 |
| MAN2B1     | 0.094734144 | 0.033499504 | 0.581542409 |
| RNF220     | 0.109339813 | 0.026532272 | 0.581662375 |
| SLF2       | 0.032615822 | 0.006141173 | 0.582443244 |
| HERPUD2    | 0.033131762 | 0.007626381 | 0.582942345 |
| MUC4       | 0.013140036 | 0.002616111 | 0.583420537 |
| BRMS1      | 0.038587135 | 0.095634568 | 0.583428344 |
| TBC1D32    | 0.007593145 | 0.072838478 | 0.584022227 |
| RBM4       | 0.004569998 | 0.01293217  | 0.584328263 |
| RANGAP1    | 0.015104128 | 0.039937712 | 0.584384601 |
| PET117     | 0.090264327 | 0.017861328 | 0.584386488 |



|            |             |             |             |
|------------|-------------|-------------|-------------|
| KDM3A      | 0.01592187  | 0.026613566 | 0.584993767 |
| NUDCD3     | 0.008402662 | 0.015572518 | 0.585073632 |
| LAMC2      | 0.024582195 | 0.045063087 | 0.585211161 |
| LYPD6      | 0.012585556 | 0.043434173 | 0.586068736 |
| METTTL23   | 0.032493488 | 0.112856816 | 0.586129105 |
| RITA1      | 0.060739525 | 0.007490142 | 0.586495786 |
| NKIRAS2    | 0.000102809 | 0.00270426  | 0.586843845 |
| NDUFS1     | 0.089184433 | 0.04200784  | 0.587107184 |
| PODXL      | 0.148742984 | 0.036800296 | 0.587209978 |
| FAR2       | 0.036035721 | 0.015424567 | 0.587263    |
| ANKS1A     | 0.000105384 | 0.001962432 | 0.58733889  |
| RND1       | 0.045571008 | 0.101924019 | 0.587466276 |
| MOB3C      | 0.241831743 | 0.034253967 | 0.588614281 |
| TOMM5      | 0.048557551 | 0.149267527 | 0.588929839 |
| CDK5       | 0.182290294 | 0.033507569 | 0.589116447 |
| GRAMD1B    | 0.003785923 | 0.000360843 | 0.589354476 |
| C3orf38    | 0.039241046 | 0.002806047 | 0.589371633 |
| EML4       | 0.05064475  | 0.001464415 | 0.589432649 |
| PEX19      | 0.029618059 | 0.010236295 | 0.590434068 |
| TRIO       | 3.33818E-05 | 9.5582E-05  | 0.590959526 |
| SRRM1      | 0.033951053 | 0.023655259 | 0.591312316 |
| FAM207A    | 0.05598276  | 0.014815898 | 0.591429559 |
| SF1        | 0.012267035 | 0.056357318 | 0.591655884 |
| AP001160.3 | 0.169676744 | 0.033452791 | 0.591687715 |
| CUL3       | 0.004315842 | 0.000978702 | 0.591973718 |
| KRT10      | 0.0126274   | 0.039388123 | 0.592125025 |
| FAM84B     | 0.285444424 | 0.03072349  | 0.592896724 |
| TYMP       | 0.012538029 | 0.029351481 | 0.593266097 |
| PAIP1      | 0.060295144 | 0.031374928 | 0.593543193 |
| APLP2      | 0.021290504 | 0.000203264 | 0.593836678 |
| MIR22HG    | 0.018108912 | 0.006678069 | 0.593891107 |
| TMC8       | 0.018266622 | 0.048198115 | 0.594382696 |
| P4HB       | 0.005936615 | 0.033274176 | 0.594423642 |
| SEC31A     | 0.031371926 | 0.168092091 | 0.594480527 |
| SHC1       | 0.035649348 | 0.002391661 | 0.594504726 |
| C1orf52    | 0.008918677 | 0.065036608 | 0.594968163 |
| BAP1       | 0.001585369 | 0.000529369 | 0.5954095   |
| ARL14      | 0.086981693 | 0.040729887 | 0.595651081 |
| TGIF1      | 0.046337665 | 0.00928952  | 0.59639823  |
| UBL4A      | 0.069383825 | 0.019825965 | 0.596598839 |
| NUDT9      | 0.023316124 | 0.01200109  | 0.596832663 |
| LGALS3BP   | 0.033715533 | 0.002811217 | 0.596936408 |
| CD63       | 0.025830252 | 0.003285907 | 0.596990444 |

|          |             |             |             |
|----------|-------------|-------------|-------------|
| JARID2   | 0.014806729 | 0.163945445 | 0.597875914 |
| CHMP4C   | 0.12981065  | 0.025782384 | 0.597985143 |
| INAVA    | 0.004433521 | 0.000154829 | 0.598621683 |
| PRF1     | 0.044965052 | 0.26087726  | 0.598659692 |
| NCOA3    | 0.029306742 | 0.048825261 | 0.599969423 |
| PDE4DIP  | 0.018040204 | 0.054298107 | 0.600103328 |
| PPP1R35  | 0.001876883 | 0.007288024 | 0.60020925  |
| NCOA2    | 0.069428238 | 0.016597064 | 0.601011507 |
| BTRC     | 0.01755169  | 0.01338603  | 0.601038363 |
| RBM7     | 0.030237944 | 0.002392908 | 0.601432386 |
| PHB      | 0.035398074 | 0.009065861 | 0.601807488 |
| NAE1     | 0.003648126 | 0.06430376  | 0.601822396 |
| TRPV2    | 0.010753375 | 0.014630831 | 0.602090322 |
| MPHOSPH8 | 0.040470219 | 0.142476487 | 0.602507074 |
| WTAP     | 0.015017344 | 0.003972364 | 0.603010361 |
| PTHLH    | 0.04077935  | 0.087110928 | 0.603750366 |
| CDADC1   | 0.032696752 | 0.088548903 | 0.604285632 |
| LTBP4    | 0.04186043  | 0.158271447 | 0.60448862  |
| TMEM167B | 0.017977396 | 0.121329273 | 0.604547675 |
| HNRNPF   | 0.003093483 | 0.014181878 | 0.604706205 |
| SEPT11   | 0.072375268 | 0.013305743 | 0.604732141 |
| RSRC1    | 0.000147541 | 0.073129363 | 0.604815738 |
| VPS8     | 0.075807353 | 0.014166269 | 0.604843707 |
| GPAA1    | 0.011591805 | 0.004665581 | 0.604917399 |
| S100A16  | 0.111148857 | 0.007277072 | 0.605175378 |
| RFWD3    | 0.025710818 | 0.02425654  | 0.605574727 |
| SARAF    | 0.051498543 | 0.005405209 | 0.605620939 |
| ADAM28   | 0.028537835 | 0.081429214 | 0.605652418 |
| FBRSL1   | 0.002225815 | 0.014469801 | 0.605816553 |
| SRD5A3   | 0.030803944 | 0.087152342 | 0.606316618 |
| MYO9B    | 0.022769249 | 0.046359542 | 0.606429357 |
| NPC1     | 0.119943432 | 0.049570731 | 0.606595831 |
| ZNF775   | 0.038225431 | 0.088890491 | 0.606953904 |
| PNRC1    | 0.006077772 | 0.008392043 | 0.608297656 |
| DNAJB2   | 0.096583482 | 0.048082413 | 0.608310457 |
| PTP4A2   | 0.001547334 | 0.001777204 | 0.609241148 |
| GGNBP2   | 0.037022408 | 0.007784181 | 0.609586841 |
| NUP85    | 0.111602771 | 0.021663824 | 0.609798848 |
| RNF6     | 0.006676577 | 0.005656091 | 0.610741236 |
| SPRY2    | 0.024030862 | 0.006588057 | 0.611719872 |
| FBRS     | 0.02411955  | 0.007611372 | 0.611927791 |
| C6orf62  | 0.002846205 | 0.009751139 | 0.612056788 |
| TMEM63B  | 0.118037221 | 0.019066087 | 0.612430416 |

|            |             |             |             |
|------------|-------------|-------------|-------------|
| FAM111A    | 0.049843994 | 0.070585297 | 0.612512429 |
| FAM120AOS  | 0.149451615 | 0.027062614 | 0.61252949  |
| RHEB       | 0.005489463 | 0.005408921 | 0.612814605 |
| SMAD7      | 0.076182472 | 0.04710897  | 0.613067499 |
| LMAN2      | 0.084051564 | 0.018886989 | 0.61324768  |
| ING2       | 0.077089477 | 0.025120658 | 0.613272806 |
| DGCR6      | 0.126976185 | 0.033570158 | 0.61333654  |
| RBM23      | 0.002895209 | 0.005674312 | 0.613800608 |
| RP2        | 0.034510549 | 0.047411928 | 0.615055882 |
| KRAS       | 0.012214357 | 0.002245114 | 0.615311682 |
| DNAAF4     | 0.103004317 | 0.019149807 | 0.61559372  |
| NECAP2     | 0.041832927 | 0.008949663 | 0.615627525 |
| C19orf66   | 0.083976739 | 0.022133685 | 0.616790907 |
| GNL1       | 0.004995435 | 0.040832084 | 0.617067839 |
| PRKAG1     | 0.007381598 | 0.012701268 | 0.617105259 |
| SPAG9      | 0.126034546 | 0.02413583  | 0.617827261 |
| NUP93      | 0.004303855 | 0.010905563 | 0.61847747  |
| AL355312.4 | 0.060422924 | 0.014815441 | 0.618677111 |
| PTPRH      | 0.117703666 | 0.032412988 | 0.618742569 |
| ATP6V0B    | 0.01457343  | 0.02112261  | 0.619650794 |
| CARHSP1    | 0.006929162 | 0.013521138 | 0.620111654 |
| NFKBIB     | 0.009861497 | 0.031143371 | 0.620366056 |
| UBE2Z      | 0.127927464 | 0.038813648 | 0.620801371 |
| ALG6       | 0.104234803 | 0.031786948 | 0.621810682 |
| ASB7       | 0.221041262 | 0.047907743 | 0.621877623 |
| MECOM      | 0.025881043 | 0.002873074 | 0.621936137 |
| TTLL12     | 0.125463471 | 0.038843611 | 0.622782043 |
| XRCC4      | 0.004960284 | 0.001390706 | 0.622786582 |
| CCM2       | 0.000586366 | 0.000599344 | 0.623227304 |
| CYLD       | 0.148055685 | 0.033341581 | 0.623744065 |
| C5orf63    | 0.03310401  | 0.088651911 | 0.623971612 |
| IRF7       | 0.00020596  | 0.002018704 | 0.624396187 |
| FEM1B      | 0.003709477 | 1.24791E-06 | 0.624587348 |
| RNF14      | 0.039251408 | 0.041945138 | 0.624737104 |
| SMARCD2    | 0.009005771 | 0.006922918 | 0.62479671  |
| TXN        | 0.047395108 | 0.262286921 | 0.62479887  |
| SLFN11     | 0.027584651 | 0.15129284  | 0.624898886 |
| C1orf43    | 0.111648097 | 0.026422174 | 0.625485997 |
| PTPRE      | 0.089815863 | 0.022377044 | 0.625543647 |
| DPH3       | 0.014061616 | 0.00301319  | 0.625830228 |
| PTOV1      | 0.008419275 | 0.034556959 | 0.625860767 |
| TSPAN5     | 0.004710974 | 0.011669839 | 0.626129053 |
| RHBDL1     | 0.041031821 | 0.225200933 | 0.626419809 |

|            |             |             |             |
|------------|-------------|-------------|-------------|
| TSPAN15    | 0.002663917 | 0.001335281 | 0.626662929 |
| VKORC1L1   | 0.10371179  | 0.042915173 | 0.626785169 |
| FKBP14     | 0.01362183  | 0.092763061 | 0.627626342 |
| NDUFS2     | 0.00809596  | 0.001589624 | 0.627732431 |
| PTK2       | 0.001384314 | 0.000100177 | 0.627766163 |
| CNP        | 0.008408636 | 0.000252934 | 0.628036742 |
| RAPH1      | 0.031297575 | 0.005276382 | 0.628201624 |
| NAAA       | 0.00537865  | 0.028036576 | 0.628302234 |
| CARM1      | 0.007270586 | 0.038785424 | 0.628385551 |
| ARF1       | 0.014232985 | 0.002877459 | 0.629057253 |
| MTMR11     | 0.003362171 | 0.015540868 | 0.629150101 |
| AGRN       | 0.003188231 | 0.006607855 | 0.629213766 |
| NUDC       | 0.015915721 | 0.077492108 | 0.629663717 |
| AMFR       | 0.031645847 | 0.005066019 | 0.629825881 |
| ECE1       | 0.015405289 | 0.080393425 | 0.629906967 |
| ZNF865     | 0.023841586 | 0.094311169 | 0.630094617 |
| LYSMD2     | 0.009379708 | 0.080260493 | 0.630233338 |
| SPHK1      | 0.084868371 | 0.006046951 | 0.630695596 |
| DNAJA1     | 0.050879737 | 0.018313849 | 0.630948045 |
| TRAM1      | 0.067647136 | 0.019058572 | 0.631367342 |
| PLA2G6     | 0.091735486 | 0.0309952   | 0.631427436 |
| TRIB1      | 0.024766012 | 0.085327895 | 0.631555647 |
| CNBP       | 0.080287224 | 0.02124647  | 0.631944774 |
| GLMN       | 0.029306513 | 0.089874427 | 0.632250823 |
| WNK1       | 0.047519979 | 0.004257096 | 0.632569678 |
| ING3       | 0.107512774 | 0.048869006 | 0.632892799 |
| BRD9       | 0.014983277 | 0.081756121 | 0.633237927 |
| ERBB2      | 0.043588364 | 0.021110327 | 0.633326806 |
| SEPHS2     | 0.000505538 | 0.000120709 | 0.6334036   |
| MMP14      | 0.063680217 | 0.018641258 | 0.634004174 |
| M6PR       | 0.01582252  | 0.053468002 | 0.634231231 |
| RPUSD1     | 0.057619134 | 0.016222845 | 0.634522482 |
| SF3B4      | 0.005669971 | 0.000407959 | 0.634544521 |
| AL049597.2 | 0.044278115 | 0.034586878 | 0.635183351 |
| NAIP       | 0.071873896 | 0.01024525  | 0.635307331 |
| ARL4A      | 0.023449839 | 0.030800324 | 0.635414784 |
| CHP1       | 0.039737766 | 0.012732667 | 0.636049249 |
| GAREM1     | 0.095646863 | 0.014061287 | 0.636104156 |
| TCTN2      | 0.020951204 | 0.043206628 | 0.636314501 |
| CNDP2      | 0.039618969 | 0.065650006 | 0.636317398 |
| TXNIP      | 0.002308402 | 0.01337183  | 0.63721427  |
| ZNF777     | 0.0463542   | 0.073416342 | 0.637981973 |
| HIPK1      | 0.005635697 | 0.003862163 | 0.638253098 |

|            |             |             |             |
|------------|-------------|-------------|-------------|
| MT-ND4L    | 0.002055799 | 0.004030212 | 0.638559047 |
| ARMC7      | 0.035849174 | 0.141325507 | 0.638932114 |
| CAPZA1     | 0.009368563 | 0.00521333  | 0.639385453 |
| C9orf72    | 0.02075427  | 0.063784147 | 0.639645752 |
| ARMC6      | 0.009581582 | 0.033449351 | 0.63981303  |
| PKD1       | 0.040379203 | 0.085220404 | 0.64023132  |
| ATAD1      | 0.059731439 | 0.00789094  | 0.640289887 |
| LPCAT3     | 0.046788414 | 0.024362555 | 0.640525748 |
| KIF13B     | 0.065527869 | 0.013064656 | 0.640654501 |
| GOLGA7     | 0.009591326 | 0.031162736 | 0.641003459 |
| OXL1       | 0.04855431  | 0.196338956 | 0.641205244 |
| NDUFB5     | 0.006405053 | 0.007087602 | 0.641343749 |
| CCL20      | 0.116362279 | 0.015203543 | 0.641721444 |
| XRN2       | 0.000276121 | 2.94298E-06 | 0.641883104 |
| OSGIN2     | 0.038491888 | 0.080967835 | 0.642242927 |
| ENOX2      | 0.115416631 | 0.033942246 | 0.642243575 |
| SQSTM1     | 0.011140295 | 0.005078409 | 0.642638256 |
| C12orf75   | 0.133374904 | 0.024554847 | 0.642652373 |
| SLC6A14    | 0.006370912 | 0.000396733 | 0.643558796 |
| GON4L      | 0.101625732 | 0.032557926 | 0.643597735 |
| TYROBP     | 0.070423327 | 0.04325956  | 0.643629026 |
| FAM214B    | 0.045397668 | 0.125931787 | 0.644248161 |
| AC080037.1 | 0.092804213 | 0.005904424 | 0.644480929 |
| PATJ       | 0.074026778 | 0.01218074  | 0.644734787 |
| ODF2L      | 0.036858645 | 0.014501156 | 0.644820124 |
| MBTPS1     | 0.0376633   | 0.089853203 | 0.645079291 |
| PFDN2      | 0.003786192 | 0.006616191 | 0.645208164 |
| PTK6       | 0.144682316 | 0.042058343 | 0.645708578 |
| SELENOK    | 0.021727288 | 0.054872351 | 0.646477091 |
| SNX5       | 0.041385338 | 0.125351481 | 0.646494799 |
| CDC42SE1   | 0.006923595 | 0.01504813  | 0.646541023 |
| NT5C2      | 0.024036864 | 0.01064754  | 0.646575557 |
| TRIP10     | 0.009816883 | 0.026396757 | 0.646699564 |
| MLPH       | 0.03489655  | 0.005670111 | 0.646927085 |
| PRR12      | 0.011180514 | 0.004572862 | 0.647069125 |
| WDR33      | 0.003023851 | 0.002750398 | 0.647097903 |
| GIGYF2     | 0.004200633 | 0.018098834 | 0.647458893 |
| RFK        | 0.001157285 | 8.18015E-05 | 0.647796967 |
| LMNA       | 0.007306248 | 0.001446671 | 0.64780265  |
| OGA        | 0.000798775 | 0.000807396 | 0.64804854  |
| CANX       | 0.021946872 | 0.057947005 | 0.648406252 |
| CMPK2      | 0.035951221 | 0.035121832 | 0.648840049 |
| RER1       | 0.074337414 | 0.019394643 | 0.649572254 |

|            |             |             |             |
|------------|-------------|-------------|-------------|
| ASB6       | 0.002495703 | 0.003051935 | 0.649595627 |
| RBM4B      | 0.024046775 | 0.006522351 | 0.649715138 |
| MTERF3     | 0.046842676 | 0.08294518  | 0.650221606 |
| RAB40C     | 0.006982477 | 0.000357382 | 0.6503623   |
| PTBP1      | 0.000961336 | 0.000116498 | 0.6505836   |
| SESN1      | 0.048934653 | 0.095079336 | 0.650726394 |
| INF2       | 0.079205377 | 0.027877509 | 0.650728509 |
| GATD1      | 0.045741207 | 0.147288121 | 0.651043376 |
| RDH13      | 0.164044133 | 0.043837525 | 0.651080322 |
| SUPT6H     | 0.065623848 | 0.048247346 | 0.651179224 |
| TMEM218    | 0.027026006 | 0.048737234 | 0.651320816 |
| SKP1       | 0.044256432 | 0.002060381 | 0.65187324  |
| NRIP1      | 0.004671003 | 0.004550554 | 0.652093829 |
| ATP5ME     | 0.042861078 | 0.063407006 | 0.652219302 |
| ZNF358     | 0.025863472 | 0.147734773 | 0.654050927 |
| MALAT1     | 0.025091595 | 0.062076018 | 0.654866555 |
| ZNF148     | 0.083802821 | 0.037177102 | 0.655075497 |
| FOXN3      | 0.007836806 | 0.05083759  | 0.65528376  |
| HGS        | 0.031774557 | 0.052753068 | 0.655372119 |
| ATG101     | 0.030433229 | 0.003340923 | 0.656005498 |
| SLC38A2    | 0.031387592 | 0.044883354 | 0.656353618 |
| PHC3       | 0.161048843 | 0.042839498 | 0.657009223 |
| EIF5       | 0.007195844 | 0.004853521 | 0.657329027 |
| SMAD3      | 0.000214431 | 0.000525497 | 0.657613456 |
| CSGALNACT1 | 0.068372562 | 0.037228159 | 0.658460806 |
| AMN1       | 0.009541702 | 0.024522499 | 0.658750807 |
| TBRG1      | 0.002263614 | 0.018620056 | 0.658965183 |
| RGS12      | 0.061240039 | 0.011760153 | 0.659064949 |
| IER3IP1    | 0.028658499 | 0.01016708  | 0.659335687 |
| EXO3-AS1   | 0.023096462 | 0.014526264 | 0.659662741 |
| BARD1      | 0.004651899 | 0.013622175 | 0.659744606 |
| APMAP      | 0.05749567  | 0.039885346 | 0.659818328 |
| CTCF       | 0.057654508 | 0.017838177 | 0.659911077 |
| PLSCR1     | 0.008245151 | 0.000926435 | 0.659984337 |
| TLE1       | 0.084741553 | 0.02107138  | 0.660985001 |
| SHTN1      | 0.032271448 | 0.01883358  | 0.660998066 |
| ERCC6      | 0.047129811 | 0.099770545 | 0.661074463 |
| FOXL1      | 0.039633138 | 0.015515307 | 0.66130243  |
| MRPL58     | 0.000118288 | 0.00154121  | 0.66162518  |
| UBE2D3     | 0.008173517 | 0.00264054  | 0.661979142 |
| CPSF4      | 0.018533135 | 0.010020322 | 0.662391358 |
| SYNE2      | 0.017676293 | 0.011751066 | 0.662462685 |
| LRPAP1     | 0.044314481 | 0.005447044 | 0.662902567 |

|            |             |             |             |
|------------|-------------|-------------|-------------|
| RAB21      | 0.001779083 | 0.014047033 | 0.663143098 |
| MRPL14     | 0.042411803 | 0.007514179 | 0.663698778 |
| FBXO42     | 0.011581932 | 0.043044702 | 0.663785497 |
| CYP3A5     | 0.073126421 | 0.002106142 | 0.66379462  |
| ADGRE5     | 0.000805805 | 0.003701777 | 0.663905369 |
| USB1       | 0.00184823  | 2.32176E-05 | 0.664107901 |
| TMCC3      | 0.043798251 | 0.140065048 | 0.664138087 |
| PCMTD1     | 0.000950049 | 0.001738747 | 0.664298346 |
| CCDC137    | 0.021684654 | 0.045893438 | 0.664711763 |
| OSBPL1A    | 0.133962543 | 0.040169343 | 0.665245697 |
| CASP1      | 0.028979514 | 0.136784319 | 0.665310936 |
| CNIH4      | 0.042573238 | 0.091562103 | 0.665452175 |
| SLC44A3    | 0.042951569 | 0.109314715 | 0.666503219 |
| SVIL       | 0.009880353 | 0.000744657 | 0.666533717 |
| PRR14L     | 7.98983E-05 | 0.000151766 | 0.66669289  |
| REV1       | 0.094320184 | 0.049053682 | 0.666788024 |
| LAMA3      | 0.003305238 | 0.000728713 | 0.666821853 |
| CPSF7      | 0.034746982 | 0.15805174  | 0.667017497 |
| TIPARP-AS1 | 0.04084604  | 0.225200933 | 0.668011699 |
| EVA1C      | 0.022205835 | 0.09448299  | 0.668470039 |
| BAZ2B      | 0.113577168 | 0.035340148 | 0.668475895 |
| DDX5       | 0.000237853 | 0.000643108 | 0.668924895 |
| PDXK       | 0.016485541 | 0.047148368 | 0.669183109 |
| PCBP1      | 0.012832144 | 0.001537062 | 0.670184087 |
| TBC1D2B    | 0.03774382  | 0.086030348 | 0.671820258 |
| KLF13      | 0.025049843 | 0.034807313 | 0.671895143 |
| MAPK14     | 0.000882969 | 0.007733996 | 0.672276011 |
| HIST1H2AE  | 0.022166661 | 0.039274149 | 0.673054925 |
| AK4        | 0.024079969 | 0.16049007  | 0.67412389  |
| ZPR1       | 0.026272012 | 0.018847108 | 0.674124547 |
| VNN1       | 0.01105662  | 0.033708042 | 0.674253203 |
| PTK2B      | 0.002442155 | 0.056604828 | 0.674981173 |
| ARHGEF5    | 0.029350828 | 0.018682358 | 0.67530821  |
| TMTC3      | 0.004444782 | 0.015098965 | 0.67580252  |
| UQCRFS1    | 0.021715915 | 0.05186894  | 0.676628124 |
| TUBA1C     | 0.006508392 | 0.000422006 | 0.677735249 |
| R3HCC1L    | 0.064419895 | 0.03268321  | 0.677880354 |
| ATL2       | 0.016625427 | 0.00193373  | 0.678336779 |
| RUFY3      | 0.001066068 | 0.003601403 | 0.678609239 |
| MTERF2     | 0.239003352 | 0.033036475 | 0.678641821 |
| CDC5L      | 0.000749975 | 0.000768554 | 0.678718565 |
| AES        | 0.02610831  | 0.001690797 | 0.679292592 |
| SPEN       | 0.017714702 | 0.033394279 | 0.679470142 |

|            |             |             |             |
|------------|-------------|-------------|-------------|
| S100A3     | 0.038996911 | 0.104225562 | 0.679593162 |
| NDFIP1     | 0.04139245  | 0.013731528 | 0.679706409 |
| AP001157.1 | 0.019066434 | 0.03964072  | 0.681010134 |
| RARB       | 0.137701004 | 0.029149322 | 0.681423571 |
| ATF2       | 0.042879048 | 0.012348549 | 0.682371335 |
| LTA4H      | 0.00066948  | 0.099012886 | 0.682632881 |
| DDT        | 0.060661921 | 0.012327163 | 0.682818112 |
| GMEB1      | 0.040770539 | 0.115225326 | 0.683469239 |
| CIR1       | 0.004837011 | 0.00142731  | 0.683652726 |
| ARFIP2     | 0.008223789 | 0.013362269 | 0.683735281 |
| SLC38A7    | 0.006015049 | 0.016400121 | 0.683820182 |
| CDV3       | 0.007568376 | 0.014842195 | 0.684245326 |
| MAPK13     | 0.094061294 | 0.026689304 | 0.684586105 |
| PGRMC1     | 0.082080596 | 0.017790036 | 0.684597586 |
| TMPRSS3    | 0.018929437 | 0.018760612 | 0.685717393 |
| MAPKAPK5   | 0.00081833  | 0.00155782  | 0.685865343 |
| GAN        | 0.007876189 | 0.005736085 | 0.686989632 |
| PARG       | 0.011913972 | 0.025072098 | 0.687468816 |
| YIPF6      | 0.028785122 | 0.012458115 | 0.688996289 |
| FBXO32     | 0.041524405 | 0.01172717  | 0.690029054 |
| YBX3       | 0.01691565  | 0.071353192 | 0.690052487 |
| ACP5       | 0.06847225  | 0.045867228 | 0.690606718 |
| ARAP1      | 0.020119327 | 0.041309527 | 0.690654602 |
| SERPINB1   | 0.027419541 | 0.013587903 | 0.691167932 |
| PDZK1IP1   | 0.025574548 | 0.006814822 | 0.691334303 |
| CEP112     | 0.101029963 | 0.034593566 | 0.691376969 |
| MVB12A     | 0.003921168 | 0.025987444 | 0.691509901 |
| GOLGB1     | 0.018872378 | 0.032721555 | 0.692423381 |
| ITGB4      | 0.004262568 | 0.001481985 | 0.692553983 |
| UBE2R2     | 0.096369931 | 0.042867683 | 0.692672017 |
| KLK10      | 0.099491324 | 0.001174931 | 0.692926335 |
| TMC6       | 0.101777339 | 0.049983183 | 0.693545186 |
| FOXP1      | 0.027011332 | 0.023561917 | 0.694746623 |
| RNF126     | 0.069834277 | 0.003619737 | 0.695374371 |
| MYNN       | 0.084986495 | 0.03269531  | 0.695912295 |
| DLGAP4     | 0.045274597 | 0.12020492  | 0.696000002 |
| HMGA1      | 0.015302501 | 0.010162324 | 0.696216187 |
| MAP3K8     | 0.031862349 | 0.002459488 | 0.69660108  |
| MSI2       | 0.002433128 | 0.000425129 | 0.696848119 |
| RAB5A      | 0.078193351 | 0.026545309 | 0.697371499 |
| TXNDC12    | 0.030414573 | 0.019434971 | 0.69762623  |
| EXT2       | 0.020824691 | 0.042200698 | 0.697804059 |
| FBXO11     | 0.045672526 | 0.137220759 | 0.698451532 |



|            |             |             |             |
|------------|-------------|-------------|-------------|
| ATG5       | 0.021758438 | 0.093540077 | 0.698572158 |
| GBP4       | 0.02714344  | 0.002100397 | 0.699998465 |
| TNKS2      | 0.000297202 | 2.37233E-05 | 0.700155703 |
| EIF1       | 0.010935849 | 0.012453256 | 0.700393314 |
| ARGLU1     | 0.045500562 | 0.120651553 | 0.700463036 |
| ETFRF1     | 0.014566559 | 0.005969106 | 0.700476342 |
| NCBP2-AS2  | 0.025588986 | 0.038518394 | 0.700567593 |
| NDUFA6     | 0.011098675 | 0.017642555 | 0.700810798 |
| CASP10     | 0.039274427 | 0.02243468  | 0.701220208 |
| UBE2G2     | 0.048001747 | 0.007571489 | 0.701466995 |
| SERPINB9P1 | 0.00688366  | 0.005507837 | 0.701553507 |
| INTS4      | 0.04004953  | 0.138200594 | 0.701647974 |
| PNPLA6     | 0.16251233  | 0.008925091 | 0.701767685 |
| GEMIN8     | 0.045517034 | 0.161765386 | 0.70183788  |
| C1R        | 0.02354461  | 0.0293215   | 0.701972154 |
| LIG3       | 0.028471547 | 0.099989223 | 0.702942244 |
| TROVE2     | 0.014682097 | 0.002814908 | 0.703052426 |
| FIG4       | 0.01507288  | 0.009133709 | 0.70308739  |
| MED1       | 0.026638323 | 0.053722535 | 0.704049376 |
| LSM12      | 0.014435836 | 0.005492221 | 0.704124249 |
| NPLOC4     | 0.004317772 | 0.000360686 | 0.704344644 |
| TRIM47     | 0.048701637 | 0.087669428 | 0.705182884 |
| RPL13A     | 0.090389657 | 0.037622182 | 0.705275338 |
| ILF3-DT    | 0.002510304 | 0.000266312 | 0.705340183 |
| ZNF587     | 0.017260834 | 0.016508883 | 0.705555079 |
| LHPP       | 0.112767412 | 0.047696221 | 0.706256768 |
| TRAPPC10   | 0.00661733  | 0.011671416 | 0.707807337 |
| ITGA2      | 0.011888862 | 0.016021586 | 0.708093972 |
| TNFRSF10A  | 0.010573903 | 0.003713063 | 0.708307294 |
| CLTB       | 0.115270433 | 0.035476314 | 0.709300662 |
| RMDN2      | 0.045187947 | 0.083391044 | 0.709411732 |
| UBE2V1     | 0.047527628 | 0.016066339 | 0.709427641 |
| AFF4       | 0.001910032 | 0.003608219 | 0.709995024 |
| ZBTB38     | 0.019531854 | 0.004241009 | 0.710885784 |
| RALGAPB    | 0.008374198 | 0.0040147   | 0.711011209 |
| MLLT1      | 0.011512195 | 0.064413219 | 0.711193211 |
| LGMN       | 0.006932093 | 0.006252459 | 0.711701385 |
| WDR45B     | 0.003399944 | 0.000678777 | 0.711838535 |
| DHX8       | 0.041853618 | 0.015834407 | 0.712405698 |
| S100A10    | 0.02038061  | 0.016096458 | 0.712605633 |
| ZKSCAN1    | 0.005490527 | 0.023097912 | 0.712629811 |
| GPAT4      | 0.00205565  | 0.011490174 | 0.712712443 |
| OAS1       | 0.022972489 | 0.016796471 | 0.713052803 |

|           |             |             |             |
|-----------|-------------|-------------|-------------|
| C16orf58  | 0.090826756 | 0.020429179 | 0.713053298 |
| SLC17A9   | 0.131139954 | 0.025255907 | 0.713539002 |
| ELOVL7    | 0.038565262 | 0.037681762 | 0.713664178 |
| ZFP91     | 0.015359316 | 0.00211764  | 0.713709552 |
| SUPT5H    | 0.009500065 | 0.012000288 | 0.714039423 |
| ZSWIM4    | 0.001655211 | 0.00129029  | 0.714470141 |
| ZFAND5    | 0.005525005 | 0.001256344 | 0.714571103 |
| ZFY-AS1   | 0.03041801  | 0.034105819 | 0.715326441 |
| OTUD4     | 0.004077003 | 0.002814183 | 0.715406223 |
| CD59      | 0.000731913 | 0.000170639 | 0.715746395 |
| SLU7      | 0.001750371 | 0.005239002 | 0.716153835 |
| MED19     | 0.067640117 | 0.037264975 | 0.716226552 |
| RBM5      | 0.028196371 | 0.024446215 | 0.716631716 |
| ANKEF1    | 0.099766262 | 0.037061553 | 0.716762891 |
| ZNF292    | 0.000683127 | 0.007157353 | 0.716794934 |
| KHDRBS3   | 0.049507824 | 0.029240836 | 0.716933142 |
| TEN1      | 0.009091419 | 0.001855726 | 0.716980489 |
| NAMPT     | 0.011951096 | 0.005057014 | 0.717203028 |
| AHDC1     | 0.004537946 | 0.0057836   | 0.71762158  |
| CDKN1A    | 0.000201201 | 3.69309E-05 | 0.717717205 |
| ZCCHC2    | 0.014641084 | 0.006436341 | 0.717826327 |
| HS3ST1    | 0.022077721 | 0.000831843 | 0.717845552 |
| AP1B1     | 0.012031236 | 0.004675674 | 0.719053396 |
| PLAUR     | 0.000457013 | 1.00427E-05 | 0.719115305 |
| KCTD10    | 0.045010695 | 0.128193214 | 0.719502373 |
| FAM96B    | 0.038874981 | 0.028979346 | 0.719601502 |
| MYH14     | 0.00033654  | 5.35792E-05 | 0.719893239 |
| CGAS      | 0.003224091 | 0.003967258 | 0.720004076 |
| ESPN      | 0.066153965 | 0.041263778 | 0.72007192  |
| RIPK3     | 0.005899443 | 0.020120639 | 0.720429567 |
| PRRG4     | 0.010878236 | 0.036785092 | 0.720572459 |
| DDX56     | 0.001275621 | 8.04964E-05 | 0.720860882 |
| MYH9      | 0.029240556 | 0.009427092 | 0.720993499 |
| MFSD5     | 0.001130553 | 0.00012243  | 0.721162316 |
| TBC1D9    | 0.102297796 | 0.038847133 | 0.721227839 |
| ARHGAP21  | 0.036156991 | 0.011132638 | 0.721231474 |
| AFAP1-AS1 | 0.009235192 | 0.003394865 | 0.721995623 |
| TUT4      | 0.030525588 | 0.026648712 | 0.72207888  |
| SAP30     | 0.000875545 | 0.001651551 | 0.722184307 |
| MRPL30    | 0.042040518 | 0.007570945 | 0.722925054 |
| RB1CC1    | 0.008260809 | 0.083696215 | 0.72321326  |
| MIF4GD    | 0.026046433 | 0.227010615 | 0.72351893  |
| IER5      | 0.092931971 | 0.018454519 | 0.723696352 |

|          |             |             |             |
|----------|-------------|-------------|-------------|
| OTUD5    | 0.0029512   | 5.93467E-05 | 0.723936557 |
| KTN1     | 0.01150286  | 0.004188494 | 0.723969289 |
| PLEKHB2  | 0.003159724 | 0.006293777 | 0.724100926 |
| FAF2     | 0.014214524 | 0.025317964 | 0.724166232 |
| SHLD1    | 0.03368413  | 0.033992426 | 0.7243587   |
| CAP1     | 0.003208704 | 0.000141347 | 0.724462485 |
| PXYLP1   | 0.040291118 | 0.225200933 | 0.724934289 |
| ATG3     | 0.287707926 | 0.042251718 | 0.72607238  |
| RAB7A    | 9.31632E-05 | 7.17113E-06 | 0.726163869 |
| SHISA5   | 0.016502491 | 0.041812617 | 0.727453543 |
| NT5E     | 0.024598972 | 0.00223827  | 0.727457875 |
| NAPRT    | 0.026600715 | 0.001648192 | 0.72768445  |
| ZNF500   | 0.092807058 | 0.041331676 | 0.728152037 |
| ARF3     | 0.074146335 | 0.038945327 | 0.728159542 |
| CAMK2G   | 0.006416991 | 0.03033763  | 0.728315659 |
| VPS28    | 0.001138917 | 9.58191E-05 | 0.728422824 |
| PDE12    | 0.048717584 | 0.089813661 | 0.728739242 |
| IPCEF1   | 0.039625764 | 0.240940913 | 0.729355465 |
| PGPEP1   | 0.113996108 | 0.016860557 | 0.729718516 |
| CDK7     | 0.013463717 | 0.004345895 | 0.729942248 |
| NORAD    | 0.052522715 | 0.020573494 | 0.730559039 |
| ATMIN    | 0.166890458 | 0.028349699 | 0.731046193 |
| EN2      | 0.23331272  | 0.034828542 | 0.731299326 |
| BIRC2    | 0.058663524 | 0.04371617  | 0.731314862 |
| AFDN     | 0.032577307 | 0.010304414 | 0.732483915 |
| DOK4     | 0.010253483 | 0.011779498 | 0.732895924 |
| CHD8     | 0.00130375  | 0.000719305 | 0.733235835 |
| TGOLN2   | 0.032859019 | 0.011384951 | 0.733929133 |
| CLUH     | 0.00132162  | 0.012401148 | 0.73422139  |
| SREK1IP1 | 0.083097666 | 0.036614442 | 0.734515384 |
| CHURC1   | 0.068602193 | 0.021385637 | 0.734636275 |
| RNF38    | 0.008358536 | 0.002669853 | 0.735127593 |
| NEU1     | 0.005523887 | 0.009461743 | 0.736591186 |
| LAPTM4A  | 0.007670733 | 0.017073932 | 0.73665505  |
| FAM210A  | 0.003554137 | 0.002612876 | 0.73777039  |
| THRAP3   | 0.0299535   | 0.044131791 | 0.738282148 |
| GRPEL1   | 0.01767735  | 0.006044674 | 0.738459815 |
| ZNF207   | 0.012053442 | 0.006156252 | 0.739355    |
| TSNAX    | 0.01042865  | 0.003376725 | 0.739587041 |
| KIF3A    | 0.199626649 | 0.036027881 | 0.739827499 |
| TNFRSF14 | 0.000871405 | 0.004000722 | 0.740017493 |
| FUCA1    | 0.011315492 | 0.033719795 | 0.740039217 |
| RYK      | 0.127208588 | 0.046267587 | 0.740088908 |

|            |             |             |             |
|------------|-------------|-------------|-------------|
| HTATSF1    | 0.089045921 | 0.031561621 | 0.740517023 |
| LCAT       | 0.031758192 | 0.019049289 | 0.740610903 |
| ANTXR2     | 0.005900974 | 0.007598471 | 0.741096328 |
| ALPK1      | 0.021580925 | 0.017494602 | 0.741513265 |
| COX7A2     | 0.009775663 | 0.000331013 | 0.741698033 |
| N4BP1      | 0.01149824  | 0.010579206 | 0.741874677 |
| ATP10B     | 0.006737541 | 0.005679092 | 0.742764675 |
| HIP1R      | 0.017955997 | 0.005393164 | 0.743421695 |
| SNRNP27    | 0.080587652 | 0.017518226 | 0.744020712 |
| MXI1       | 0.011032752 | 0.009278732 | 0.74442824  |
| FAM135A    | 0.000487875 | 0.007193008 | 0.745343202 |
| ATP2A2     | 0.048538583 | 0.020632494 | 0.745814088 |
| OGFR       | 0.060353088 | 0.0298179   | 0.745840508 |
| FOXA2      | 0.110425569 | 0.017711084 | 0.746867807 |
| AP1M2      | 0.087338616 | 0.034887986 | 0.74753171  |
| UNC50      | 0.031759876 | 0.016445472 | 0.748290545 |
| FAM3A      | 0.084436255 | 0.040610811 | 0.748485185 |
| TIMM23     | 0.010986264 | 0.010987674 | 0.749101079 |
| IKZF1      | 0.058136239 | 0.004073728 | 0.749165614 |
| KLK8       | 0.099086971 | 0.042891487 | 0.749783177 |
| NMI        | 8.33009E-05 | 6.274E-05   | 0.751073256 |
| ATP5MD     | 0.025412565 | 0.009513185 | 0.75174382  |
| TPD52      | 0.071747905 | 0.042513285 | 0.752201697 |
| GPN2       | 0.034182706 | 0.011215465 | 0.752351864 |
| ANKRD13D   | 0.043459565 | 0.112357315 | 0.752379716 |
| APOL6      | 0.004042814 | 0.003411946 | 0.752520757 |
| MAFK       | 0.120198296 | 0.042099277 | 0.752689541 |
| SEMA4C     | 0.022956362 | 0.097468612 | 0.753516253 |
| AKNA       | 0.001084332 | 0.000919192 | 0.754068083 |
| OTULIN     | 0.005175663 | 0.004033261 | 0.755546921 |
| TMCO3      | 0.003016428 | 0.000339507 | 0.755580049 |
| USP40      | 0.020185308 | 0.008585538 | 0.755814387 |
| MIGA2      | 0.041732226 | 0.013653946 | 0.756033112 |
| APOL1      | 0.003262793 | 0.000255572 | 0.756478049 |
| MICU2      | 0.000534365 | 0.008711437 | 0.756801735 |
| COX8A      | 0.193169647 | 0.047834751 | 0.757756367 |
| FEM1C      | 0.095584215 | 0.017226792 | 0.758883975 |
| PPIG       | 0.034156931 | 0.060931764 | 0.759126263 |
| SPTLC2     | 0.057644185 | 0.025473588 | 0.759548912 |
| HYAL1      | 0.022451613 | 0.189275335 | 0.759731233 |
| AC016065.1 | 0.051395131 | 0.04077816  | 0.760162465 |
| PLGRKT     | 0.009976706 | 0.024623844 | 0.760246699 |
| NFKBIZ     | 0.002859031 | 0.00351454  | 0.760522052 |

|            |             |             |             |
|------------|-------------|-------------|-------------|
| PSMG2      | 0.014870066 | 0.027384423 | 0.76077753  |
| GABPB1     | 0.001183709 | 0.005089126 | 0.760941196 |
| TSPAN14    | 0.006125805 | 0.0063475   | 0.760976927 |
| HMG20A     | 0.000117796 | 0.000951615 | 0.761093462 |
| MEF2A      | 0.000715888 | 0.002734681 | 0.761410724 |
| RCE1       | 0.00685597  | 0.002186628 | 0.76148371  |
| SNX1       | 0.026374074 | 0.015380687 | 0.761503432 |
| QDPR       | 0.008406513 | 0.038283472 | 0.761786493 |
| VWA1       | 0.04527715  | 0.016229501 | 0.762109247 |
| RPL36AL    | 0.050897728 | 0.049219252 | 0.762203785 |
| PTGR1      | 0.027285819 | 0.014098122 | 0.76284862  |
| TIMP1      | 0.000389403 | 0.000271937 | 0.763400119 |
| SEMA7A     | 0.03393048  | 0.045608321 | 0.763819438 |
| TMEM14A    | 0.089250019 | 0.032563202 | 0.76385501  |
| FDPS       | 0.081150285 | 0.025432039 | 0.764223649 |
| GHITM      | 0.003884953 | 0.001398162 | 0.764277298 |
| THSD4      | 0.039736621 | 0.103199088 | 0.764588533 |
| CDS2       | 0.001136084 | 0.00777636  | 0.764710846 |
| ENAH       | 0.056280392 | 0.042957669 | 0.76471984  |
| GPN3       | 0.079913733 | 0.046843886 | 0.765289263 |
| PCMT1      | 0.009043586 | 0.002847366 | 0.765400127 |
| ATP6V0E1   | 0.029002049 | 0.036627938 | 0.765681557 |
| AC020978.5 | 0.095317905 | 0.014948732 | 0.766283113 |
| ZNF608     | 0.022126309 | 0.01013844  | 0.76676248  |
| TATDN2     | 0.001791702 | 0.038764306 | 0.766831197 |
| RC3H1      | 0.002302486 | 0.005006383 | 0.766979174 |
| ZG16B      | 0.003938576 | 0.010518225 | 0.768151385 |
| NECTIN3    | 0.033593233 | 0.006016848 | 0.769011824 |
| SMC6       | 0.009843238 | 0.007309483 | 0.7697284   |
| CCPG1      | 0.043821346 | 0.127618546 | 0.769800367 |
| PLBD1      | 0.010362888 | 0.004272311 | 0.770174333 |
| ERO1A      | 0.000742709 | 1.78417E-05 | 0.770517414 |
| MYO1C      | 5.27371E-06 | 0.000384841 | 0.770586747 |
| IFT22      | 0.07161931  | 0.030823882 | 0.771363012 |
| MTMR14     | 0.019529929 | 0.03405011  | 0.772185772 |
| OSBPL3     | 0.020574779 | 0.009425562 | 0.772961622 |
| YKT6       | 0.004340612 | 0.002060712 | 0.773152519 |
| CCDC107    | 0.039390101 | 0.021575552 | 0.773344777 |
| LMF2       | 0.00014131  | 0.000178766 | 0.773673455 |
| BOK        | 0.018918244 | 0.022456104 | 0.773833691 |
| ELOVL1     | 0.048194009 | 0.015065343 | 0.774684911 |
| AACS       | 0.047107179 | 0.02462348  | 0.775016136 |
| NDOR1      | 0.181571994 | 0.011861118 | 0.775395408 |

|          |             |             |             |
|----------|-------------|-------------|-------------|
| USF1     | 0.026371156 | 0.024816028 | 0.775906212 |
| SLC38A6  | 0.00741064  | 0.01984279  | 0.776377896 |
| MACF1    | 0.016257645 | 0.034077704 | 0.776655598 |
| DENND6A  | 0.002298226 | 7.09075E-05 | 0.776655987 |
| PSMD14   | 0.00421558  | 0.028855394 | 0.776734523 |
| AFTPH    | 0.053261012 | 0.0289568   | 0.77746366  |
| FAM208A  | 0.003277498 | 0.006942135 | 0.778747467 |
| BCL2L15  | 0.004932028 | 0.001422406 | 0.77890029  |
| ASXL2    | 0.002679497 | 5.74294E-05 | 0.779128099 |
| ARPC5    | 0.0205248   | 0.0141419   | 0.77926217  |
| UROS     | 0.000615285 | 0.000119157 | 0.77958611  |
| ZNF410   | 0.040291118 | 0.139648087 | 0.780736738 |
| PTPN12   | 0.011375177 | 0.009562691 | 0.780883408 |
| MIR222HG | 0.019959778 | 0.015833363 | 0.781327739 |
| DNAJC8   | 0.034580483 | 0.018038569 | 0.782127594 |
| WDR1     | 0.019663834 | 0.014034073 | 0.782334867 |
| LINS1    | 0.002698065 | 0.000933882 | 0.782449692 |
| MED8     | 0.028035202 | 0.071549131 | 0.782800006 |
| ZNF574   | 0.049660502 | 0.032637615 | 0.782837277 |
| SYNC     | 0.081378223 | 0.037764445 | 0.784431508 |
| MISP3    | 0.091423268 | 0.032227771 | 0.784457729 |
| EEF1E1   | 0.030118114 | 0.036591417 | 0.784976149 |
| MAGED2   | 0.022239881 | 0.026474013 | 0.78536822  |
| DDX59    | 0.063891153 | 0.03908787  | 0.7856865   |
| KIF1B    | 0.029973112 | 0.041548845 | 0.785989113 |
| FUBP1    | 0.010054038 | 0.002961247 | 0.786102332 |
| ATP6AP1  | 0.010347071 | 0.006759029 | 0.78619807  |
| ZBTB41   | 0.031191037 | 0.098887971 | 0.786228286 |
| SERINC3  | 0.009030597 | 0.011816799 | 0.786669426 |
| TMUB1    | 0.021931924 | 0.006357019 | 0.787405368 |
| GID8     | 0.011773542 | 0.015820924 | 0.787889062 |
| CERK     | 0.014726531 | 0.029915084 | 0.787958435 |
| ABLIM3   | 0.028519037 | 0.039359072 | 0.788259647 |
| PPFIBP2  | 0.059998875 | 0.021944117 | 0.788518881 |
| LRRC14   | 0.046865056 | 0.015783377 | 0.788542371 |
| LAMB3    | 0.010295971 | 0.009404174 | 0.790207885 |
| SCAMP1   | 0.093492986 | 0.04505982  | 0.790429756 |
| TFB1M    | 0.009283707 | 0.013087166 | 0.79044013  |
| SLC35A2  | 0.028035107 | 0.014821754 | 0.790569453 |
| IL12RB1  | 0.036830228 | 0.067762526 | 0.790748927 |
| GLMP     | 0.00117917  | 3.59317E-05 | 0.790962835 |
| DDX3X    | 0.048731557 | 0.033583526 | 0.79104464  |
| TRIM11   | 0.008103048 | 0.003303344 | 0.791061922 |

|           |             |             |             |
|-----------|-------------|-------------|-------------|
| PDHX      | 0.089657816 | 0.044816531 | 0.791218939 |
| RIT1      | 0.013208102 | 0.130467251 | 0.791295919 |
| BAIAP2-DT | 0.018734677 | 0.01172179  | 0.791719806 |
| PLEKHA1   | 0.116475781 | 0.026590387 | 0.791994986 |
| RNF157    | 0.041002621 | 0.225200933 | 0.792232516 |
| HS6ST1    | 0.007523549 | 0.004392908 | 0.792362745 |
| KLF10     | 0.064376165 | 0.015463134 | 0.793613663 |
| ELF2      | 2.58034E-05 | 7.02319E-06 | 0.7937023   |
| HECTD4    | 0.00480746  | 0.007676202 | 0.794349076 |
| RARS      | 0.027651018 | 0.012508837 | 0.794478472 |
| HNRNPA0   | 0.005245324 | 0.000557917 | 0.794532595 |
| CHD6      | 0.03509563  | 0.076332438 | 0.794603404 |
| SF3B1     | 0.027323446 | 0.016531984 | 0.794999499 |
| ZNF337    | 0.107477277 | 0.033965502 | 0.795300276 |
| TMCO1     | 0.006632379 | 0.003458959 | 0.795602476 |
| NEPRO     | 0.042439997 | 0.083090496 | 0.796218405 |
| ZNF571    | 0.045234882 | 0.034307548 | 0.796541263 |
| HIPK2     | 0.043487664 | 0.132160428 | 0.796629362 |
| NSMAF     | 0.10050145  | 0.007734106 | 0.79729108  |
| MT-ND5    | 0.000391247 | 0.000202847 | 0.797428632 |
| ITSN1     | 0.012366375 | 0.003364301 | 0.798127099 |
| ATP6V1A   | 0.027001697 | 0.005322725 | 0.798152864 |
| RPP25     | 0.107658343 | 0.012674433 | 0.798173044 |
| INSIG2    | 0.017244043 | 0.02981653  | 0.798392259 |
| HS3ST3B1  | 0.046602543 | 0.225200933 | 0.798424302 |
| KRT17     | 0.012188991 | 0.019103484 | 0.79903771  |
| SINHCAF   | 0.002814047 | 0.014347097 | 0.799869848 |
| ZNF668    | 0.083942568 | 0.010680942 | 0.800256123 |
| TRPM4     | 0.052116464 | 0.008954851 | 0.800261872 |
| FOCAD     | 0.009993048 | 0.029830108 | 0.800647192 |
| DPP9      | 0.040078023 | 0.021135336 | 0.801297701 |
| DDX42     | 0.008164491 | 0.008800637 | 0.80223014  |
| MRPS22    | 0.042837404 | 0.005651373 | 0.802333394 |
| HSD3B7    | 0.004461614 | 0.003616003 | 0.802367695 |
| NDUFV2    | 0.002747529 | 0.000700489 | 0.802483331 |
| RBSN      | 0.041374576 | 0.049507206 | 0.803436797 |
| PDIA3     | 0.025184244 | 0.020563037 | 0.803974666 |
| HSPBP1    | 0.042810249 | 0.056699406 | 0.804567283 |
| TIMM17B   | 0.024926196 | 0.010613028 | 0.804780663 |
| RAB1B     | 0.000921169 | 0.001419784 | 0.805879293 |
| SAR1A     | 0.042933124 | 0.005607552 | 0.806368636 |
| TMEM267   | 0.050230561 | 0.032051111 | 0.806660267 |
| CHCHD1    | 0.080599179 | 0.039507757 | 0.807519041 |

|           |             |             |             |
|-----------|-------------|-------------|-------------|
| ARSK      | 0.095728594 | 0.033309524 | 0.807599804 |
| PTGFRN    | 0.003181988 | 0.018650493 | 0.807859365 |
| ACOT9     | 0.018780082 | 0.035725887 | 0.807970847 |
| NBAS      | 0.048688627 | 0.250110237 | 0.808695407 |
| STMP1     | 0.009651846 | 0.013654306 | 0.809024947 |
| EXOSC7    | 0.029505462 | 0.017844727 | 0.809534085 |
| HNRNPUL1  | 0.07674295  | 0.044726661 | 0.809742116 |
| TRIM8     | 0.003424279 | 0.00741313  | 0.811702195 |
| NFKBID    | 0.090495213 | 0.028219711 | 0.811930984 |
| TMEM65    | 0.077514353 | 0.014512354 | 0.812422958 |
| GLTPD2    | 0.05446098  | 0.047192018 | 0.812992495 |
| SDF4      | 0.000232092 | 8.97609E-06 | 0.813549293 |
| CAPRIN2   | 0.193580546 | 0.006811906 | 0.814473518 |
| FBXO7     | 0.054867265 | 0.025536512 | 0.814640379 |
| PAK2      | 0.001705593 | 0.001903185 | 0.815668131 |
| DHX32     | 0.016405082 | 0.003583405 | 0.81572828  |
| ZNF408    | 0.011264296 | 0.004803764 | 0.815945759 |
| LNPEP     | 0.015383064 | 0.008451353 | 0.816271274 |
| CCDC66    | 0.138985971 | 0.039551496 | 0.816303867 |
| SH3BP5L   | 0.041037929 | 0.044426147 | 0.816728637 |
| MAP4K4    | 0.000478998 | 0.000677031 | 0.816778851 |
| RAB11FIP4 | 0.008251776 | 0.001322976 | 0.816980389 |
| PLEKHA8   | 0.027790798 | 0.074594402 | 0.818158887 |
| NLK       | 0.008570017 | 0.005808726 | 0.818166605 |
| MAP3K13   | 0.018977546 | 0.00698072  | 0.818267139 |
| REEP3     | 0.017746441 | 0.006545034 | 0.818384349 |
| ADAR      | 4.58841E-05 | 6.12643E-06 | 0.8188802   |
| RAF1      | 0.018242994 | 0.01546923  | 0.819094023 |
| FIGNL1    | 0.055189037 | 0.021238567 | 0.819163865 |
| LPP       | 2.02188E-05 | 0.000224195 | 0.819172529 |
| NBN       | 0.019278538 | 0.029901783 | 0.819335226 |
| IL2RG     | 0.033677831 | 0.0264945   | 0.819703121 |
| PHF10     | 0.111217511 | 0.026018608 | 0.820132643 |
| CNOT6     | 0.007987405 | 0.033409258 | 0.820450328 |
| BTBD6     | 0.043580182 | 0.046002494 | 0.820901043 |
| TNRC6B    | 0.012734634 | 0.023821185 | 0.821669644 |
| APEH      | 0.049348622 | 0.031344665 | 0.821855446 |
| CCDC47    | 0.018899137 | 0.016718944 | 0.822051406 |
| SFT2D3    | 0.003128011 | 4.20253E-05 | 0.822187477 |
| SIL1      | 4.31262E-05 | 0.000357805 | 0.822325857 |
| C1orf131  | 0.004537489 | 0.003365386 | 0.822826746 |
| CTDSPL2   | 0.003462389 | 0.010612435 | 0.823921505 |
| KLHL21    | 0.05392179  | 0.04608117  | 0.824080322 |



|            |             |             |             |
|------------|-------------|-------------|-------------|
| MED9       | 0.040487982 | 0.035335691 | 0.824095719 |
| TPRG1L     | 0.0077649   | 0.007119853 | 0.82437976  |
| ARMT1      | 0.022686992 | 0.002931359 | 0.824466176 |
| ENTPD4     | 0.044099907 | 0.092130604 | 0.825328438 |
| CUL1       | 0.042217966 | 0.023454846 | 0.825720903 |
| UBXN8      | 0.01585664  | 0.096805426 | 0.825781984 |
| AC058791.1 | 0.096786338 | 0.045082921 | 0.82578703  |
| ESAM       | 0.046881596 | 0.014940177 | 0.827092348 |
| DENND5B    | 0.005526804 | 0.027933545 | 0.827938629 |
| ELAC2      | 0.023511457 | 0.047152987 | 0.828134729 |
| TCTEX1D4   | 0.044940073 | 0.046226933 | 0.828704766 |
| COL9A2     | 0.016712904 | 0.012834262 | 0.829317353 |
| HIF1A      | 0.003099038 | 0.000999315 | 0.829516059 |
| N4BP2L2    | 0.013143899 | 0.010958525 | 0.829992615 |
| TNS3       | 0.071282587 | 0.028041381 | 0.83007257  |
| CSNK1G1    | 0.023643643 | 0.003467568 | 0.83097968  |
| ONECUT3    | 0.066463669 | 0.019340991 | 0.831032214 |
| PHLPP2     | 0.096298499 | 0.034966607 | 0.831322003 |
| ZNF789     | 0.215194124 | 0.03750847  | 0.831397078 |
| SSR1       | 0.019482726 | 0.027318744 | 0.831621081 |
| ABRAXAS2   | 0.03033092  | 0.038878558 | 0.831769177 |
| LRP12      | 0.239003352 | 0.035805983 | 0.831813121 |
| UCKL1      | 0.00620352  | 0.012802103 | 0.83194132  |
| EPAS1      | 0.02793867  | 0.020177337 | 0.832131781 |
| AL450998.2 | 0.022063752 | 0.002760566 | 0.832266397 |
| GFPT1      | 0.018434452 | 0.001698878 | 0.832321507 |
| SLC25A28   | 0.013894642 | 0.013218392 | 0.832443032 |
| EPS15L1    | 0.015026653 | 0.023726663 | 0.833400768 |
| MSRB1      | 0.025701754 | 0.023220067 | 0.833445944 |
| FOXD2      | 0.094893311 | 0.044179871 | 0.835865011 |
| SMIM29     | 0.037022805 | 0.03366951  | 0.835900296 |
| CTU1       | 0.001584158 | 0.00618786  | 0.836522578 |
| IL6ST      | 0.025192766 | 0.020918061 | 0.836945403 |
| METTL13    | 0.00596319  | 0.018872792 | 0.83725046  |
| KYAT3      | 0.058072734 | 0.012266164 | 0.83826479  |
| MMGT1      | 0.006233624 | 0.003347861 | 0.838809404 |
| GCC2       | 0.009308032 | 0.003548314 | 0.838906052 |
| SH2D4A     | 0.001805437 | 0.000117276 | 0.839217609 |
| ACSL5      | 0.000423409 | 0.000153758 | 0.839472469 |
| TFE3       | 0.008031872 | 0.005384174 | 0.840505539 |
| QRSL1      | 0.053362957 | 0.028885547 | 0.840754378 |
| LGALS8     | 0.003037867 | 0.003416732 | 0.841030789 |
| EIPR1      | 0.048067268 | 0.047829777 | 0.841108159 |

|           |             |             |             |
|-----------|-------------|-------------|-------------|
| FBXO21    | 0.040920793 | 0.086892641 | 0.8413698   |
| CTBS      | 0.040965414 | 0.025836966 | 0.84164684  |
| KIAA1217  | 0.001799877 | 0.000390153 | 0.842093617 |
| PNRC2     | 0.025534271 | 0.012893938 | 0.842260569 |
| MCM3AP    | 0.014246042 | 0.017967367 | 0.844585118 |
| FBXW7     | 0.02851651  | 0.011501937 | 0.844587641 |
| CDR2      | 0.004081765 | 0.004135951 | 0.844969485 |
| SYTL4     | 0.007900944 | 0.001393066 | 0.845064131 |
| C1D       | 0.080789415 | 0.044268782 | 0.845268083 |
| SECISBP2L | 0.042839235 | 0.035579957 | 0.846626985 |
| PAK4      | 0.022369323 | 0.0087597   | 0.847066428 |
| SMIM31    | 0.024333452 | 0.009667156 | 0.847626104 |
| MAP4      | 0.027681198 | 0.048559588 | 0.848092773 |
| DDX41     | 0.014565454 | 0.010698792 | 0.848203833 |
| TMSB10    | 0.036592257 | 0.007186683 | 0.848645585 |
| FOXO3     | 0.005660168 | 0.001509118 | 0.848891728 |
| GFM1      | 0.021454893 | 0.008775102 | 0.849500718 |
| CYB561    | 0.016889664 | 0.034796653 | 0.850338857 |
| SRP14     | 0.005050569 | 0.000971308 | 0.850507562 |
| PYROXD1   | 0.022778836 | 0.063528777 | 0.85065051  |
| TMEM187   | 0.031718745 | 0.034770766 | 0.85072977  |
| BZW2      | 0.018736478 | 0.02276002  | 0.851469878 |
| LRRC56    | 0.054837683 | 0.031770359 | 0.851566992 |
| IFIT3     | 0.008603751 | 0.000472383 | 0.851771777 |
| PLEKHM2   | 0.029559585 | 0.024831651 | 0.851950857 |
| TBCCD1    | 0.049455907 | 0.082979484 | 0.852200068 |
| MOB1A     | 0.012733459 | 0.002706113 | 0.852554045 |
| LPIN1     | 0.043145861 | 0.027058026 | 0.852826967 |
| GTF2B     | 0.016822087 | 0.016076492 | 0.853166011 |
| GGA1      | 0.002760779 | 0.004798893 | 0.853260829 |
| TMEM120A  | 0.024399559 | 0.007255391 | 0.854845763 |
| CUL2      | 0.014109448 | 0.018252628 | 0.854907396 |
| TMX1      | 0.013223774 | 0.005344472 | 0.85530728  |
| DCTN6     | 0.046130787 | 0.018104261 | 0.856064721 |
| EIF2B1    | 0.012329616 | 0.013943523 | 0.856255171 |
| STK38     | 0.062593383 | 0.045308233 | 0.856598139 |
| CSNK1D    | 0.069217359 | 0.028777247 | 0.856662701 |
| TTC13     | 0.027934829 | 0.087657242 | 0.857636629 |
| ANKLE2    | 0.029271937 | 0.00423414  | 0.858117171 |
| UTP4      | 0.084588491 | 0.036984353 | 0.858238842 |
| SOCS3     | 0.00783243  | 0.004197207 | 0.859772372 |
| TNFAIP3   | 0.002379558 | 0.00177293  | 0.860011001 |
| TBX15     | 0.04678759  | 0.043164994 | 0.860665837 |

|          |             |             |             |
|----------|-------------|-------------|-------------|
| RTRAF    | 0.043806934 | 0.021605888 | 0.861120586 |
| LYRM2    | 0.029423781 | 0.04657634  | 0.861177408 |
| IL23A    | 0.028862603 | 0.021371434 | 0.86131475  |
| UBE2K    | 0.00015646  | 0.000139779 | 0.861533422 |
| RPS27    | 0.026919641 | 0.02090878  | 0.861665633 |
| IFT52    | 0.011498177 | 0.01036617  | 0.862006699 |
| ARMCX3   | 0.01921373  | 0.032356329 | 0.862636408 |
| IRGQ     | 0.02796193  | 0.037584364 | 0.862879498 |
| NSD3     | 0.002457907 | 0.000382595 | 0.862939748 |
| HDDC3    | 0.074640871 | 0.039777684 | 0.863153017 |
| CEMIP2   | 0.00070144  | 0.000247259 | 0.863486027 |
| NOC2L    | 0.039342333 | 0.023318915 | 0.864707579 |
| ATP2C1   | 0.025011053 | 0.030327155 | 0.865062344 |
| TAPBPL   | 0.007407136 | 0.013084309 | 0.865083927 |
| LRIG1    | 0.022887359 | 0.011414009 | 0.86513134  |
| SRP19    | 0.046740047 | 0.04052343  | 0.865192678 |
| FUS      | 0.007809838 | 0.010679204 | 0.865658288 |
| WDR73    | 0.022776995 | 0.018043447 | 0.865731032 |
| PPP1R15B | 0.040454581 | 0.0805694   | 0.866257579 |
| ZNF33B   | 0.017949779 | 0.00660148  | 0.866599543 |
| PIGG     | 0.023911238 | 0.020772269 | 0.866784339 |
| PQLC3    | 0.035642754 | 0.03877284  | 0.866885066 |
| CDC42EP2 | 0.022720357 | 0.006794926 | 0.867054571 |
| C4orf19  | 0.028684052 | 0.01182883  | 0.867078665 |
| CSNK1G2  | 0.00379295  | 0.003270055 | 0.867146623 |
| CXorf40B | 0.04049688  | 0.039351533 | 0.867373762 |
| ORMDL3   | 0.032076112 | 0.00209323  | 0.867818603 |
| SLC49A3  | 0.007515151 | 0.00210133  | 0.867969879 |
| ACTR2    | 0.020932158 | 0.009896206 | 0.869383666 |
| USP33    | 0.007468256 | 0.005359502 | 0.870377771 |
| SPRTN    | 0.031376835 | 0.011663932 | 0.870595995 |
| MAGED1   | 0.048394474 | 0.212449905 | 0.870975485 |
| LAMP1    | 0.058375388 | 0.049574769 | 0.87108582  |
| SEPT10   | 0.055291292 | 0.03924803  | 0.871786111 |
| ZNF800   | 0.019550541 | 0.027501665 | 0.87196798  |
| DDX19B   | 0.000425924 | 0.01277092  | 0.872636898 |
| ZBTB34   | 0.048084858 | 0.052635241 | 0.872881323 |
| RNF44    | 0.002667168 | 0.005042918 | 0.873279603 |
| LGALS3   | 0.01659196  | 0.009822345 | 0.873466459 |
| DBR1     | 0.081842479 | 0.017447407 | 0.873688626 |
| EMC10    | 0.015213274 | 0.009459925 | 0.87372245  |
| STRN3    | 0.019293266 | 0.015790301 | 0.874343464 |
| EAPP     | 0.000649387 | 0.000127667 | 0.875146435 |

|            |             |             |             |
|------------|-------------|-------------|-------------|
| RBPJ       | 0.016091536 | 0.026965709 | 0.875192865 |
| NMD3       | 0.022051548 | 0.025021    | 0.875260563 |
| MAP3K9     | 0.035196403 | 0.092663426 | 0.875463179 |
| IER3       | 0.004096365 | 0.012078159 | 0.875554525 |
| CPTP       | 0.126938974 | 0.041501202 | 0.875590241 |
| RTN4       | 0.001764593 | 0.001044741 | 0.875932106 |
| XPO4       | 0.074373385 | 0.005662621 | 0.876824675 |
| ELOB       | 0.024912479 | 0.012167781 | 0.876902923 |
| ARV1       | 0.036581329 | 0.051391985 | 0.877042822 |
| CLOCK      | 0.021939451 | 0.011844585 | 0.877556147 |
| MAU2       | 0.011923355 | 0.001151423 | 0.877589547 |
| BLOC1S3    | 0.177564    | 0.034600168 | 0.877738645 |
| FAM53C     | 0.005917146 | 0.002228875 | 0.877925856 |
| CPM        | 0.009294358 | 0.02976267  | 0.878060365 |
| KIZ        | 0.029739834 | 0.039393046 | 0.878551173 |
| BRCA2      | 0.042994299 | 0.029654533 | 0.878782118 |
| CASK       | 0.024736268 | 0.029562313 | 0.879776297 |
| MBOAT7     | 0.024892922 | 0.027465615 | 0.879962696 |
| PLAGL1     | 0.002472478 | 0.000344591 | 0.880042399 |
| AIDA       | 0.003201706 | 0.000257494 | 0.880209729 |
| IGSF8      | 0.022241756 | 0.022339642 | 0.880309442 |
| UGP2       | 0.019991648 | 0.01979542  | 0.882021855 |
| ZFYVE21    | 0.000503166 | 3.25043E-05 | 0.88212067  |
| ATP6AP2    | 0.034068028 | 0.038688719 | 0.882306962 |
| CDC23      | 0.007062478 | 0.068167742 | 0.882535509 |
| SUN1       | 0.079660536 | 0.038199481 | 0.882677485 |
| MAPK6      | 0.012758723 | 0.009006891 | 0.882856147 |
| TAOK1      | 0.00596626  | 0.003006679 | 0.882950577 |
| NAA25      | 0.039352052 | 0.05157767  | 0.884146339 |
| MXD1       | 0.000920513 | 0.000119275 | 0.884333638 |
| CTPS2      | 0.008154518 | 0.01994273  | 0.884380427 |
| CCR4       | 0.146358577 | 0.033346046 | 0.884640139 |
| ZBTB44     | 0.00291966  | 0.00594658  | 0.885073651 |
| HMCN2      | 0.081338102 | 0.016613383 | 0.885217541 |
| RPS11      | 0.035646451 | 0.035700417 | 0.886016036 |
| C1RL       | 0.208669787 | 0.025737778 | 0.886242199 |
| PTGES3     | 0.020628521 | 0.016463467 | 0.886394147 |
| GSK3A      | 0.000115936 | 5.53724E-05 | 0.886553597 |
| ISOC1      | 0.048532948 | 0.007324834 | 0.88759689  |
| EMC6       | 0.032674779 | 0.006864031 | 0.888446777 |
| AC074117.1 | 0.046135816 | 0.043982682 | 0.888464294 |
| EMC4       | 0.003948253 | 0.004881412 | 0.888608031 |
| WDR72      | 0.031449266 | 0.041328052 | 0.888741422 |

|            |             |             |             |
|------------|-------------|-------------|-------------|
| TMEM170A   | 0.044257407 | 0.075021892 | 0.888973985 |
| SBDS       | 0.006975954 | 0.002129703 | 0.889560582 |
| SASH1      | 0.086717627 | 0.038744604 | 0.889701483 |
| ATP6V1G1   | 0.00531204  | 0.00267874  | 0.889745115 |
| ZNF317     | 0.040765338 | 0.02113729  | 0.890018026 |
| DDIT4      | 0.04273565  | 0.042692271 | 0.890558096 |
| LRRC27     | 0.029900313 | 0.041875054 | 0.891444652 |
| AL133453.1 | 0.002131305 | 0.002205448 | 0.891752849 |
| RBPMS      | 0.087014845 | 0.043081953 | 0.892740078 |
| POFUT1     | 0.027647092 | 0.059386089 | 0.893331737 |
| HDGF       | 0.01891064  | 0.017719323 | 0.893958757 |
| ROCK2      | 0.123945895 | 0.041336989 | 0.89415634  |
| LONP2      | 0.02129393  | 0.007388613 | 0.894226553 |
| ORMDL2     | 0.062608606 | 0.017859343 | 0.894382514 |
| ITGB1      | 0.014027855 | 0.001544267 | 0.895394525 |
| PPP1R9A    | 0.078142914 | 0.036775047 | 0.895707808 |
| STARD3     | 0.038323761 | 0.01794664  | 0.896310903 |
| LINC00526  | 0.016478379 | 0.082914837 | 0.896348562 |
| ARL4C      | 0.005712116 | 2.1583E-06  | 0.896568409 |
| BAZ1A      | 0.00060313  | 0.001998961 | 0.897302271 |
| GBP2       | 0.015429783 | 0.004903051 | 0.897722163 |
| ZKSCAN4    | 0.047537361 | 0.099594649 | 0.897918256 |
| PERP       | 0.021961112 | 0.000459293 | 0.898230479 |
| RMND5B     | 0.009111277 | 0.016074628 | 0.899143033 |
| RUNX2      | 0.076855128 | 0.020758182 | 0.899246331 |
| CXCL2      | 0.027882093 | 0.15275812  | 0.899607934 |
| GRB2       | 0.01716952  | 0.040481488 | 0.900081177 |
| SF3B6      | 0.028647526 | 0.016966073 | 0.900092868 |
| LETM1      | 0.022619405 | 0.030691608 | 0.90072185  |
| MOGS       | 0.00987244  | 0.003237727 | 0.901020335 |
| MRPS6      | 0.019340328 | 0.015650535 | 0.901113505 |
| DDX27      | 0.005136443 | 0.001974125 | 0.901808391 |
| C9orf78    | 0.043483489 | 0.041745119 | 0.901989539 |
| DDX39B     | 0.039726753 | 0.04572466  | 0.902971278 |
| MAP2K7     | 0.044679919 | 0.044686235 | 0.903355776 |
| MLXIP      | 0.020402076 | 0.005174539 | 0.903621272 |
| LLGL2      | 0.012144572 | 0.001978089 | 0.904629413 |
| SLC50A1    | 0.001626207 | 0.002878866 | 0.904787781 |
| NUP214     | 0.058142638 | 0.032224283 | 0.905254852 |
| WAPL       | 0.037516435 | 0.021040562 | 0.905325196 |
| NR3C1      | 0.099034086 | 0.048540241 | 0.906108404 |
| COG3       | 0.0414493   | 0.067083566 | 0.90621338  |
| RPL7       | 0.121573064 | 0.049594745 | 0.906707793 |

|            |             |             |             |
|------------|-------------|-------------|-------------|
| YAE1D1     | 0.02549464  | 0.015570061 | 0.907292953 |
| BORCS6     | 0.04805396  | 0.056862976 | 0.907332451 |
| TRAF3IP2   | 0.010988215 | 0.007793526 | 0.907390306 |
| C6orf226   | 0.02118702  | 0.020464701 | 0.907611789 |
| DDX60      | 0.003107509 | 0.002918127 | 0.908799354 |
| PHACTR4    | 0.002303992 | 0.016848813 | 0.909054107 |
| GABRE      | 0.043543043 | 0.033119824 | 0.909067721 |
| CLSTN1     | 0.016799394 | 0.011272173 | 0.909229095 |
| IGLC2      | 0.03952443  | 0.065725628 | 0.910391252 |
| PEX2       | 0.017320022 | 0.043598203 | 0.910412882 |
| ACTA2      | 0.022311669 | 0.014785404 | 0.910449028 |
| AP2A1      | 0.054088511 | 0.044835256 | 0.910641225 |
| SNRPA1     | 0.019900144 | 0.020396835 | 0.911174872 |
| ZC3HAV1    | 0.000698887 | 0.000624763 | 0.911566769 |
| RTN4IP1    | 0.01910085  | 0.126972876 | 0.912007834 |
| HBB        | 0.041043502 | 0.050799283 | 0.91280833  |
| MELTF      | 0.031529404 | 0.034000861 | 0.913200044 |
| CAST       | 0.012433838 | 0.008741771 | 0.913717171 |
| DVL1       | 0.000265183 | 1.00743E-06 | 0.913943309 |
| CSTF1      | 0.021018323 | 0.013387166 | 0.913953725 |
| MIA3       | 0.061698465 | 0.035616244 | 0.914306892 |
| STK19      | 0.018642907 | 0.007397585 | 0.91482556  |
| TAPBP      | 0.002743243 | 0.002990515 | 0.91502242  |
| DNAJB14    | 0.011475289 | 0.012691341 | 0.915603338 |
| ETV3       | 0.000868058 | 0.000769928 | 0.915790222 |
| DUSP18     | 0.026516944 | 0.025617486 | 0.915937014 |
| LEPROTL1   | 0.035753392 | 0.009835659 | 0.917484246 |
| MBTD1      | 0.034232484 | 0.00886298  | 0.917607299 |
| HNRNPM     | 0.009409408 | 0.002994046 | 0.917780822 |
| WASHC3     | 0.000993962 | 0.001880795 | 0.918594966 |
| PEAK1      | 0.005308572 | 0.001258632 | 0.919323877 |
| SMG1       | 0.020518846 | 0.028663862 | 0.91941574  |
| RIPK2      | 0.04359954  | 0.03326369  | 0.919569327 |
| EWSR1      | 0.004018387 | 0.002554474 | 0.919573528 |
| EIF3H      | 0.009321882 | 0.002730767 | 0.919628773 |
| PPRC1      | 0.031347113 | 0.045985575 | 0.920724415 |
| AC073111.5 | 0.034113679 | 0.075282134 | 0.92218265  |
| ZNF780A    | 0.135562538 | 0.033793069 | 0.923282063 |
| PSMC1      | 0.021355587 | 0.028479474 | 0.923422769 |
| SYNJ2      | 0.001046778 | 0.003594884 | 0.923567445 |
| MOCS3      | 0.043726412 | 0.112109775 | 0.923747588 |
| MAML2      | 0.024104302 | 0.008192411 | 0.924038572 |
| MZF1       | 0.068417061 | 0.044104804 | 0.924350456 |

|          |             |             |             |
|----------|-------------|-------------|-------------|
| ETV6     | 0.001149822 | 0.006168086 | 0.924388345 |
| ZDHH9    | 0.023082499 | 0.026324095 | 0.924397127 |
| COPB2    | 0.030607181 | 0.017051983 | 0.924403075 |
| DICER1   | 0.024088116 | 0.01543019  | 0.924717244 |
| KDM5A    | 0.108184731 | 0.049564121 | 0.924831273 |
| DDA1     | 0.005849029 | 0.009165507 | 0.92494684  |
| RPS27L   | 0.03943196  | 0.024976584 | 0.925430906 |
| SLC12A6  | 0.012201538 | 0.009579596 | 0.925554464 |
| ERBB3    | 0.003007141 | 0.003608561 | 0.927503546 |
| EPPK1    | 0.001676456 | 4.45119E-05 | 0.927714226 |
| SWI5     | 0.026903683 | 0.116050408 | 0.927721691 |
| PLPP3    | 0.06173571  | 0.009057278 | 0.927845185 |
| DCAF7    | 0.005624133 | 0.010326298 | 0.927871225 |
| ZNF451   | 0.029647496 | 0.017609475 | 0.927906325 |
| CD47     | 0.030220253 | 0.017219155 | 0.928222499 |
| FNBP4    | 0.00749504  | 0.015397056 | 0.928345913 |
| TAOK3    | 0.022096301 | 0.008400539 | 0.928576238 |
| RTCB     | 0.054166924 | 0.018779355 | 0.928976071 |
| ARID1B   | 0.021538645 | 0.016611017 | 0.929243869 |
| DCP1A    | 0.004345005 | 0.023498829 | 0.931281044 |
| CAV2     | 0.071601903 | 0.045266655 | 0.93155116  |
| GTPBP6   | 0.070325902 | 0.04975468  | 0.931774983 |
| CEP104   | 0.00184044  | 0.008196281 | 0.931818633 |
| FXD5     | 0.006562124 | 0.003419969 | 0.933359902 |
| EHBP1L1  | 0.027598852 | 0.006164065 | 0.93433827  |
| CABIN1   | 0.027214439 | 0.025917236 | 0.934467005 |
| ZBTB20   | 0.013780114 | 0.035890939 | 0.934743313 |
| VTI1B    | 0.027385021 | 0.010760365 | 0.934880168 |
| OTUD1    | 0.008821132 | 0.005317909 | 0.935453876 |
| DST      | 0.012802557 | 0.000888734 | 0.935861356 |
| PCM1     | 0.003594682 | 0.00355208  | 0.935886916 |
| ERAP1    | 0.015094061 | 0.000887041 | 0.936098639 |
| ZCCHC3   | 0.032817882 | 0.061098726 | 0.936278949 |
| OAF      | 0.072631389 | 0.0396982   | 0.936320501 |
| EIF1B    | 0.007778713 | 0.004324106 | 0.938111029 |
| HNRNPK   | 0.008549245 | 0.000951555 | 0.938166974 |
| METRNL   | 0.00155388  | 0.002299155 | 0.938564564 |
| NDUFC1   | 0.026336867 | 0.046831893 | 0.939140546 |
| ESCO1    | 0.028919378 | 0.053190338 | 0.939309054 |
| TUBB4B   | 0.003989802 | 0.001481042 | 0.939637522 |
| C12orf49 | 0.011819585 | 0.013200478 | 0.940062497 |
| MAP7D1   | 0.061347396 | 0.049022033 | 0.940405913 |
| CETN3    | 0.041473977 | 0.126859323 | 0.940454764 |

|            |             |             |             |
|------------|-------------|-------------|-------------|
| TRIR       | 0.001015425 | 0.000177008 | 0.940625871 |
| PRDM4      | 0.025809489 | 0.02717248  | 0.942212811 |
| PHF23      | 0.015931314 | 0.054735603 | 0.94280266  |
| CDK12      | 0.025979507 | 0.047626279 | 0.943113109 |
| BAK1       | 0.002741969 | 0.000682589 | 0.943182993 |
| TMEM94     | 0.001354675 | 0.108955952 | 0.94328192  |
| DOCK9      | 9.2746E-05  | 0.011553578 | 0.944554484 |
| PIGT       | 0.006151033 | 0.002073735 | 0.94518593  |
| AKAP12     | 0.233187454 | 0.003613511 | 0.945722017 |
| DPF2       | 0.033498049 | 0.03277899  | 0.946773386 |
| AGPAT1     | 0.048577333 | 0.096333844 | 0.948365818 |
| STIMATE    | 0.038281802 | 0.024691955 | 0.949059642 |
| AP2M1      | 0.010710006 | 0.003906799 | 0.949775491 |
| ACSL3      | 0.019438515 | 0.013171876 | 0.950694581 |
| HAGH       | 0.013702638 | 0.022393551 | 0.951294099 |
| TRAK2      | 0.015369202 | 0.067195576 | 0.951870833 |
| LINC01876  | 0.022362175 | 0.100360168 | 0.953619619 |
| PPP2R5A    | 0.012813519 | 0.018666046 | 0.953769734 |
| TXNRD1     | 0.004929901 | 0.002315963 | 0.953844912 |
| TMEM164    | 0.04808885  | 0.05710439  | 0.954280357 |
| CFLAR      | 0.000212451 | 0.000141335 | 0.955704202 |
| OVOL1      | 0.088576333 | 0.017129704 | 0.956320488 |
| LY6E       | 0.070394534 | 0.035916972 | 0.956566408 |
| MSX2       | 0.04899585  | 0.006823795 | 0.95670995  |
| TNIP2      | 0.004874085 | 0.000699309 | 0.957501987 |
| TBCK       | 0.028249283 | 0.026972157 | 0.957751865 |
| UFC1       | 0.09812717  | 0.037146205 | 0.957905989 |
| FXR2       | 0.037108006 | 0.032476501 | 0.959306689 |
| BLOC1S4    | 0.03346107  | 0.038335882 | 0.959715979 |
| BCL9L      | 0.008731826 | 0.005864657 | 0.959790724 |
| EMC3       | 0.017009704 | 0.024509893 | 0.960131221 |
| GALNT2     | 0.008002213 | 0.005950131 | 0.96079513  |
| POLDIP2    | 0.07099723  | 0.030565107 | 0.961654573 |
| ARFGAP3    | 0.008646424 | 0.002324595 | 0.962082639 |
| ZSWIM1     | 0.047993983 | 0.040703666 | 0.962472313 |
| CRY1       | 0.004623864 | 0.003349159 | 0.962475539 |
| TMEM161B   | 0.001447365 | 0.001887941 | 0.963069177 |
| SMOX       | 0.03854792  | 0.034124369 | 0.963315921 |
| RXRA       | 0.00434628  | 0.000306743 | 0.963330746 |
| AC139530.1 | 0.028270626 | 0.036295047 | 0.964109951 |
| TPRKB      | 0.008496681 | 0.01286264  | 0.964178571 |
| BIK        | 0.001159772 | 2.17686E-05 | 0.964240073 |
| INPP5D     | 0.03518917  | 0.023871183 | 0.964651561 |



|            |             |             |             |
|------------|-------------|-------------|-------------|
| ISG15      | 0.043298828 | 0.000835487 | 0.96466485  |
| PLK2       | 0.03472967  | 0.047860524 | 0.964860932 |
| GPBP1      | 0.011260129 | 0.019423606 | 0.96544033  |
| EIF4E      | 0.078326287 | 0.042101589 | 0.966591128 |
| EIF2S1     | 0.03130196  | 0.010304801 | 0.966782583 |
| MAP3K2     | 0.023580206 | 0.015829686 | 0.967235803 |
| PPFIBP1    | 0.058192271 | 0.04188122  | 0.967639879 |
| ARHGAP42   | 0.016834656 | 0.00750861  | 0.968827918 |
| MGAT2      | 0.032370993 | 0.032896982 | 0.968926793 |
| TRIM44     | 0.001836813 | 0.010288564 | 0.968948818 |
| DDRGK1     | 8.04128E-05 | 0.008361762 | 0.96896139  |
| ALDH3A2    | 0.013919524 | 0.015670535 | 0.969130577 |
| NOCT       | 0.028585265 | 0.02444807  | 0.970047583 |
| LINC00543  | 0.026784214 | 0.01794646  | 0.971115522 |
| B3GALT5    | 0.049299794 | 0.000577069 | 0.972789743 |
| YIPF3      | 0.035130001 | 0.023334056 | 0.973202302 |
| GBP1       | 0.036829074 | 0.0341361   | 0.974477114 |
| U62317.2   | 0.044331655 | 0.066562187 | 0.975040806 |
| H3F3A      | 0.088043182 | 0.043678499 | 0.97522657  |
| PEX6       | 0.072849305 | 0.039927417 | 0.976379452 |
| IL13RA1    | 0.001396076 | 4.71392E-05 | 0.976727506 |
| TMED9      | 0.044054339 | 0.03788905  | 0.977126694 |
| C11orf24   | 0.022651806 | 0.026680874 | 0.977765868 |
| PXMP4      | 0.022065367 | 0.000978856 | 0.980105912 |
| NDUFB4     | 0.057259303 | 0.03795507  | 0.980439724 |
| GUK1       | 0.020218975 | 0.008129839 | 0.980460411 |
| CLDN10     | 0.029584137 | 0.053364576 | 0.981289013 |
| SMIM24     | 0.169994086 | 0.015360719 | 0.98164527  |
| MBD3       | 0.026619645 | 0.036726552 | 0.982063429 |
| IBA57      | 0.048121845 | 0.029863783 | 0.983261216 |
| KCTD2      | 0.017598488 | 0.000977126 | 0.98326853  |
| RHOG       | 0.008372151 | 0.001624951 | 0.983573658 |
| CLASP1     | 0.003890926 | 0.002290714 | 0.984248512 |
| TRIM56     | 0.045265098 | 0.012515906 | 0.984456439 |
| IK         | 0.012656441 | 0.017189953 | 0.984557521 |
| SAT1       | 0.000380547 | 0.000350736 | 0.985262326 |
| NME7       | 0.028822092 | 0.008052292 | 0.985666859 |
| SUV39H2    | 0.043336949 | 0.082885087 | 0.986202886 |
| AL451165.2 | 0.085964196 | 0.015757528 | 0.986401589 |
| TOR1AIP1   | 0.007842885 | 0.003142075 | 0.986448821 |
| ACER3      | 0.010239126 | 0.010986256 | 0.986620867 |
| LRIF1      | 0.093003539 | 0.045524561 | 0.987149754 |
| SGF29      | 0.114516859 | 0.028428173 | 0.987801088 |

|             |             |             |             |
|-------------|-------------|-------------|-------------|
| SP3         | 0.007677376 | 0.005699785 | 0.98847427  |
| RNF121      | 0.01426651  | 0.000635365 | 0.988743717 |
| TGFBR1      | 0.005431107 | 0.003162772 | 0.988824811 |
| CHMP5       | 0.006002885 | 0.002217116 | 0.988835407 |
| MIOS        | 0.061041884 | 0.032644535 | 0.988887646 |
| MON1B       | 0.048963678 | 0.042888499 | 0.98946781  |
| CDK11A      | 0.021994866 | 0.038930473 | 0.989531973 |
| EMC7        | 9.55832E-05 | 7.69889E-05 | 0.990038305 |
| UBC         | 0.001266391 | 8.91591E-05 | 0.99111981  |
| ARHGEF7     | 0.002429998 | 0.000599658 | 0.991790957 |
| CTR9        | 0.002972632 | 0.007813348 | 0.991808136 |
| ARIH1       | 0.023100665 | 0.021841077 | 0.99218795  |
| ZSCAN16-AS1 | 0.043415172 | 0.120479899 | 0.992237657 |
| BCL7C       | 0.045068701 | 0.040442738 | 0.99226354  |
| SLCO4A1     | 0.063770904 | 0.01801473  | 0.992399836 |
| SUN2        | 0.008561165 | 0.00180994  | 0.992923189 |
| GEMIN6      | 0.044225596 | 0.014083083 | 0.993702968 |
| TMBIM6      | 0.000262599 | 0.000339635 | 0.993779941 |
| RNF214      | 0.069515349 | 0.036283732 | 0.994253352 |
| XRCC1       | 0.074190643 | 0.040033917 | 0.994631163 |
| CLPTM1L     | 0.026139855 | 0.011803457 | 0.995051966 |
| FAT1        | 0.015619395 | 3.39336E-06 | 0.995116478 |
| ICE1        | 0.060163625 | 0.043451604 | 0.995333895 |
| PSMD4       | 0.013550427 | 0.009317946 | 0.995500259 |
| CCNG1       | 0.03617777  | 0.034901743 | 0.995831886 |
| TRABD       | 0.015001256 | 0.002423848 | 0.995888    |
| CASP5       | 0.037178091 | 0.035599171 | 0.996097971 |
| IDI1        | 0.055140095 | 0.016383539 | 0.996116814 |
| INPP5K      | 0.013171103 | 0.015328553 | 0.996554357 |
| MLLT3       | 0.038491541 | 0.012430116 | 0.996884088 |
| SNTB2       | 0.021117736 | 0.086098353 | 0.997262263 |
| RALY        | 0.049822844 | 0.043973745 | 0.99764851  |
| MEGF9       | 0.058385337 | 0.020155642 | 0.997938749 |
| GTF2E1      | 0.000676036 | 0.003684845 | 0.998387129 |
| COX6B1      | 0.002613661 | 0.000555475 | 0.998771116 |
| DPY19L4     | 0.001167761 | 0.001195272 | 0.998926593 |

**Table S3. Primer sequence information**

| Target gene                   | Orientation | Sequence                  |
|-------------------------------|-------------|---------------------------|
| <i>TGF<math>\beta</math>1</i> | Forward     | GTACCAGAAATACAGCAACAATTCC |
|                               | Reverse     | GGTGACATCAAAAGATAACCACTCT |
| <i>WNT5B</i>                  | Forward     | GTGGCTACAACCAGT TCAAGAG   |
|                               | Reverse     | ATTTACAGATGTACTGGTCCACGAT |
| <i>CA2</i>                    | Forward     | GATGGACAAGGTTTCAGAGCATAC  |
|                               | Reverse     | ATCCAGCACATCAACAACCTTTC   |
| <i>CEL</i>                    | Forward     | AAGACCTACGCCTACCTGTTTTTC  |
|                               | Reverse     | TACTGAATGTCATCTGCATGGTC   |
| <i>GAPDH</i>                  | Forward     | TTGTCAAGCTCATTTCCTGGTATG  |
|                               | Reverse     | TCTCTCTTCCTCTTGTGCTCTTG   |
